# Supplementary material for: Multisubstituted C2-symmetric ansa-metallocenes bearing nitrogen heterocycles: influence of substituents on catalytic properties in propylene polymerization at higher temperatures
Source: Royal Society of Chemistry journal article supplement (doi:10.1039/d1dt00645b), 2021-01-01
Supplement: d1dt00645b1.pdf [file d1dt00645b1.pdf]

# Multisubstituted $C_2$ -symmetric *ansa*-Metallocenes Bearing Nitrogen Heterocycles: Influence of Substituents on Catalytic Properties in Propylene Polymerization at Higher Temperatures

Pavel S. Kulyabin,<sup>†</sup> Vyatcheslav V. Izmer,<sup>†</sup> Georgy P. Goryunov,<sup>†</sup> Mikhail I. Sharikov,<sup>†</sup> Dmitry S. Kononovich,<sup>†</sup> Dmitry V. Uborsky,<sup>†</sup> Jo Ann M. Canich,<sup>‡</sup> and Alexander Z. Voskoboinikov.\*<sup>†</sup>

<sup>†</sup>Department of Chemistry, Lomonosov Moscow State University, Leninskie Gory 1/3, Moscow 119991, Russia

<sup>‡</sup>Baytown Technology and Engineering Complex, ExxonMobil Chemical Company, 5200 Bayway Drive, Baytown, Texas 77520, USA

## Table of Contents

|                                                                                                   |     |
|---------------------------------------------------------------------------------------------------|-----|
| General Details.....                                                                              | S2  |
| Syntheses of substituted 4/7-bromoindenes.....                                                    | S2  |
| Syntheses of substituted 4-(N-carbazolyl)indenes via Buchwald-Hartwig reaction.....               | S5  |
| Synthesis of substituted 2-Methyl-1 <i>H</i> -inden-4/7-amines.....                               | S8  |
| Synthesis of 4-(N-heterocycle)indenes from substituted 2-methyl-1 <i>H</i> -inden-4/7-amines..... | S11 |
| Syntheses of bis(indenyl)dimethylsilane proligands and zirconocenes.....                          | S16 |
| Small scale propylene polymerization experiments.....                                             | S33 |
| Crystal structure determinations.....                                                             | S38 |
| References.....                                                                                   | S46 |
| NMR Spectra of zirconocene precatalysts.....                                                      | S47 |
| <sup>13</sup> C NMR Spectra of selected polypropylenes.....                                       | S71 |

## GENERAL DETAILS

All syntheses involving air- and moisture sensitive compounds were carried out using standard Schlenk-type glassware or in a argon-filled Vacuum Atmospheres glove box (<1 ppm O<sub>2</sub>). Toluene, CH<sub>2</sub>Cl<sub>2</sub>, hexane, pentane, chloroform-*d*<sub>1</sub> and dichloromethane-*d*<sub>2</sub> were dried using 4 Å molecular sieves activated for 24 h at 200–230 °C under dynamic vacuum. Diethyl ether and tetrahydrofuran were refluxed over Na/benzophenone and distilled prior to use. All dry solvents were stored under an argon atmosphere. Commercial chemicals (Aldrich, Fluka, TCI, Alfa, Abcr, and Merck) including 2-di-*tert*-butylphosphino-2'-methylbiphenyl (*t*BuMePhos), 2,2'-dibromobiphenyl were used without further purification. 7-Bromo-2-methyl-1*H*-indene (**1**),<sup>1</sup> 3,6-dimethyl-9*H*-carbazole,<sup>2</sup> 3,6-di-*tert*-butyl-9*H*-carbazole,<sup>3</sup> 8,9-dihydro-4*H*-benzo[*def*]carbazole,<sup>4</sup> 4-bromo-2-isopropyl-1*H*-indene (**2**),<sup>5</sup> 2,6,6-trimethyl-3,5,6,7-tetrahydro-*s*-indacen-1(2*H*)-one,<sup>6</sup> 7-bromo-2-methyl-5-*tert*-butyl-1*H*-indene (**5**),<sup>7</sup> 7-bromo-4-methoxy-2-methyl-1*H*-indene (**6**),<sup>8</sup> 4-bromo-2,5-dimethyl-1*H*-indene (**16**),<sup>1</sup> 7-bromo-5-*tert*-butyl-6-methoxy-2-methyl-1*H*-indene (**21**),<sup>9</sup> 1-bromo-2-(methylethynyl)benzene,<sup>10</sup> 1-bromo-2-(phenylethynyl)benzene,<sup>11</sup> 2-bromo-1-iodo-4-methylbenzene,<sup>12</sup> 2,2'-dibromo-4,4'-di-*tert*-butyl-1,1'-biphenyl,<sup>13</sup> were synthesized as previously described. NMR spectra were recorded on Bruker Avance 400 MHz spectrometer at ambient temperature (reported relatively to TMS and referenced either to TMS, or to the residual <sup>1</sup>H or <sup>13</sup>C resonances of the deuterated solvents). The following abbreviations were used for <sup>1</sup>H NMR spectra to indicate the signal multiplicity: s (singlet); br.s (broad signal), d (doublet), t (triplet), q (quartet), p (pentet or quintet), sext (sextet), sept (septet) and m (multiplet) as well as combinations of them. All <sup>13</sup>C NMR spectra were measured with <sup>1</sup>H-decoupling. High-resolution mass spectra (HRMS) were recorded on Agilent Technologies 6530 Q-TOF LC/MS system paired Agilent 1260 HPLC and using Agilent JetStream ion source (ESI). C, H, N microanalyses were done using «Elementar Vario MICRO cube».

## SYNTHESES OF SUBSTITUTED 4/7-BROMOINDENES

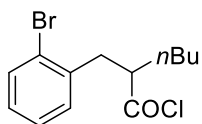

**2-(2-Bromobenzyl)hexanoyl chloride.** In a three-necked round-bottom 2000-mL flask equipped with a reflux condenser, a dropping funnel with pressure-equalizing bypass, and a magnetic stirring bar, 10.9 g (472 mmol) of sodium metal was dissolved in 400 mL of dry ethanol. To the resulting solution, 100 g (463 mmol) of diethylbutylmalonate was added dropwise over 15 min. This mixture was stirred for 15 min; then, 115.8 g (463 mmol) of 2-bromobenzyl bromide was added with vigorous stirring at such a rate as to maintain gentle reflux. This mixture was refluxed for an additional 4 h and cooled to room temperature. A solution of 104 g of KOH in 200 mL of water was then added. This mixture was refluxed for 3 h to saponificate the ester formed. Ethanol and water were then distilled off. To the residue, 500 mL of water and then 12 M HCl (to pH 1) were added. The substituted butylmalonic acid was extracted from the solution with 3×100 mL of dichloromethane, organic layers were collected dried over Na<sub>2</sub>SO<sub>4</sub> and the solvent was rotary evaporated. Crude 3-(2-bromobenzyl)hexanoic acid was obtained after decarboxylation of this substituted methylmalonic acid for 2 h at 160 °C. The product was used without further purification. A mixture of the obtained 2-(2-bromobenzyl)hexanoyl acid and 100 mL (166 g, 1.39 mol) of SOCl<sub>2</sub> was stirred for 12 h at room temperature. An excess of SOCl<sub>2</sub> was distilled off in vacuum, and the following distillation of residue, b.p. 120–150 °C/2 mbar, gave 107.9 g (89%) of 2-(2-bromobenzyl)hexanoyl chloride as yellowish liquid. <sup>1</sup>H NMR (400 MHz, CDCl<sub>3</sub>): δ 7.56 (m, 1H), 7.25 (m, 2H), 7.12 (dt, *J* = 8.1 Hz, 4.5 Hz, 1H), 3.28 (m, 1H), 3.16 (m, 1H), 3.00 (m, 1H), 1.84 (m, 1H), 1.68 (m, 1H), 1.36 (m, 4H), 0.92 (t, *J* = 7.0 Hz, 3H). <sup>13</sup>C{<sup>1</sup>H} NMR (100 MHz, CDCl<sub>3</sub>): δ 176.3, 137.0, 133.0, 131.3, 128.6, 127.5, 124.4, 56.7, 38.0, 31.5, 28.6, 22.4, 13.7.

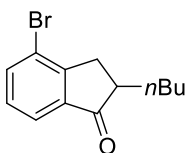

**4-Bromo-2-butylindan-1-one.** Solution of 107.9 (355 mmol) of 2-(2-bromobenzyl)hexanoyl chloride in 50 of dichloromethane was added dropwise to a cold (0 °C) suspension of 59.3 g (444 mmol) of AlCl<sub>3</sub> in 1 L of dichloromethane. This mixture was then stirred for 20 h at room temperature and then poured on 2000 cm<sup>3</sup> of ice. The organic layer was separated, and aqueous layer was extracted with 3×200 mL of dichloromethane. The combined extract was washed by 10% aqueous K<sub>2</sub>CO<sub>3</sub>, dried over K<sub>2</sub>CO<sub>3</sub>, passed through short column with Silica Gel 60, and then evaporated to dryness. Distillation of the residue, b.p. 138–140 °C/2 mbar, gave 70.1 g (88%) of 4-bromo-2-butylindan-1-one as a colorless oil. <sup>1</sup>H NMR (400 MHz, CDCl<sub>3</sub>): δ 7.73 (m, 1H), 7.67 (m, 1H), 7.25 (t, *J* = 7.6 Hz, 1H), 3.257 (dd, *J* = 17.5 Hz, 7.5 Hz, 1H), 2.64–2.75 (m, 2H), 1.95 (m, 1H), 1.30–1.51 (m, 5H), 0.91 (t, *J* = 7.1 Hz, 3H). <sup>13</sup>C{<sup>1</sup>H} NMR (100 MHz, CDCl<sub>3</sub>): δ 207.8, 153.2, 138.7, 137.1, 128.9, 122.5, 122.0, 47.2, 33.8, 30.9, 29.3, 22.5, 13.8. HRMS (ESI) calc. for C<sub>13</sub>H<sub>16</sub>BrO<sup>+</sup>: 267.0379 [M + H]<sup>+</sup>; found: 267.0376.

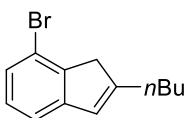

**7-Bromo-2-butyl-1H-indene (3).** To a solution of 62.2 g (233 mmol) of 4-bromo-2-butylindan-1-one in 500 mL of THF, 13.2 g (350 mmol) of NaBH<sub>4</sub> was added at 5 °C. To the resulting suspension, 250 mL of methanol was added dropwise at 5 °C, and then the reaction mixture was stirred at room temperature overnight. Next, volatiles were rotary evaporated and the residue was diluted with 1 L of water and extracted with 300 mL of dichloromethane. The organic extract was evaporated to dryness. The residue was dissolved in 500 mL of toluene, and 1.0 g of TsOH was added. The resulting mixture was refluxed with Dean-Stark head for 1 h to dehydrate 4-bromo-2-isopropylindan-1-ol, then cooled to room temperature, and washed by 10% Na<sub>2</sub>CO<sub>3</sub>. The organic layer was separated, dried over K<sub>2</sub>CO<sub>3</sub>, passed through short column with Silica Gel 60, and evaporated to dryness. Distillation of the residue, b.p. 132–135 °C/6 mbar, gave 52.6 g (90%) of 7-bromo-2-butyl-1H-indene as colorless oil. <sup>1</sup>H NMR (400 MHz, CDCl<sub>3</sub>): δ 7.24 (m, 1H), 7.20 (m, 1H), 7.11 (m, 1H), 6.53 (m, 1H), 3.31 (s, 2H), 2.51 (t, *J* = 7.6 Hz, 2H), 1.62 (m, 2H), 1.41 (m, 2H), 0.97 (t, *J* = 7.3 Hz, 3H). <sup>13</sup>C{<sup>1</sup>H} NMR (100 MHz, CDCl<sub>3</sub>): δ 151.5, 147.1, 143.0, 128.1, 126.5, 126.0, 118.7, 118.4, 42.6, 31.0, 30.8, 22.5, 13.9. HRMS (ESI) calc. for C<sub>13</sub>H<sub>15</sub>BrNa<sup>+</sup>: 273.0249 [M + Na]<sup>+</sup>; found: 273.0242.

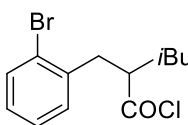

**2-(2-Bromobenzyl)-4-methylpentanoyl chloride.** In a three-necked round-bottom flask, 23.0 g (1.0 mol) of sodium metal was dissolved in 760 mL of dry ethanol. To the resulting solution, 216.3 g (1.0 mol) of diethyl isobutyrylmalonate was added in one portion. This mixture was stirred for 15 min, then, 249.9 g (1.0 mol) of 1-bromo-2-(bromomethyl)benzene was added at such a rate as to maintain gentle reflux. This mixture was refluxed for an additional 6 h and cooled to room temperature. A solution of 205 g of KOH in 550 mL of water was added. This mixture was refluxed for 5 h to saponify the ester formed. Ethanol was distilled off, and 1000 mL of water and then 12 M HCl (to pH 1) were added to the residue. The acidification was accompanied by decarboxylation with vigorous release of CO<sub>2</sub>. Crude 2-(2-bromobenzyl)-4-methylpentanoic acid was extracted with ether, the extract was dried with anhydrous Na<sub>2</sub>SO<sub>4</sub> and evaporated. The resulting oil was additionally heated to 200 °C. A mixture of this acid and 255 mL (3.52 mol) of SOCl<sub>2</sub> was stirred for 24 h at ambient temperature. Thionyl chloride was distilled off (at <50 °C). Distillation of the residue gave 266.6 g (88%) of 2-(2-bromobenzyl)-4-methylpentanoyl chloride as a yellowish oil, b.p. 127–132 °C/6 mm Hg. <sup>1</sup>H NMR (400 MHz, CDCl<sub>3</sub>): δ 7.55 (d, *J* = 8.3 Hz, 1H), 7.27–7.21 (m, 2H), 7.14–7.08 (m, 1H), 3.40–3.30 (m, 1H), 3.12 (dd, *J* = 13.9 Hz, 8.6 Hz, 1H), 2.99 (dd, *J* = 13.9 Hz, 5.8 Hz, 1H), 1.88–1.78 (m, 1H), 1.78–1.64 (m, 1H), 1.44–1.35 (m, 1H), 0.96 (d, *J* = 6.6 Hz, 6H), 0.92 (d, *J* = 6.6 Hz, 3H). <sup>13</sup>C{<sup>1</sup>H} NMR (101 MHz, CDCl<sub>3</sub>): δ 176.7, 136.9, 133.1, 131.4, 128.7, 127.6, 124.5, 55.1, 41.3, 38.9, 25.9, 23.0, 21.9.

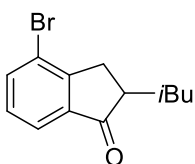

**4-Bromo-2-isobutylindan-1-one.** A solution of 266.6 g (0.878 mmol) of 2-(2-bromobenzyl)-4-methylpentanoyl chloride dissolved in 250 mL of CH<sub>2</sub>Cl<sub>2</sub> was added dropwise to a suspension of 140.5 g (1.05 mol) of AlCl<sub>3</sub> in 1000 mL of CH<sub>2</sub>Cl<sub>2</sub> over 2 h at 0 °C. Then, this mixture was stirred at room temperature overnight and poured onto 1000 cm<sup>3</sup> of ice. The organic layer was separated. The aqueous layer was extracted with 3 x 200 mL of CH<sub>2</sub>Cl<sub>2</sub>.

The combined extract was dried over K<sub>2</sub>CO<sub>3</sub> and evaporated to dryness. Fractional rectification of the residue gave 211.8 g (90%) of 4-bromo-2-isobutylindan-1-one as a yellowish oil, b.p. 138–144 °C/5 mm Hg. <sup>1</sup>H NMR (400 MHz, CDCl<sub>3</sub>): δ 7.75 (d, *J* = 7.6 Hz, 1H), 7.70 (d, *J* = 7.6 Hz, 1H), 7.27 (d, *J* = 7.6 Hz, 1H), 3.55–3.21 (m, 1H), 2.80–2.64 (m, 2H), 1.92–1.75 (m, 2H), 1.41–1.27 (m, 1H), 0.99 (d, *J* = 6.1 Hz, 6H). <sup>13</sup>C{<sup>1</sup>H} NMR (101 MHz, CDCl<sub>3</sub>): δ 208.4, 153.3, 138.7, 137.3, 129.1, 122.7, 122.1, 45.9, 40.5, 34.4, 26.5, 23.4, 21.6. HRMS (ESI) calc. for C<sub>13</sub>H<sub>16</sub>BrO<sup>+</sup>: 267.0379 [M + H]<sup>+</sup>; found: 267.0378.

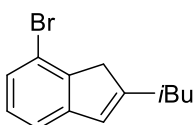

**7-Bromo-2-isobutyl-1H-indene (4).** To a solution of 103.82 g (388.6 mmol) of 4-bromo-2-isobutylindan-1-one in 400 mL of THF cooled to 5 °C, 22.1 g (584.2 mmol) of NaBH<sub>4</sub> was added. Further on, 200 mL of methanol was added dropwise to this mixture for ca. 5 h at 5 °C. This mixture was stirred overnight at room temperature and then evaporated to dryness.

To the obtained white mass, 1000 mL of dichloromethane and 1000 mL of water were added, and the resulting mixture was acidified by 2 M HCl to pH~4. The organic layer was separated, and the aqueous layer was extracted with 2 x 150 mL of dichloromethane. The combined organic extract was dried over Na<sub>2</sub>SO<sub>4</sub> and then evaporated to dryness to give a white solid mass. To a solution of this mass in 800 mL of toluene, 1.0 g of TsOH was added, this mixture was rapidly heated to reflux, refluxed with Dean-Stark head for 15 min, and then quickly cooled to room temperature using water bath. The resulting solution was washed by 10% aqueous K<sub>2</sub>CO<sub>3</sub>. The organic layer was separated, the aqueous layer was extracted with 2 x 150 mL of dichloromethane. The combined organic extract was dried over K<sub>2</sub>CO<sub>3</sub> and then passed through a short pad of silica gel 60 (40–63 μm). The silica gel layer was additionally washed by 100 mL of dichloromethane. The combined organic elute was evaporated to dryness to give a light orange liquid which was then distilled in vacuum to give 87.7 g (90%) of 7-bromo-2-isobutyl-1H-indene (b.p. 162–164 °C/16 mm Hg) as a colorless liquid. <sup>1</sup>H NMR (400 MHz, CDCl<sub>3</sub>): δ 7.21 (d, *J* = 7.6 Hz, 1H), 7.18 (d, *J* = 7.6 Hz, 1H), 7.08 (d, *J* = 7.6 Hz, 1H), 6.51 (s, 1H), 3.27 (s, 2H), 2.35 (d, *J* = 7.1 Hz, 2H), 1.91 (sept, 1H), 0.94 (d, *J* = 6.6 Hz, 6H). <sup>13</sup>C{<sup>1</sup>H} NMR (100 MHz, CDCl<sub>3</sub>): δ 150.6, 147.1, 143.2, 128.2, 127.3, 126.7, 118.8, 118.5, 42.8, 40.7, 28.3, 22.6. HRMS (ESI) calc. for C<sub>13</sub>H<sub>15</sub>BrNa<sup>+</sup>: 273.0249 [M + Na]<sup>+</sup>; found: 273.0251.

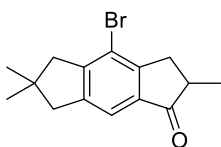

**4-Bromo-2,6,6-trimethyl-3,5,6,7-tetrahydro-s-indacen-1(2H)-one.** Solution of 14.0 g (65.5 mmol) 2,6,6-trimethyl-3,5,6,7-tetrahydro-s-indacen-1(2H)-one in 20 mL of dichloromethane was added dropwise in 15 min to a suspension of 21.8 g (164 mmol) AlCl<sub>3</sub> in 60 mL of dichloromethane at 0 °C. Then a solution of 3.3 mL (65.5 mmol) bromine in 20 mL of dichloromethane was added dropwise in 1 h at 0 °C. After that the resulting reaction mixture was poured into 500 mL of 1M solution of HCl, cooled to 0 °C and extracted with 200 mL of dichloromethane.

Organic layers were collected, dried under Na<sub>2</sub>SO<sub>4</sub> and solvents were rotary evaporated. The residue was recrystallized from hexane at -20 °C giving 13.4 g (69%) of the product as a yellowish solid. <sup>1</sup>H NMR (400 MHz, CDCl<sub>3</sub>): δ 7.41 (s, 1H), 3.23 (dd, *J* = 17.4 Hz, 7.8 Hz, 1H), 2.80 (s, 2H), 2.76 (s, 2H), 2.68 (m, 1H), 2.54 (dd, *J* = 17.4 Hz, 3.3 Hz, 1H), 1.27 (d, *J* = 7.6 Hz, 3H), 1.13 (s, 6H). <sup>13</sup>C{<sup>1</sup>H} NMR (101 MHz, CDCl<sub>3</sub>): δ 208.2, 151.9, 151.8, 145.1, 137.1, 119.1, 118.4, 48.8, 47.9, 42.3, 39.9, 35.6, 28.5, 16.3. HRMS (ESI) calc. for C<sub>15</sub>H<sub>18</sub>BrO<sup>+</sup>: 293.0536 [M + H]<sup>+</sup>; found: 293.0531.

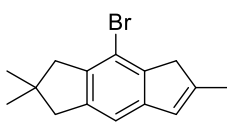

**4-Bromo-2,2,6-trimethyl-1,2,3,5-tetrahydro-s-indacene (17).** To a solution of 10.6 g (36 mmol) of 4-bromo-2,6,6-trimethyl-3,5,6,7-tetrahydro-s-indacene-1(2*H*)-one in 100 mL of THF-MeOH (2:1, vol.) 2.0 g (54 mmol) of NaBH<sub>4</sub> was added by small portions at 5 °C. The resulting mixture was stirred overnight, and then 500 mL of water was added. This solution was acidified to pH 1, and then the product was extracted with 100 mL of dichloromethane. The organic extract was evaporated to dryness. The residue was dissolved in 120 mL of toluene, and 50 mg of *p*TsOH was added. The resulting mixture was refluxed with Dean-Stark head for 15 min to dehydrate 4-bromo-2,6,6-trimethyl-3,5,6,7-tetrahydro-s-indacene-1(2*H*)-ol, then cooled to room temperature, passed through the short pad of silica gel. Toluene was evaporated and the residue was distilled at 110 °C/1 mbar using Kugelrohr. Yield: 8.1 g (81%). <sup>1</sup>H NMR (400 MHz, CDCl<sub>3</sub>): δ 6.96 (s, 1H), 6.44 (m, 1H), 3.22 (s, 2H), 2.78 (m, 4H), 2.14 (s, 3H), 1.17 (s, 6H). <sup>13</sup>C{<sup>1</sup>H} NMR (100 MHz, CDCl<sub>3</sub>): δ 145.7, 145.5, 143.3, 141.2, 138.7, 127.1, 116.3, 115.2, 48.7, 48.3, 43.8, 39.6, 28.9, 16.7. HRMS (ESI) calc. for C<sub>15</sub>H<sub>17</sub>BrNa<sup>+</sup>: 299.0406 [M + Na]<sup>+</sup>; found: 299.0408.

### SYNTHESES OF SUBSTITUTED 4-(N-CARBAZOLYL)INDENES VIA BUCHWALD-HARTWIG REACTION

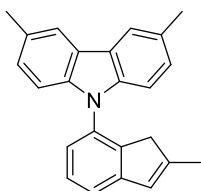

**3,6-Dimethyl-9-(2-methyl-1*H*-indene-7-yl)-9*H*-carbazole (7).** To a warm solution of 30.7 g (157 mmol) of 3,6-dimethyl-9*H*-carbazole in 1 L of toluene, 62.8 mL (157 mmol) of 2.5 M <sup>*n*</sup>BuLi in hexanes was added. The resulting viscous mixture was refluxed for 30 min, then, 30.0 g (143 mmol) of 7-bromo-2-methyl-1*H*-indene (**1**) was added followed by a mixture of 1.28 g (5.7 mmol) of Pd(OAc)<sub>2</sub> and 3.13 g (3.0 mmol) of *t*BuMePhos. The resulting mixture was refluxed for 6 h, cooled to room temperature and filtered through a short pad of Celite<sup>®</sup> and evaporated to dryness. The crude product was purified by column chromatography on Silica Gel 60 (eluent: hexanes/dichloromethane = 10/1). Yield: 34.7 g (75%) of a white solid. <sup>1</sup>H NMR (400 MHz, CDCl<sub>3</sub>): δ 8.04 (m, 2H), 7.45–7.53 (m, 2H), 7.30 (m, 3H), 7.14 (m, 2H), 6.66 (m, 1H), 3.11 (s, 2H), 2.65 (s, 6H), 2.13 (s, 3H). <sup>13</sup>C{<sup>1</sup>H} NMR (100 MHz, CDCl<sub>3</sub>): δ 148.1, 146.8, 140.7, 139.2, 132.8, 128.6, 128.0, 127.0, 126.9, 123.4, 123.1, 120.2, 119.5, 41.3, 21.4, 16.6. HRMS (ESI) calc. for C<sub>24</sub>H<sub>21</sub>NNa<sup>+</sup>: 346.1566 [M + Na]<sup>+</sup>; found: 346.1573.

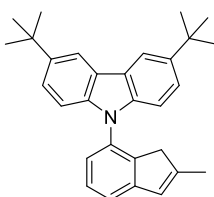

**3,6-Di-*tert*-butyl-9-(2-methyl-1*H*-indene-4/7-yl)-9*H*-carbazole (8).** To a warm solution of 43.9 g (157 mmol) of 3,6-di-*tert*-butyl-9*H*-carbazole in 1 L of toluene, 62.8 mL (157 mmol) of 2.5 M <sup>*n*</sup>BuLi in hexanes was added. The resulting viscous mixture was refluxed for 30 min, then, 30.0 g (143 mmol) of 7-bromo-2-methyl-1*H*-indene (**1**) was added followed by a mixture of 1.28 g (5.7 mmol) of Pd(OAc)<sub>2</sub> and 3.13 g (3.0 mmol) of *t*BuMePhos. The resulting mixture was refluxed for 6 h, cooled to room temperature and filtered through a short pad of Celite<sup>®</sup> and evaporated to dryness. The crude product was purified by column chromatography on Silica Gel 60 (eluent: hexanes/dichloromethane = 10/1). Yield: 40.2 g (69%) of a white solid. The product was a mixture of isomers major/minor = 1.4/1.0. Major isomer: <sup>1</sup>H NMR (400 MHz, CDCl<sub>3</sub>): δ 8.23 (m, 2H), 7.45–7.50 (m, 3H), 7.35 (m, 1H), 7.30 (d, *J* = 7.3 Hz, 1H), 7.17 (d, *J* = 8.6 Hz, 2H), 6.14 (m, 1H), 3.46 (s, 2H), 2.10 (s, 3H), 1.53 (s, 18H). Minor isomer: <sup>1</sup>H NMR (400 MHz, CDCl<sub>3</sub>): δ 8.23 (m, 2H), 7.41–7.48 (m, 4H), 7.23 (m, 1H), 7.10 (d, *J* = 8.7 Hz, 2H), 6.60 (m, 1H), 3.09 (s, 2H), 2.08 (s, 3H), 1.52 (s, 18H). <sup>13</sup>C{<sup>1</sup>H} NMR (major\*/minor°, 100 MHz, CDCl<sub>3</sub>): δ 148.1, 146.9, 146.8, 145.4, 143.4, 142.29\*, 142.26°, 140.7, 139.7, 139.1, 132.9, 129.2, 128.0, 127.0, 125.4, 125.1, 124.6, 123.4, 123.39, 123.1, 122.6, 119.5, 116.2°, 116.1\*, 109.6\*, 109.4°, 43.2\*, 41.4°, 34.7, 32.1, 16.8\*, 16.6°. HRMS (ESI) calc. for C<sub>30</sub>H<sub>33</sub>NNa<sup>+</sup>: 430.2505 [M + Na]<sup>+</sup>; found: 430.2498.

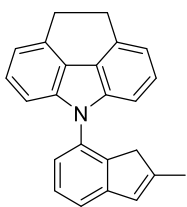

**4-(2-Methyl-1H-inden-7-yl)-8,9-dihydro-4H-benzo[def]carbazole (9).** To a warm solution of 5.5 g (28.5 mmol) of 8,9-dihydro-4H-benzo[def]carbazole in 250 mL of toluene, 10.9 mL (27.2 mmol) of 2.5 M *n*BuLi in hexanes was added. The resulting viscous mixture was refluxed for 30 min, then, 5.42 g (25.9 mmol) of 7-bromo-2-methyl-1H-indene (**1**) was added followed by a mixture of 175 mg (0.78 mmol) of Pd(OAc)<sub>2</sub> and 485 mg (1.55 mmol) of *t*BuMePhos. The resulting mixture was refluxed for 6 h, cooled to room temperature and filtered through a short pad of Celite<sup>®</sup> and evaporated to dryness. The crude product was purified by column chromatography on Silica Gel 60 (eluent: hexanes/ethylacetate = 10/1). Yield: 6.68 g (80%) of a white solid. <sup>1</sup>H NMR (400 MHz, CDCl<sub>3</sub>): δ 7.44 (m, 1H), 7.30–7.39 (m, 4H), 7.03–7.08 (m, 4H), 6.61 (m, 1H), 3.45 (m, 4H), 3.20 (s, 2H), 3.16 (s, 3H). <sup>13</sup>C{<sup>1</sup>H} NMR (100 MHz, CDCl<sub>3</sub>): δ 148.2, 146.8, 146.6, 145.6, 141.9, 139.3, 138.7, 138.3, 133.6, 130.5, 130.3, 130.1, 127.8, 127.0, 126.70, 126.66, 125.3, 124.6, 123.8, 123.0, 122.9, 122.2, 122.0, 119.1, 117.1, 108.2, 108.0, 43.1, 41.7, 26.6, 16.8, 16.6. HRMS (ESI) calc. for C<sub>24</sub>H<sub>19</sub>NNa<sup>+</sup>: 344.1410 [M + Na]<sup>+</sup>; found: 344.1413.

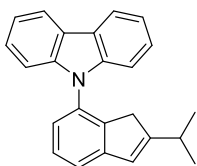

**9-(2-Isopropyl-1H-indene-4/7-yl)-9H-carbazole (10).** 42.0 mL (105 mmol) of 2.5M solution of *n*-butyllithium in hexane was added to solution of 17.5 g (105 mmol) carbazole in 1 L of toluene. The resulting solution was refluxed for 30 min. Next, 22.7 g (95.7 mmol) of 4-bromo-2-isopropyl-1H-indene (**2**) and premixed 0.86 g (3.8 mmol) Pd(OAc)<sub>2</sub> and 2.09 g (6.7 mmol) of *t*BuMePhos were added to the obtained solution. Brown reaction mixture was refluxed for 6 hours until the lithium salt of carbazole dissolved completely and a dark heavy precipitate was formed. The mixture was cooled to room temperature and filtered through a short pad of Celite<sup>®</sup>. The solvent was evaporated and the residue was purified by column chromatography on Silica Gel 60 (eluent: hexane/dichloromethane = 10/1). Yield: 24.8 g (80%) of a white solid. The product was a mixture of isomers major/minor = 2.4/1.0. Major isomer: <sup>1</sup>H NMR (400 MHz, CDCl<sub>3</sub>): δ 8.33 (d, *J* = 7.7 Hz, 2H), 7.52–7.59 (m, 4H), 7.37–7.45 (m, 4H), 7.33 (m, 1H), 6.76 (m, 1H), 3.23 (s, 2H), 2.78 (m, 1H), 1.26 (d, *J* = 6.9 Hz, 6H). <sup>13</sup>C{<sup>1</sup>H} NMR (100 MHz, CDCl<sub>3</sub>): δ 157.8, 147.9, 140.6, 140.5, 128.1, 125.8, 125.7, 123.9, 123.6, 123.1, 120.3, 120.1, 119.5, 110.0, 37.9, 29.9, 22.3. Minor isomer: <sup>1</sup>H NMR (400 MHz, CDCl<sub>3</sub>): δ 8.32 (d, *J* = 7.6 Hz, 2H), 7.52–7.64 (m, 4H), 7.37–7.45 (m, 4H), 7.33 (m, 1H), 6.26 (br.s, 1H), 3.63 (s, 2H), 2.81 (m, 1H), 1.25 (d, *J* = 6.9 Hz, 6H). <sup>13</sup>C{<sup>1</sup>H} NMR (100 MHz, CDCl<sub>3</sub>): δ 158.2, 145.2, 143.1, 141.1, 132.6, 128.9, 125.5, 124.8, 123.1, 123.0, 121.9, 120.1, 119.5, 110.2, 39.6, 30.1, 22.4. HRMS (ESI) calc. for C<sub>24</sub>H<sub>21</sub>NNa<sup>+</sup>: 346.1566 [M + Na]<sup>+</sup>; found: 346.1570.

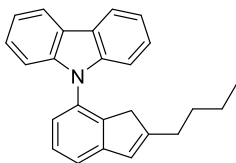

**9-(2-Butyl-1H-inden-4/7-yl)-9H-carbazole (11).** To a warm solution of 20.5 g (122.6 mmol) of 9H-carbazole in 1000 mL of toluene, 40.0 mL (100 mmol) of 2.5 M *n*BuLi in hexanes was added. The resulting viscous mixture was stirred 0.5 h at room temperature, then, 25.1 g (100.0 mmol) of 7-bromo-2-butyl-1H-indene (**3**) was added followed by a mixture of 450 mg (2.0 mmol, 2 mol.%) of Pd(OAc)<sub>2</sub> and 938 mg (3.0 mmol, 3 mol.%) of *t*BuMePhos. The resulting mixture was refluxed for 6 h, cooled to room temperature and filtered through a short pad of Celite<sup>®</sup> and evaporated to dryness. The crude product was purified by column chromatography on Silica Gel 60 (eluent: hexanes/dichloromethane = 10/1, then, 5/1, vol.). Yield: 25.3 g (75%) of a white solid. The product was a mixture of isomers major/minor = 1.5/1.0. Major isomer: <sup>1</sup>H NMR (400 MHz, CDCl<sub>3</sub>): δ 8.45 (m, 2H), 7.63–7.71 (m, 4H), 7.50–7.59 (m, 4H), 7.47 (m, 1H), 6.86 (m, 1H), 3.33 (s, 2H), 2.60 (m, 2H), 1.74 (m, 2H), 1.57 (m, 2H), 1.16 (m, 3H). Minor isomer: <sup>1</sup>H NMR (400 MHz, CDCl<sub>3</sub>): δ 8.45 (m, 2H), 7.63–7.71 (m, 4H), 7.50–7.59 (m, 4H), 7.47 (m, 1H), 6.43 (m, 1H), 3.68 (s, 2H), 2.62 (m, 2H), 1.74 (m, 2H), 1.57 (m, 2H), 1.15 (m, 3H). <sup>13</sup>C{<sup>1</sup>H} NMR (major\*/minor°, 100 MHz, CDCl<sub>3</sub>): δ 152.0\*, 151.7°, 148.0\*, 145.3°, 143.1°, 141.1\*, 140.6\*, 140.5°, 132.5, 128.7, 128.0, 125.8, 125.7, 125.4, 124.6, 123.8, 123.4, 123.11, 123.07, 122.9, 120.3\*, 120.1°, 119.9°, 119.5\*, 110.2°, 109.9\*, 41.4°, 39.6\*, 30.9°, 30.81\*, 30.77°, 30.6\*, 22.4\*, 22.3°, 13.79\*, 13.76°. HRMS (ESI) calc. for C<sub>25</sub>H<sub>23</sub>NNa<sup>+</sup>: 360.1723 [M + Na]<sup>+</sup>; found: 360.1720.

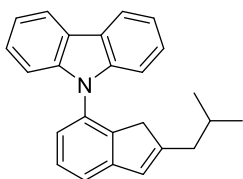

**9-(2-Isobutyl-1H-inden-7-yl)-9H-carbazole (12).** To a warm solution of 15.0 g (89.5 mmol) of 9H-carbazole in 700 mL of toluene, 29.2 mL (73.0 mmol) of 2.5 M <sup>n</sup>BuLi in hexanes was added. The resulting viscous mixture was stirred 0.5 h at room temperature, then, 18.3 g (73.0 mmol) of 7-bromo-2-isobutyl-1H-indene (**4**) was added followed by a mixture of 329 mg (1.46 mmol, 2 mol.%) of Pd(OAc)<sub>2</sub> and 685 mg (2.2 mmol, 3 mol.%) of tBuMePhos. The resulting mixture was refluxed for 6 h, cooled to room temperature and filtered through a short pad of Celite<sup>®</sup> and evaporated to dryness. The crude product was purified by column chromatography on Silica Gel 60 (eluent: hexanes/dichloromethane = 10/1, then, 5/1, vol.). Yield: 17.3 g (70%) of a white solid. <sup>1</sup>H NMR (400 MHz, CDCl<sub>3</sub>): δ 8.15 (d, *J* = 7.8 Hz, 2H), 7.46–7.32 (m, 4H), 7.30–7.18 (m, 3H), 7.14 (d, *J* = 8.2 Hz, 2H), 6.58 (s, 1H), 3.00 (s, 2H), 2.13 (d, *J* = 7.1 Hz, 2H), 1.71 (m, 1H), 0.84 (d, *J* = 6.6 Hz, 6H). <sup>13</sup>C{<sup>1</sup>H} NMR (101 MHz, CDCl<sub>3</sub>): δ 150.7, 148.1, 140.7, 140.6, 132.5, 128.1, 127.1, 125.8, 123.5, 123.1, 120.3, 119.9, 119.5, 110.0, 40.6, 39.9, 28.1, 22.6. HRMS (ESI) calc. for C<sub>25</sub>H<sub>23</sub>NNa<sup>+</sup>: 360.1723 [M + Na]<sup>+</sup>; found: 360.1724.

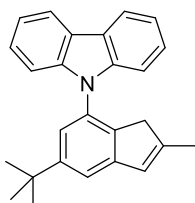

**9-(2-Methyl-6-tert-butyl-1H-inden-7-yl)-9H-carbazole (13).** To a warm solution of 15.0 g (89.5 mmol) of 9H-carbazole in 700 mL of toluene, 29.2 mL (73.0 mmol) of 2.5 M <sup>n</sup>BuLi in hexanes was added. The resulting viscous mixture was refluxed for 30 min, then 19.4 g (73.0 mmol) of 7-bromo-2-methyl-5-tert-butyl-1H-indene (**5**) was added followed by a mixture of 658 mg (2.9 mmol, 4 mol.%) of Pd(OAc)<sub>2</sub> and 1.6 g (5.1 mmol, 7 mol.%) of tBuMePhos. The resulting mixture was refluxed for 6 h, cooled to room temperature and filtered through a short pad of Celite<sup>®</sup> and evaporated to dryness. The crude product was purified by column chromatography on Silica Gel 60 (eluent: hexanes/dichloromethane = 10/1). Yield: 18.7 g (73%) of a white solid. <sup>1</sup>H NMR (400 MHz, CDCl<sub>3</sub>): δ 8.17 (d, *J* = 7.8 Hz, 2H), 7.44 (d, *J* = 1.5 Hz, 1H), 7.39 (ddd, *J* = 8.2 Hz, 8.1 Hz, 1.0 Hz, 2H), 7.30–7.25 (m, 2H), 7.25 (s, 1H), 7.17 (d, *J* = 8.3 Hz, 2H), 6.58 (m, 1H), 2.98 (s, 2H), 2.04 (s, 3H), 1.38 (s, 9H). <sup>13</sup>C{<sup>1</sup>H} NMR (100 MHz, CDCl<sub>3</sub>): δ 151.9, 148.1, 146.8, 140.7, 137.5, 131.9, 127.2, 125.7, 123.1, 120.6, 120.3, 119.4, 116.9, 110.1, 41.02, 34.9, 31.6, 16.7. HRMS (ESI) calc. for C<sub>26</sub>H<sub>25</sub>NNa<sup>+</sup>: 374.1879 [M + Na]<sup>+</sup>; found: 374.1878.

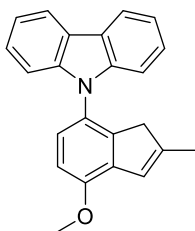

**A mixture of 9-(4-methoxy-2-methyl-1H-inden-7-yl)-9H-carbazole and 9-(7-methoxy-2-methyl-1H-inden-4-yl)-9H-carbazole (14).** To a warm solution of 32.8 g (196.2 mmol) of 9H-carbazole in 1200 mL of toluene, 76.8 mL (192 mmol) of 2.5 M <sup>n</sup>BuLi in hexanes was added. The resulting viscous mixture was stirred 0.5 h at room temperature, then, 22.4 g (936.8 mmol) of 7-bromo-4-methoxy-2-methyl-1H-indene (**6**) was added followed by a mixture of 421 mg (1.88 mmol, 2 mol.%) of Pd(OAc)<sub>2</sub> and 879 mg (2.81 mmol, 3 mol.%) of tBuMePhos. The resulting mixture was refluxed for 8 h, cooled to room temperature and quenched with 100 mL of water. The organic layer was separated, dried over K<sub>2</sub>CO<sub>3</sub> and evaporated to dryness. The crude product was purified by column chromatography on Silica Gel 60 (eluent: hexanes/dichloromethane = 5/1, then, 3/1, vol.). Yield: 11.59 g (38%) of white solid of ca. 65 to 35 mixture of 9-(4-methoxy-2-methyl-1H-inden-7-yl)-9H-carbazole and 9-(7-methoxy-2-methyl-1H-inden-4-yl)-9H-carbazole. <sup>1</sup>H NMR (400 MHz, CDCl<sub>3</sub>): δ 8.20 (d, *J* = 7.7 Hz, 2H), 7.42 (t, *J* = 7.7 Hz, 2H), 7.37–7.27 (m, 3H), 7.25–7.14 (m, 2H), 6.99 (d, *J* = 8.4 Hz) and 6.88 (d, *J* = 8.5 Hz) (sum 1H), 6.75 (m) and 5.99 (m) (sum 1H), 4.01 (s, 3H), 3.44 (s) and 3.02 (s) (sum 2H), 2.09 (s) and 2.06 (s) (sum 3H). <sup>13</sup>C{<sup>1</sup>H} NMR (100 MHz, CDCl<sub>3</sub>): δ 154.4, 152.0, 147.6, 145.3, 145.1, 142.8, 141.6, 141.0, 135.9, 131.4, 127.4, 125.8, 125.7, 124.8, 124.6, 123.3, 123.0, 122.4, 120.3, 120.1, 119.3, 110.1, 110.0, 109.9, 107.4, 55.7, 55.5, 41.7, 40.8, 16.7, 16.6. HRMS (ESI) calc. for C<sub>23</sub>H<sub>19</sub>NNaO<sup>+</sup>: 348.1359 [M + Na]<sup>+</sup>; found: 348.1362.

## SYNTHESIS OF SUBSTITUTED 2-METHYL-1H-INDEN-4/7-AMINES

First, we tried to synthesize 4-amino-1-methoxy-2-methylindane via reaction of TMSMA with aryllithium generated by reaction of 4-bromo-1-methoxy-2-methylindane with *n*-butyllithium. Formation of the *N*-methylated side product, 4-methylamino-1-methoxy-2-methylindane, followed by demanding chromatographic separation of four diastereomers lead to low yields of the desired product.

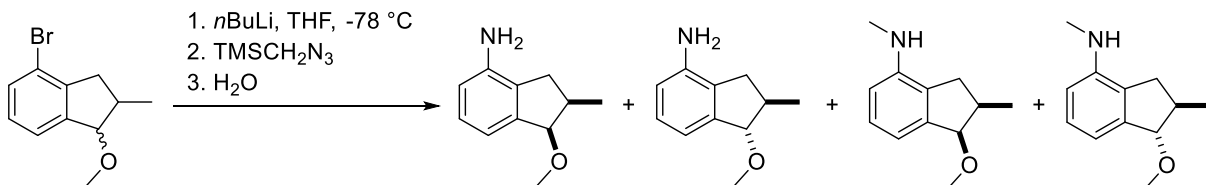

**1-Methoxy-2-methyl-2,3-dihydro-1H-inden-4-amine.** To a solution of 48.2 g (200 mmol) 4-bromo-1-methoxy-2-methyl-2,3-dihydro-1H-indene in 1 L THF, 88.0 mL (220 mmol) of a 2.5 M solution of <sup>n</sup>BuLi in hexane was added dropwise at -78 °C. Reaction mixture was stirred 1 h at -78 °C, then 28.4 g (220 mmol) of trimethylsilylmethyl azide was slowly added via syringe. The resulting mixture was stirred at room temperature overnight. Next, the solution was poured into 1 L of water, organic layer was separated and water was extracted with diethyl ether (2×250 mL). Organic layers were collected, dried over Na<sub>2</sub>SO<sub>4</sub> and solvents were evaporated. The crude product was purified by column chromatography on Silica Gel 60 (eluent: hexane/ethylacetate = 5/1). Yield: 20.0 g (56%) as a red crystallizable oil, mixture of diastereomers with ratio 1.6/1. Major isomer: <sup>1</sup>H NMR (400 MHz, CDCl<sub>3</sub>): δ 7.07 (m, 1H), 6.85 (m, 1H), 6.61 (m, 1H), 4.39 (d, *J* = 3.7 Hz, 1H), 3.58 (br.s, 2H), 3.45 (s, 3H), 3.04 (dd, *J* = 15.4 Hz, 7.7 Hz, 1H), 2.55 (m, 1H), 2.24 (dd, *J* = 15.4 Hz, 4.5 Hz, 1H), 1.18 (d, *J* = 7.1 Hz, 3H). <sup>13</sup>C{<sup>1</sup>H} NMR (100 MHz, CDCl<sub>3</sub>): δ 143.7, 142.4, 127.5, 127.2, 115.7, 114.5, 86.1, 56.6, 38.4, 34.8, 13.7. Minor isomer: <sup>1</sup>H NMR (400 MHz, CDCl<sub>3</sub>): δ 7.05 (m, 1H), 6.84 (m, 1H), 6.61 (m, 1H), 4.49 (d, *J* = 5.7 Hz, 1H), 3.58 (br.s, 2H), 3.41 (s, 3H), 2.75 (m, 1H), 2.62 (m, 1H), 2.49 (m, 1H), 1.15 (d, *J* = 7.1 Hz, 3H). <sup>13</sup>C{<sup>1</sup>H} NMR (100 MHz, CDCl<sub>3</sub>): δ 143.0, 142.5, 128.1, 127.8, 115.7, 114.3, 91.6, 56.1, 39.3, 35.0, 19.5. HRMS (ESI) calc. for C<sub>11</sub>H<sub>16</sub>NO<sup>+</sup>: 178.1226 [M + H]<sup>+</sup>; found: 178.1222.

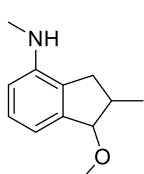

**1-Methoxy-N,2-dimethyl-2,3-dihydro-1H-inden-4-amine.** The substance was obtained as a side product of synthesis of 1-methoxy-2-methyl-2,3-dihydro-1H-inden-4-amine with 26% yield from 4-bromo-1-methoxy-2-methyl-2,3-dihydro-1H-indene. The product was isolated as a mixture of diastereomers with ratio 1.7/1. Major isomer: <sup>1</sup>H NMR (400 MHz, CDCl<sub>3</sub>): δ 7.19 (m, 1H), 6.81 (m, 1H), 6.55 (m, 1H), 4.41 (d, *J* = 3.7 Hz, 1H), 3.49 (br.s, 1H), 3.44 (s, 3H), 2.99 (dd, *J* = 15.3 Hz, 7.6 Hz, 1H), 2.90 (s, 3H), 2.56 (m, 1H), 2.17 (dd, *J* = 15.3 Hz, 4.6 Hz, 1H), 1.18 (d, *J* = 7.1 Hz, 3H). Minor isomer: <sup>1</sup>H NMR (400 MHz, CDCl<sub>3</sub>): δ 7.17 (m, 1H), 6.81 (m, 1H), 6.55 (m, 1H), 4.49 (d, *J* = 5.7 Hz, 1H), 3.49 (br.s, 1H), 3.41 (s, 3H), 2.90 (s, 3H), 2.70 (m, 1H), 2.62 (m, 1H), 2.44 (dd, *J* = 14.1 Hz, 6.1 Hz, 1H), 1.15 (d, *J* = 6.9 Hz, 3H). <sup>13</sup>C{<sup>1</sup>H} NMR (100 MHz, CDCl<sub>3</sub>, mixture of diastereomers): δ 145.4, 145.3, 142.8, 142.0, 127.6, 127.2, 127.0, 113.9, 113.8, 108.6, 108.4, 91.6, 86.0, 56.3, 56.1, 55.8, 39.0, 38.2, 34.8, 34.5, 30.3, 30.2, 19.4, 13.6. HRMS (ESI) calc. for C<sub>12</sub>H<sub>18</sub>NO<sup>+</sup>: 192.1383 [M + H]<sup>+</sup>; found: 192.1385.

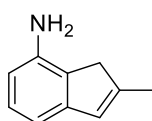

**2-Methyl-1H-inden-4/7-amine (15). Via Buchwald-Hartwig reaction:** To a solution of 6.9 g (37.9 mmol) of benzophenone imine in 250 mL of toluene, 7.2 g (34.4 mmol) 4-bromo-2-methyl-1H-indene (**1**) was added. Then 9.6 g (86.0 mmol) of potassium *tert*-butylate was added followed by a mixture of 1.58 mg (1.7 mmol, 5 mol.%) of Pd<sub>2</sub>dba<sub>3</sub> and 722 mg (1.7 mmol, 5 mol.%) of 1,3-bis(2,6-diisopropylphenyl)imidazolium chloride (IPr·HCl). The resulting mixture was refluxed for 24 h, and then cooled to room temperature. The resulting solution was poured into 100 mL of water and extracted with diethyl ether (3×50 mL). The combined organic fractions were dried over Na<sub>2</sub>SO<sub>4</sub> and the solvents were evaporated. The residue was dissolved in 50 mL of THF and 5 mL of concentrated HCl was added. After two hours of stirring, the solution was poured into 200 mL of water and extracted with diethyl



ether (2×50 mL). Then 2 M solution of NaOH was added to the water layer till pH > 10. The resulting mixture was extracted with diethyl ether (3×50 mL), the combined organic layers were dried over Na<sub>2</sub>SO<sub>4</sub> and the solvent were evaporated. The crude product was purified by column chromatography on Silica Gel 60 (eluent: hexanes/dichloromethane). Yield: 2.8 g (56%). **Via electrophilic amination:** Solution of 37.2 g of 4-bromo-2-methyl-1*H*-indene (**1**) (178 mmol) and 37.1 mL of 1,2-dibromoethane (430 mmol) in 1 L of THF was slowly added dropwise to 16.7 g of magnesium turnings (695 mmol) in 9 hours. The resulting solution was refluxed for additional 5 hours then the mixture was allowed to cool down to room temperature. The solution of 20.7 g of trimethylsilylmethyl azide (160 mmol) in 200 mL of THF was slowly added dropwise to the obtained Grignard reagent. The resulting mixture was stirred overnight, then 300 mL of water were added dropwise to quench the reaction. The organic layer was separated and water was extracted with diethyl ether (2 ×100 ml). Organic layers were collected, dried over Na<sub>2</sub>SO<sub>4</sub> and rotary-evaporated. The crude product was distilled from the residue on Kugelrohr at 130 °C (1 Torr). Recrystallization from ethanol at -30 °C gave 15.5 g of analytically pure product as orange crystals m.p. 43 °C in 51% yield. <sup>1</sup>H NMR (400 MHz, CDCl<sub>3</sub>): δ 7.15 (t, *J* = 7.6 Hz, 1H), 6.85 (d, *J* = 7.4 Hz, 1H), 6.55 (d, *J* = 7.8 Hz, 1H), 6.53 (br.s, 1H), 3.63 (br.s, 2H), 3.12 (s, 2H), 2.22 (s, 3H). <sup>13</sup>C{<sup>1</sup>H} NMR (100 MHz, CDCl<sub>3</sub>): δ 146.7, 145.0, 141.0, 127.6, 127.5, 126.8, 111.34, 111.30, 39.5, 16.7. HRMS (ESI) calc. for C<sub>10</sub>H<sub>12</sub>N<sup>+</sup>: 146.0964 [M + H]<sup>+</sup>; found: 146.0964.

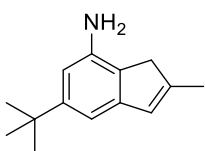

**5-*Tert*-butyl-2-methyl-1*H*-indene-4/7-amine (18).** **Via Buchwald-Hartwig reaction:** To a solution of 6.9 g (37.9 mmol) of benzophenone imine in 250 mL of toluene, 9.1 g (34.4 mmol) 7-bromo-5-*tert*-butyl-2-methyl-1*H*-indene (**5**) was added. Then 9.6 g (86.0 mmol) of potassium *tert*-butylate was added followed by a mixture of 1.58 mg (1.7 mmol, 5 mol.%) of Pd<sub>2</sub>dba<sub>3</sub> and 722 mg (1.7 mmol, 5 mol.%) of IPr·HCl. The resulting mixture was refluxed for 24 h, and then cooled to room temperature. The resulting solution was poured into 100 mL of water and extracted with diethyl ether (3×50 mL). The combined organic fractions were dried over Na<sub>2</sub>SO<sub>4</sub> and the solvents were evaporated. The residue was dissolved in 50 mL of THF, and 5 mL of concentrated HCl was added. After two hours of stirring, the solution was poured into 200 mL of water and extracted with diethyl ether (2×50 mL). Then a 2 M solution of NaOH was added to the water layer till pH > 10. The resulting mixture was extracted with diethyl ether (3×50 mL), the combined organic layers were dried over Na<sub>2</sub>SO<sub>4</sub> and the solvent were evaporated. The crude product was purified by column chromatography on Silica Gel 60 (eluent: hexanes/dichloromethane). Yield: 3.0 g (43%). **Via electrophilic amination:** Solution of 53.0 g of 7-bromo-5-*tert*-butyl-2-methyl-1*H*-indene (**5**) (200 mmol) and 35.0 mL of 1,2-dibromoethane (400 mmol) in 1000 mL of THF was slowly added dropwise to 15.0 g of magnesium turnings (620 mmol) in 9 hours. The resulting solution was refluxed for an additional 5 hours then the mixture was allowed to cool down to room temperature. The solution of 23.2 g of trimethylsilylmethyl azide (180 mmol) in 250 mL of THF was slowly added dropwise to the obtained Grignard reagent. The resulting mixture was stirred overnight at room temperature, then 300 mL of brine were added dropwise to quench the reaction. The organic layer was separated and water was extracted with diethyl ether (2 ×200 ml). Organic layers were collected, dried over Na<sub>2</sub>SO<sub>4</sub> and rotary-evaporated. Product was purified by column chromatography on Silica Gel 60 (eluent: hexane/ethylacetate/triethylamine = 100/10/1). Yield: 16.8 g (47%) as mixture of two isomers with ratio 2.3/1.0. Major isomer: <sup>1</sup>H NMR (400 MHz, CDCl<sub>3</sub>): δ 6.88 (d, *J* = 1.4 Hz, 1H), 6.59 (d, *J* = 1.4 Hz, 1H), 6.48 (m, 1H), 3.62 (br.s, 2H), 3.09 (s, 2H), 2.18 (s, 3H), 1.36 (s, 9H). <sup>13</sup>C{<sup>1</sup>H} NMR (CDCl<sub>3</sub>): δ 151.3, 146.7, 145.1, 140.4, 127.8, 124.2, 108.9, 108.7, 39.2, 34.5, 31.5, 16.7. Minor isomer: <sup>1</sup>H NMR (400 MHz, CDCl<sub>3</sub>): δ 6.97 (m, 1H), 6.66 (m, 1H), 6.46 (m, 1H), 3.62 (br.s, 2H), 3.31 (s, 2H), 2.16 (s, 3H), 1.35 (s, 9H). <sup>13</sup>C{<sup>1</sup>H} NMR (CDCl<sub>3</sub>): δ 148.2, 144.6, 143.2, 137.4, 129.5, 122.2, 112.0, 110.7, 43.1, 34.4, 31.4, 16.7. HRMS (ESI) calc. for C<sub>14</sub>H<sub>20</sub>N<sup>+</sup>: 202.1590 [M + H]<sup>+</sup>; found: 202.1584.

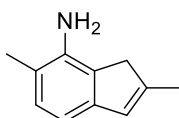

**2,5-Dimethyl-1*H*-indene-7-amine (19).** **Via Buchwald-Hartwig reaction:** To a solution of 6.9 g (37.9 mmol) of benzophenone imine in 100 mL of toluene, 7.7 g (34.4 mmol) 4-bromo-2,5-dimethyl-1*H*-indene (**16**) was added. Then 9.6 g (86.0 mmol) of potassium *tert*-butylate were added followed by a mixture of 1.58 mg (1.7 mmol, 5 mol.%) of Pd<sub>2</sub>dba<sub>3</sub> and 722 mg (1.7 mmol, 5 mol.%) of IPr·HCl. The resulting mixture was refluxed for 72 h, and then cooled to room temperature.

The resulting solution was poured into 100 mL of water and extracted with diethyl ether (3×50 mL). The combined organic fractions were dried over Na<sub>2</sub>SO<sub>4</sub> and the solvents were evaporated. The residue was dissolved in 50 mL of THF, and 5 mL of concentrated HCl were added. After two hours of stirring, the solution was poured into 200 mL of water and extracted with diethyl ether (2×50 mL). Then 2 M solution of NaOH was added to the water layer till pH > 10. The resulting mixture was extracted with diethyl ether (3×50 mL), the combined organic layers were dried over Na<sub>2</sub>SO<sub>4</sub> and the solvent were evaporated. The crude product was purified by column chromatography on Silica Gel 60 (eluent: hexanes/dichloromethane). Yield: 2.3 g (42%).

**Via Electrophilic amination:** Solution of 50.0 g of 4-bromo-2,5-dimethyl-1*H*-indene (**16**) (224 mmol) and 37.1 mL of 1,2-dibromoethane (430 mmol) in 1000 mL of THF was slowly added dropwise to 16.7 g of magnesium turnings (696 mmol) in 9 hours. The resulting solution was refluxed for additional 5 hours then the mixture was allowed to cool down to room temperature. The solution of 26.2 g of trimethylsilylmethyl azide (201 mmol) in 200 mL of THF was slowly added dropwise to the obtained Grignard reagent. The resulting mixture was stirred overnight then 300 mL of water were added dropwise to quench the reaction. The organic layer was separated and water was extracted with diethyl ether (2 ×100 ml). Organic layers were collected, dried over Na<sub>2</sub>SO<sub>4</sub> and rotary-evaporated. Product was purified by column chromatography on Silica Gel 60 (eluent: hexane/ethylacetate/triethylamine = 100/10/1). Yield: 20.5 g (57%). <sup>1</sup>H NMR (400 MHz, CDCl<sub>3</sub>): δ 7.00 (d, *J* = 7.5 Hz, 1H), 6.74 (d, *J* = 7.5 Hz, 1H), 6.47 (m, 1H), 3.57 (br.s, 2H), 3.10 (s, 2H), 2.25 (s, 3H), 2.19 (s, 3H). <sup>13</sup>C{<sup>1</sup>H} NMR (100 MHz, CDCl<sub>3</sub>): δ 144.7, 144.0, 139.4, 128.7, 127.5, 126.8, 118.4, 110.9, 39.6, 17.0, 16.7. HRMS (ESI) calc. for C<sub>11</sub>H<sub>14</sub>N<sup>+</sup>: 160.1121 [M + H]<sup>+</sup>; found: 160.1120.

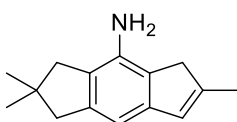

**2,2,6-Trimethyl-1,2,3,5-tetrahydro-s-indacen-4/7-amine (20).** **Via Buchwald-Hartwig reaction:** To a solution of 6.9 g (37.9 mmol) of benzophenone imine in 250 mL of toluene, 9.5 g (34.4 mmol) 4-bromo-2,2,6-trimethyl-1,2,3,5-tetrahydro-s-indacene (**17**) was added. Then 9.6 g (86.0 mmol) of potassium *tert*-butylate was added followed by a mixture of 1.58 mg (1.7 mmol, 5 mol.%) of Pd<sub>2</sub>dba<sub>3</sub> and 722 mg (1.7 mmol, 5 mol.%) of IPr·HCl. The resulting mixture was refluxed for 72 h, and then cooled to room temperature. The resulting solution was poured into 100 mL of water and extracted with diethyl ether (3×50 mL). The combined organic fractions were dried over Na<sub>2</sub>SO<sub>4</sub> and the solvents were evaporated. The residue was dissolved in 50 mL of THF and 5 mL of concentrated HCl were added. After two hours of stirring, the solution was poured into 200 mL of water and extracted with diethyl ether (2×50 mL). Then 2 M solution of NaOH was added to the water layer till pH > 10. The resulting mixture was extracted with diethyl ether (3×50 mL), the combined organic layers were dried over Na<sub>2</sub>SO<sub>4</sub> and the solvent were evaporated. The crude product was purified by column chromatography on Silica Gel 60 (eluent: hexanes/dichloromethane). Yield: 4.3 g (58%).

**Via electrophilic amination:** Solution of 10.2 g of 4-bromo-2,2,6-trimethyl-1,2,3,5-tetrahydro-s-indacene (**17**) (36.8 mmol) and 6.4 mL of 1,2-dibromoethane (73.6 mmol) in 250 mL of THF was slowly added dropwise to 2.9 g of magnesium turnings (118 mmol) in 1 hour. The resulting solution was refluxed for additional hour, then the mixture was allowed to cool down to room temperature. The solution of 5.1 g of trimethylsilylmethyl azide (36.8 mmol) in 50 mL of THF was slowly added dropwise to the obtained Grignard reagent. The resulting mixture was stirred overnight, then 300 mL of brine was added dropwise to quench the reaction. The organic layer was separated and water was extracted with diethyl ether (2 ×100 ml). The solution was passed through a short pad of silica which was then washed with additional 100 mL of ethylacetate. The resulting solution were dried over Na<sub>2</sub>SO<sub>4</sub> and rotary-evaporated. The residue was dissolved in 100 mL of hexane and cooled to –20 °C overnight. The obtained yellow crystals were filtrated and dried in vacuum. Solvents from the mother liquor were evaporated and the residue was recrystallized from 50 mL of hexane at –20 °C which gave another crop of yellow crystals. Yield: 4.4 g (58%) as a yellow solid, the product consists of two isomers with ratio 2/1. Major isomer: <sup>1</sup>H NMR (400 MHz, CDCl<sub>3</sub>): δ 6.67 (s, 1H), 6.45 (m, 1H), 3.51 (br.s, 2H), 3.08 (s, 2H), 2.77 (s, 2H), 2.60 (s, 2H), 2.18 (s, 3H), 1.23 (s, 6H). <sup>13</sup>C{<sup>1</sup>H} NMR (100 MHz, CDCl<sub>3</sub>): δ 145.6, 143.9, 143.0, 137.4, 127.7, 124.7, 124.2, 107.8, 48.1, 43.9, 40.0, 39.1, 29.3, 16.8. Minor isomer: <sup>1</sup>H NMR (400 MHz, CDCl<sub>3</sub>): δ 6.77 (s, 1H), 6.46 (m, 1H), 3.51 (br.s, 2H), 3.28 (s, 2H), 2.77 (s, 2H), 2.59 (s, 2H), 2.16 (s, 3H), 1.23 (s, 6H). <sup>13</sup>C{<sup>1</sup>H} NMR (100 MHz, CDCl<sub>3</sub>): δ 143.3,

142.5, 140.3, 134.3, 129.7, 125.8, 122.3, 111.3, 48.0, 42.8, 40.0, 39.1, 29.3, 16.8. HRMS (ESI) calc. for C<sub>15</sub>H<sub>20</sub>N<sup>+</sup>: 214.1590 [M + H]<sup>+</sup>; found: 214.1594.

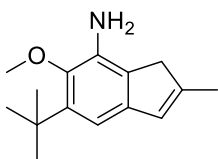

**5-*Tert*-butyl-6-methoxy-2-methyl-1*H*-inden-4/7-amine (22).** *Via electrophilic amination:* Solution of 34.2 g of 7-bromo-5-*tert*-butyl-6-methoxy-2-methyl-1*H*-indene (21) (116 mmol) and 10.0 mL of 1,2-dibromoethane (116 mmol) in 100 mL of THF was slowly added dropwise to refluxing 350 mL of THF with 6.1 g of magnesium turnings (255 mmol) in 3 hours. The resulting solution was refluxed for additional 2 hours, then the mixture was allowed to cool down to room temperature. The solution of 11.9 g of trimethylsilylmethyl azide (92.8 mmol) in 100 mL of THF was slowly added dropwise to the obtained Grignard reagent. The resulting mixture was stirred overnight, then 1 L of brine was added dropwise to quench the reaction. The organic layer was separated and water was extracted with diethyl ether (2 × 200 ml). Organic layers were collected, dried over Na<sub>2</sub>SO<sub>4</sub> and rotary-evaporated. The product was purified by column chromatography on Silica Gel 60 (eluent: hexane/ethylacetate/triethylamine = 100/10/1). Yield: 15.3 g (72%) as a dark brown solid, mixture of isomers major/minor = 1.25/1.0. Major isomer: <sup>1</sup>H NMR (400 MHz, CDCl<sub>3</sub>): δ 6.80 (s, 1H), 6.43 (m, 1H), 3.86 (s, 3H), 3.67 (br.s, 2H), 3.11 (br.s, 2H), 2.17 (s, 3H), 1.47 (s, 9H). Minor isomer: <sup>1</sup>H NMR (400 MHz, CDCl<sub>3</sub>): δ 6.90 (s, 1H), 6.45 (m, 1H), 3.86 (s, 3H), 3.72 (br.s, 2H), 3.28 (br.s, 2H), 2.17 (s, 3H), 1.46 (s, 9H). <sup>13</sup>C{<sup>1</sup>H} NMR (100 MHz, mixture of isomers, CDCl<sub>3</sub>): δ 145.8, 144.43, 144.40, 144.2, 141.4, 141.1, 138.7, 138.2, 135.5, 132.2, 131.7, 127.5, 126.5, 122.3, 112.3, 108.8, 59.6, 59.4, 43.1, 39.8, 35.0, 34.9, 31.23, 31.17, 16.8, 16.7. HRMS (ESI) calc. for C<sub>15</sub>H<sub>22</sub>NO<sup>+</sup>: 232.1696 [M + H]<sup>+</sup>; found: 232.1690.

#### SYNTHESIS OF 4-(N-HETEROCYCLE)INDENES FROM SUBSTITUTED 2-METHYL-1*H*-INDEN-4/7-AMINES

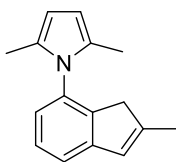

**2,5-Dimethyl-1-(2-methyl-1*H*-inden-7-yl)-1*H*-pyrrole (23).** **Method A:** To a solution of 12.0 g (83.0 mmol) 2-methyl-1*H*-inden-7-amine (15) and 11.3 g (99.6 mmol) hexan-2,5-dione in 5 mL of dry THF, 2.01 g (8 mmol) of iodine was added. The reaction mixture was stirred at room temperature for 2 days. Then the resulting solution was diluted with 20 mL of a hexane/ethylacetate = 10/1 mixture, and the product was isolated by column chromatography on Silica Gel 60 (eluent: hexane/ethylacetate = 10/1). Yield: 9.82 g (53%) as an orange solid. **Method B:** To a solution of 15.0 g (103.8 mmol) 2-methyl-1*H*-inden-7-amine (15) and 12.3 g (125 mmol) hexan-2,5-dione in 5 mL of dry THF, 0.88 g (2.6 mmol) of ZrOCl<sub>2</sub>(H<sub>2</sub>O)<sub>8</sub> were added. Then the resulting solution was diluted with 20 mL of hexane/ethylacetate = 10/1 mixture and the product was isolated by column chromatography on Silica Gel 60 (eluent: hexane/ethylacetate = 10/1). Yield: 2.4 g (70%). <sup>1</sup>H NMR (400 MHz, CDCl<sub>3</sub>): δ 7.33 (m, 2H), 6.98 (m, 1H), 6.57 (m, 1H), 5.97 (s, 2H), 3.06 (s, 2H), 2.15 (m, 3H), 2.01 (s, 6H). <sup>13</sup>C{<sup>1</sup>H} NMR (100 MHz, CDCl<sub>3</sub>): δ 147.3, 146.7, 141.7, 134.4, 128.2, 127.6, 127.0, 123.8, 119.6, 105.3, 40.9, 16.6, 12.5. HRMS (ESI) calc. for C<sub>16</sub>H<sub>17</sub>NNa<sup>+</sup>: 246.1253 [M + Na]<sup>+</sup>; found: 246.1255.

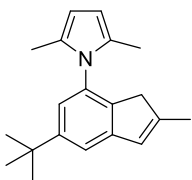

**1-(5-*Tert*-butyl-1-methoxy-2-methyl-2,3-dihydro-1*H*-inden-4/7-yl)-2,5-dimethyl-1*H*-pyrrole (24).** **Method B:** To a solution of 23.1 g (74.2 mmol) 5-*tert*-butyl-2-methyl-1*H*-indene-4/7-amine (18) and 10.2 g (89.0 mmol) of hexan-2,5-dione in 10 mL of dry THF, 0.60 g (1.86 mmol) of ZrOCl<sub>2</sub>(H<sub>2</sub>O)<sub>8</sub> were added. Then the resulting solution was diluted with 20 mL of a hexane/ethylacetate = 10/1 mixture and the product was isolated by column chromatography on Silica Gel 60 (eluent: hexane/ethylacetate = 10/1). Yield: 12.0 g (58%) as a mixture of two isomers with ratio = 1/1. <sup>1</sup>H NMR (400 MHz, CDCl<sub>3</sub>): δ 7.57 (m) and 7.47 (m) (sum 1H), 7.22 (d, *J* = 1.6 Hz) and 7.10 (d, *J* = 1.7 Hz) (sum 1H), 6.63 (m) and 6.25 (m) (sum 1H), 6.06 (s) and 6.05 (s) (sum 2H), 3.48 (s) and 3.14 (s) (sum 2H), 2.22 (m, 3H), 2.12 (s) and 2.11 (s) (sum 6H), 1.48 (m, 9H). <sup>13</sup>C{<sup>1</sup>H} NMR (100 MHz, CDCl<sub>3</sub>): δ 151.3, 147.6, 147.1, 146.6, 146.5, 144.2, 141.3, 138.4, 133.8, 129.7, 128.9, 128.2, 127.2, 124.1, 123.3, 121.1, 119.8, 116.6, 105.2, 105.1, 43.1, 40.6, 34.7, 34.6, 31.6, 31.5, 16.7, 16.6, 12.8, 12.5. HRMS (ESI) calc. for C<sub>20</sub>H<sub>25</sub>NNa<sup>+</sup>: 302.1879 [M + Na]<sup>+</sup>; found: 302.1872.

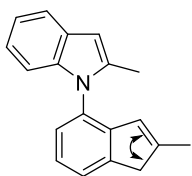

**1-(2-Methyl-1H-indene-4/7-yl)-2-methyl-1H-indole (25).** To a solution of 8.0 g (41.0 mmol) 1-bromo-2-(methylethynyl)benzene, 18.4 g (164 mmol) of potassium *tert*-butylate and 7.14 g (49.2 mmol) of 2-methyl-1H-inden-7-amine (**15**) in 250 mL toluene under argon, a mixture of 460 mg (2.05 mmol) Pd(OAc)<sub>2</sub> and 871 mg (2.05 mmol) of *i*Pr·HCl was added. Reaction mixture was stirred at 110 °C for 24 hours. After that, the resulting mixture was poured into 500 mL of water. The mixture was extracted with diethyl ether (3×100 mL). The combined organic layers were dried over Na<sub>2</sub>SO<sub>4</sub>, and solvents were evaporated. The product was isolated from the residue by column chromatography (eluent: hexane/dichloromethane = 10/1). Yield: 8.0 g (76%) as a white solid. The product is a mixture of two isomers with ratio «indene-4-yl»/«inden-7-yl» = 1.8/1. «Indene-7-yl»: <sup>1</sup>H NMR (400 MHz, CDCl<sub>3</sub>): δ 7.63 (m, 1H), 7.38–7.42 (m, 2H), 7.05–7.15 (m, 3H), 6.89 (d, *J* = 7.9 Hz, 1H), 6.59 (s, 1H), 6.45 (s, 1H), 3.07 (d, *J* = 23.1 Hz, 1H), 2.97 (d, *J* = 23.1 Hz, 1H), 2.28 (s, 3H), 2.12 (s, 3H). «Inden-4-yl»: <sup>1</sup>H NMR (400 MHz, CDCl<sub>3</sub>): δ 7.63 (d, *J* = 7.5 Hz, 1H), 7.49 (d, *J* = 7.3 Hz, 1H), 7.25–7.29 (m, 1H), 7.20 (m, 1H), 7.05–7.15 (m, 2H), 6.97 (d, *J* = 7.9 Hz, 1H), 6.45 (s, 1H), 6.06 (s, 1H), 3.46 (s, 2H), 2.28 (s, 3H), 2.12 (s, 3H). <sup>13</sup>C{<sup>1</sup>H} NMR (major\*/minor°, 100 MHz, CDCl<sub>3</sub>): δ 147.7°, 147.6\*, 146.9\*, 145.0\*, 144.2°, 141.5°, 138.2°, 137.5\*, 137.4°, 136.9\*, 133.0, 129.1, 128.2, 128.1, 127.8, 126.9, 126.2, 124.5, 124.3, 123.9, 123.0, 120.7, 119.8, 119.7, 119.6, 119.4, 110.3\*, 110.0°, 100.6, 43.2\*, 41.0°, 16.8\*, 16.6°, 13.1\*, 13.0°. HRMS (ESI) calc. for C<sub>19</sub>H<sub>17</sub>NNa<sup>+</sup>: 282.1253 [M + Na]<sup>+</sup>; found: 282.1256.

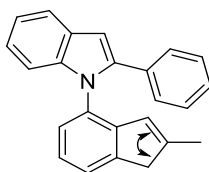

**1-(2-Methyl-1H-indene-4/7-yl)-2-phenyl-1H-indole (26).** To a solution of 5.2 g (20.2 mmol) 1-bromo-2-(phenylethynyl)benzene, 9.1 g (80.8 mmol) potassium *tert*-butylate and 3.5 g (24.3 mmol) 2-methyl-1H-inden-7-amine (**15**) in 100 mL of toluene under argon, a mixture of 227 mg (1.0 mmol) Pd(OAc)<sub>2</sub> and 430 mg (1.0 mmol) *i*Pr·HCl was added. Reaction mixture was stirred at 110 °C for 24 hours. After that, the resulting mixture was poured into 500 mL of water. The mixture was extracted with diethyl ether (3×100 mL). The combined organic layers were dried over Na<sub>2</sub>SO<sub>4</sub>, and solvents were evaporated. The residue was triturated in a mixture of hexane/ethylacetate = 10/1 and filtered. The precipitate was washed with 10 mL of hexane and dried in vacuum. Yield: 5.1 g (78%) as a bright yellow solid. The product is mixture of two isomers in ratio 10/1. Major isomer: <sup>1</sup>H NMR (400 MHz, CDCl<sub>3</sub>): δ 7.73 (m, 1H), 7.38 (m, 1H), 7.32 (m, 2H), 7.16–7.24 (m, 5H), 7.08–7.12 (m, 2H), 6.99 (d, *J* = 7.8 Hz, 1H), 6.87 (s, 1H), 6.18 (s, 1H), 3.40 (m, 2H), 2.08 (s, 3H). Minor isomer: <sup>1</sup>H NMR (400 MHz, CDCl<sub>3</sub>, selected resonances only): δ 6.88 (s, 1H), 6.50 (m, 1H), 3.00 (d, *J* = 23.0 Hz, 1H), 2.82 (d, *J* = 23.0 Hz, 1H), 2.03 (s, 3H). <sup>13</sup>C{<sup>1</sup>H} NMR (100 MHz, CDCl<sub>3</sub>, mixture of isomers major\*/minor°): δ 147.4, 144.9, 143.8, 141.2, 139.4, 132.7, 130.0, 128.5, 128.2, 128.1, 127.0, 126.4, 124.6, 124.3, 122.6, 122.1, 120.4, 120.3, 119.5°, 111.2, 103.0\*, 102.9°, 43.2\*, 41.2°, 16.88\*, 16.6°. HRMS (ESI) calc. for C<sub>24</sub>H<sub>19</sub>NNa<sup>+</sup>: 344.1410 [M + Na]<sup>+</sup>; found: 344.1409.

### 2,2'-Dibromo-4,4'-dimethylbiphenyl.

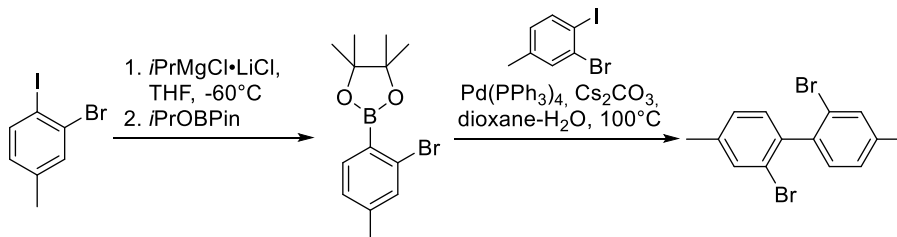

**2-(2-Bromo-4-methylphenyl)-4,4,5,5-tetramethyl-1,3,2-dioxaborolane.** 90.0 mL of an *i*PrMgCl·LiCl solution in THF (162 mmol, 1.8 M) was added dropwise to the solution of 40.0 g of 2-bromo-1-iodo-4-methylbenzene (135 mmol) in THF at -60 °C under inert atmosphere. The resultant mixture was stirred at -60 °C for an additional hour and then 41.5 mL (203 mmol) of *i*PrOBPin was added in one portion at -60 °C. The obtained slurry was allowed to warm up to room temperature, and was then poured into 1 L of water and extracted with diethyl ether (2×200 ml). The extracts were combined with the organic layer and dried over anhydrous Na<sub>2</sub>SO<sub>4</sub>. The solvent was evaporated in vacuum giving 39.1 g of analytically pure 2-(2-bromo-4-methylphenyl)-

4,4,5,5-tetramethyl-1,3,2-dioxaborolane as a colorless oil in 98% yield.  $^1\text{H}$  NMR (400 MHz,  $\text{CDCl}_3$ )  $\delta$  7.53 (d,  $J$  = 7.5 Hz, 1H), 7.38 (s, 1H), 7.08 (d,  $J$  = 7.5 Hz, 1H), 2.31 (s, 3H), 1.36 (s, 12H).

**2,2'-Dibromo-4,4'-dimethylbiphenyl.** 3.0 g of Tetrakis(triphenylphosphine)palladium(0) (2.7 mmol) was added to the solution of 40.0 g of 2-bromo-1-iodo-4-methylbenzene (135 mmol) and 39.1 g 2-(2-bromo-4-methylphenyl)-4,4,5,5-tetramethyl-1,3,2-dioxaborolane (131 mmol) in 800 mL of dioxane and 400 mL of water under inert atmosphere. The resulting mixture was heated at 80 °C for 16 hours and then poured into 1L of water and extracted with dichloromethane (2×300 ml). The extracts were combined with the organic layer and dried over anhydrous  $\text{Na}_2\text{SO}_4$ . The solvent was evaporated in vacuo and the residue was recrystallized from hexane at -30 °C giving 36.9 g of 2,2'-dibromo-4,4'-dimethylbiphenyl as white crystals in 78 % yield. Anal. calc. for  $\text{C}_{14}\text{H}_{12}\text{Br}_2$ : C, 49.45; H, 3.56. Found: C, 49.34; H, 3.62.  $^1\text{H}$  NMR (400 MHz,  $\text{CDCl}_3$ )  $\delta$  7.50 (s, 2H), 7.11–7.18 (m, 4H), 2.39 (s, 6H).  $^{13}\text{C}\{^1\text{H}\}$  NMR (100 MHz,  $\text{CDCl}_3$ ):  $\delta$  139.4, 139.0, 132.9, 130.8, 127.9, 123.3, 20.9.

### 2,2'-Dibromo-4,4',5,5'-tetramethylbiphenyl.

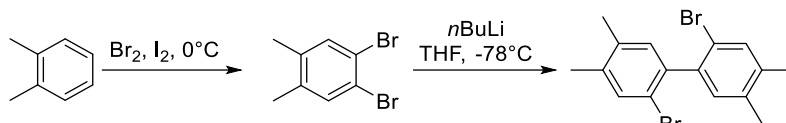

**1,2-Dibromo-4,5-dimethylbenzene.** 40.0 mL  $\text{Br}_2$  was added dropwise to a solution of 200 mg of  $\text{I}_2$  in 46 mL of *o*-xylene (380 mmol) at 0°C within 30 min. The resultant was left overnight at room temperature, followed by dissolving in  $\text{Et}_2\text{O}$  (200 ml), washing with 2 N NaOH (2×100 ml),  $\text{H}_2\text{O}$  (2×100 ml) and drying over  $\text{Na}_2\text{SO}_4$ . The organic solvents were then concentrated in vacuo to afford a faintly pink colored oil, which was further purified by recrystallization in methanol to give 68.0 g of pure 4,5-dibromo-*o*-xylene in 67% yield.  $^1\text{H}$  NMR (400 MHz,  $\text{CDCl}_3$ )  $\delta$  7.37 (s, 2H), 2.18 (s, 6H).

**2,2'-Dibromo-4,4',5,5'-tetramethylbiphenyl.** To a stirred solution of 1,2-dibromo-*o*-xylene (52.8 g, 200 mmol) in dry THF (800 ml) was added *n*BuLi (40.0 ml, 100 mmol, 2.5 M in *n*-hexane) at -78 °C, and was then stirred for 1 h at -78 °C after the addition. The reaction mixture was allowed to warm to room temperature, stirred for an additional 1 h, and then was hydrolyzed with 5% HCl. The organic layer was separated and the aqueous layer was extracted with  $\text{Et}_2\text{O}$ . The extracts were combined with the organic layer and dried over anhydrous  $\text{Na}_2\text{SO}_4$ . The solvent was evaporated in vacuo and the product was purified by chromatography on silica gel using hexane as eluent, to give 25.0 g of pure 2,2'-dibromo-4,4',5,5'-tetramethylbiphenyl in 68% yield. Anal. calc. for  $\text{C}_{16}\text{H}_{16}\text{Br}_2$ : C, 52.21; H, 4.38. Found: C, 52.34; H, 4.44.  $^1\text{H}$  NMR (400 MHz,  $\text{CDCl}_3$ )  $\delta$  7.41 (s, 2H), 6.98 (s, 2H), 2.28 (s, 6H), 2.23 (s, 6H).  $^{13}\text{C}$  NMR (100 MHz,  $\text{CDCl}_3$ )  $\delta$  139.2, 137.9, 135.4, 132.9, 132.0, 120.1, 19.23, 19.19.

### 6,6'-Dibromo-2,2',3,3'-tetrahydro-1H,1'H-5,5'-biindene.

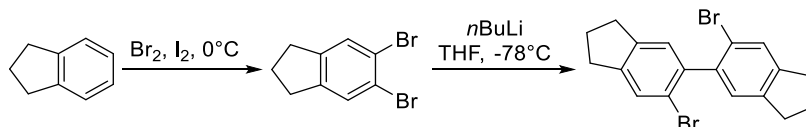

**5,6-Dibromoindane.** 106.0 mL  $\text{Br}_2$  was added dropwise to a solution of 500 mg of  $\text{I}_2$  in 122.5 mL of indane (1 mol) at 0 °C within 40 min. The resultant was left overnight at room temperature, followed by dissolving in  $\text{Et}_2\text{O}$  (500 ml), washing with 2 N NaOH (2×200 ml),  $\text{H}_2\text{O}$  (2×200 ml) and drying over  $\text{Na}_2\text{SO}_4$ . The organic solvents were then concentrated in vacuum. The residue was further purified by recrystallization in hexanes to give 97.0 g of pure 5,6-dibromoindane in 35% yield. The  $^1\text{H}$  NMR spectrum matches one from the literature data [M. Nishimura et al. *Jap. Pat. Appl. JP2010241770*]  $^1\text{H}$  NMR (400 MHz,  $\text{CDCl}_3$ )  $\delta$  7.45 (s, 2H), 2.84 (t,  $J$  = 7.5 Hz, 4H), 2.07 (m, 2H).  $^{13}\text{C}$  NMR (100 MHz,  $\text{CDCl}_3$ )  $\delta$  145.4, 129.1, 121.5, 32.3, 25.6.

**6,6'-Dibromo-2,2',3,3'-tetrahydro-1H,1'H-5,5'-biindene.** To a stirred solution of 5,6-dibromoindane (69 g, 250 mmol) in dry THF (900 ml) was added *n*BuLi (50 ml, 125 mmol, 2.5 M in *n*-hexane) at -78 °C, and was then stirred for 1 h at -78 °C after addition. The reaction mixture was allowed to warm to room temperature, stirred

for an additional 1 h, and then was hydrolyzed with 5% HCl. The organic layer was separated and the aqueous layer was extracted with Et<sub>2</sub>O. The extracts were combined with the organic layer and dried over anhydrous Na<sub>2</sub>SO<sub>4</sub>. The solvent was evaporated in vacuum and the product was purified recrystallization from methanol to give 42 g of pure 6,6'-dibromo-2,2',3,3'-tetrahydro-1*H*,1'*H*-5,5'-biindene in 86% yield. Anal. calc. for C<sub>18</sub>H<sub>16</sub>Br<sub>2</sub>: C, 55.13; H, 4.11. Found: C, 55.37; H, 4.20. <sup>1</sup>H NMR (400 MHz, CDCl<sub>3</sub>) δ 7.49 (s, 2H), 7.06 (s, 2H), 2.82–2.97 (m, 8H), 2.08–2.16 (m, 4H). <sup>13</sup>C NMR (100 MHz, CDCl<sub>3</sub>): δ 145.7, 143.3, 139.9, 128.0, 126.6, 120.8, 32.5, 32.3, 25.5.

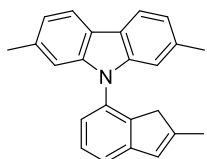

**2,7-Dimethyl-9-(2-methyl-1*H*-inden-7-yl)-9*H*-carbazole (27).** A solution of 810 mg (4 mmol) of tri(*tert*-butyl)phosphane in 10 mL of toluene was added to a mixture of 23.5 g (69 mmol) 2,2'-dibromo-4,4'-dimethyl-1,1'-biphenyl, 10 g (69 mmol) of 2-methyl-1*H*-inden-7-amine (**15**), 23.2 g (240 mmol) of sodium *tert*-butoxide and 1.2 g (2.0 mmol) Pd<sub>2</sub>(dba)<sub>3</sub> in 500 mL of toluene. After heating under argon at 100 °C for 24 h, the reaction mixture was poured into 1 L of water and extracted with toluene (2×250 ml). The extracts were combined and dried over anhydrous Na<sub>2</sub>SO<sub>4</sub>. The solvent was rotary evaporated. Purification of the residue by column chromatography (eluent: hexane/dichloromethane=10/1) afforded the required products as a white solid. Yield: 14.1 g (63%). <sup>1</sup>H NMR (400 MHz, CDCl<sub>3</sub>): 8.00 (d, *J* = 7.9 Hz, 2H), 7.42–7.47 (m, 2H), 7.21 (dd, *J* = 7.5 Hz, 1.2 Hz, 1H), 7.09 (m, 2H), 6.91 (m, 2H), 6.61 (m, 1H), 3.03 (s, 2H), 2.46 (s, 6H), 2.07 (d, *J* = 1.1 Hz, 3H). <sup>13</sup>C NMR (100 MHz, CDCl<sub>3</sub>): δ 148.2, 147.0, 141.2, 141.0, 135.4, 132.6, 128.1, 127.0, 123.7, 120.9, 119.73, 119.68, 109.9, 41.3, 22.0, 16.7. HRMS (ESI) calc. for C<sub>24</sub>H<sub>21</sub>NNa<sup>+</sup>: 346.1566 [M + Na]<sup>+</sup>; found: 346.1565.

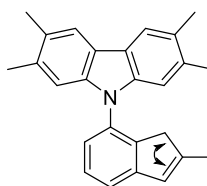

**2,3,6,7-Tetramethyl-9-(2-methyl-1*H*-inden-7-yl)-9*H*-carbazole (28).** A solution of 810 mg (4 mmol) of tri(*tert*-butyl)phosphane in 10 mL of toluene was added to a mixture of 25.4 g (69 mmol) 2,2'-dibromo-4,4',5,5'-tetramethyl-1,1'-biphenyl, 10 g (69 mmol) of 2-methyl-1*H*-inden-7-amine (**15**), 23.2 g (240 mmol) of sodium *tert*-butoxide and 1.2 g (2.0 mmol) Pd<sub>2</sub>(dba)<sub>3</sub> in 500 mL of toluene. After heating under argon at 100 °C for 24 h, the reaction mixture was poured into 1 L of water and extracted with toluene (2×250 ml). The extracts were combined and dried over anhydrous Na<sub>2</sub>SO<sub>4</sub>. The solvent was rotary evaporated. Purification of the residue by column chromatography (eluent: hexane/dichloromethane=10/1) afforded the required products as a white solid. Yield: 15.8 g (65%). <sup>1</sup>H NMR (400 MHz, CDCl<sub>3</sub>): δ 7.92 (s, 2H), 7.50 (m, 1H), 7.44 (m, 1H), 7.26 (m, 1H), 6.95 (s, 2H), 6.65 (m, 1H), 3.09 (s, 2H), 2.50 (s, 6H), 2.41 (s, 6H), 2.11 (s, 3H). <sup>13</sup>C NMR (100 MHz, CDCl<sub>3</sub>): δ 148.1, 146.9, 141.0, 139.6, 134.2, 133.1, 128.0, 127.7, 127.0, 123.7, 121.2, 120.4, 119.5, 110.4, 41.3, 20.7, 20.0, 16.6. HRMS (ESI) calc. for C<sub>26</sub>H<sub>25</sub>NNa<sup>+</sup>: 374.1879 [M + Na]<sup>+</sup>; found: 374.1887.

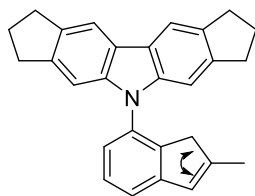

**5-(2-methyl-1*H*-inden-4/7-yl)-2,3,5,7,8,9-hexahydro-1*H*-dicyclopenta[*b,h*]carbazole (29).** A solution of 810 mg (4 mmol) of tri(*tert*-butyl)phosphane in 10 mL of toluene was added to a mixture of 29.1 g (69 mmol) 2,2'-dibromo-2,2',3,3'-tetrahydro-1*H*,1'*H*-5,5'-biindene, 10 g (69 mmol) of 2-methyl-1*H*-inden-7-amine (**15**), 23.2 g (240 mmol) of sodium *tert*-butoxide and 1.2 g (2.0 mmol) Pd<sub>2</sub>(dba)<sub>3</sub> in 500 mL of toluene. After heating under argon at 100 °C for 24 h, the reaction mixture was poured into 1 L of water and extracted with toluene (2×250 ml). The extracts were combined and dried over anhydrous Na<sub>2</sub>SO<sub>4</sub>. The solvent was rotary evaporated. Purification of the residue by column chromatography (eluent: hexane/dichloromethane=10/1) afforded the required products as a white solid. Yield: 16.1 g (63%) as a mixture of two isomers 1/1. <sup>1</sup>H NMR (400 MHz, CDCl<sub>3</sub>): δ 8.08 (s, 2H), 7.36–7.61 (m, 3H), 7.17 (s, 1H), 7.12 (s, 1H), 6.72 (m) and 6.26 (m) (sum 1H), 3.57 (s, 1H), 3.23 (m, 5H), 3.12 (t, *J* = 7.3 Hz, 4H), 2.30 (p, *J* = 7.2 Hz, 4H), 2.20 (s, 3H). <sup>13</sup>C NMR (100 MHz, CDCl<sub>3</sub>): δ 148.1, 147.0, 146.8, 145.4, 143.8, 142.1, 141.2, 141.0, 140.5, 135.5, 135.4, 133.1, 129.3, 128.0, 127.0, 125.8, 125.0, 124.6, 123.7, 122.7, 122.1, 119.5, 115.0, 114.9, 105.5, 105.3, 43.1, 41.3, 33.2, 32.4, 26.4, 16.7, 16.6. HRMS (ESI) calc. for C<sub>28</sub>H<sub>25</sub>NNa<sup>+</sup>: 398.1879 [M + Na]<sup>+</sup>; found: 398.1874.

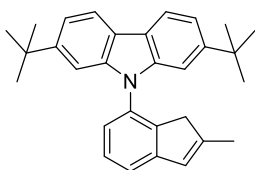

**2,7-Di-*tert*-butyl-9-(2-methyl-1*H*-inden-7-yl)-9*H*-carbazole (30).** A solution of 810 mg (4 mmol) of tri(*tert*-butyl)phosphane in 10 mL of toluene was added to a mixture of 29.3 g (69 mmol) 2,2'-dibromo-4,4'-di-*tert*-butyl-1,1'-biphenyl, 10 g (69 mmol) of 2-methyl-1*H*-inden-7-amine (**15**), 23.2 g (240 mmol) of sodium *tert*-butoxide and 1.2 g (2.0 mmol) Pd<sub>2</sub>(dba)<sub>3</sub> in 500 mL of toluene. After heating under argon at 100 °C for 24 h, the reaction mixture was poured into 1 L of water and extracted with toluene

(2×250 ml). The extracts were combined and dried over anhydrous Na<sub>2</sub>SO<sub>4</sub>. The solvent was rotary evaporated. Purification of the residue by column chromatography (eluent: hexane/dichloromethane=10/1) afforded the required products as a white solid. Yield: 16.3 g (58%). <sup>1</sup>H NMR (400 MHz, CDCl<sub>3</sub>): δ 8.17 (d, *J* = 8.2 Hz, 2H), 7.57 (dd, *J* = 13.6, 7.5 Hz, 2H), 7.45–7.48 (m, 3H), 7.39 (m, 2H), 6.26 (s, 1H), 3.57 (s, 2H), 2.19 (s, 3H), 1.50 (s, 18H). <sup>13</sup>C{<sup>1</sup>H} NMR (100 MHz, CDCl<sub>3</sub>): δ 148.8, 146.6, 145.6, 143.1, 141.4, 129.0, 125.4, 125.2, 124.7, 122.5, 120.9, 119.3, 117.4, 106.8, 43.1, 35.1, 31.8, 16.6. HRMS (ESI) calc. for C<sub>30</sub>H<sub>33</sub>NNa<sup>+</sup>: 430.2505 [M + Na]<sup>+</sup>; found: 430.2505.

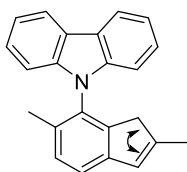

**9-(2,6-Dimethyl-1*H*-inden-4/7-yl)-9*H*-carbazole (31).** Solution of 1.26 g (6.2 mmol) tri(*tert*-butyl)phosphane and 1.78 g (3.1 mmol) Pd<sub>2</sub>(dba)<sub>3</sub> in 10 mL of toluene was added to solution of 32.5 g (104 mmol) 2,2'-dibromobiphenyl, 16.6 g (104 mmol) 2,5-dimethyl-1*H*-inden-7-amine (**19**) and 35.0 g (364 mmol) sodium *tert*-butylate in 800 mL of toluene. After heating under argon at 100 °C for 24 h the reaction mixture was poured into 1 L of water and extracted with toluene (2×300 ml). The extracts were combined and dried over anhydrous

Na<sub>2</sub>SO<sub>4</sub>. The solvent was rotary evaporated. Purification of the residue by column chromatography (eluent: hexane/dichloromethane=10/1) afforded the required products as a white solid. Yield: 25.7 g (80%) as a mixture of two isomers in ratio 2.3/1. Major isomer: <sup>1</sup>H NMR (400 MHz, CDCl<sub>3</sub>): δ 8.24 (d, *J* = 7.7 Hz, 2H), 7.41 (m, 2H), 7.30–7.36 (m, 4H), 7.10 (m, 2H), 6.62 (m, 1H), 2.97 (s, 2H), 2.08 (s, 3H), 2.06 (s, 3H). Minor isomer: <sup>1</sup>H NMR (400 MHz, CDCl<sub>3</sub>): δ 8.29 (m, 2H), 7.50 (m, 2H), 7.35–7.42 (m, 3H), 7.27 (m, 1H), 7.13 (m, 2H), 5.91 (m, 1H), 3.47 (s, 2H), 2.08 (s, 3H), 2.06 (s, 3H). <sup>13</sup>C{<sup>1</sup>H} NMR (major\*/minor°, 100 MHz, CDCl<sub>3</sub>): δ 147.7°, 145.9°, 145.5°, 145.2°, 142.53°, 142.47°, 141.0°, 140.2°, 134.9, 132.4, 131.1, 129.5, 127.1, 126.8, 126.3, 125.83, 125.80, 124.6, 123.4, 123.0, 122.9, 120.4\*, 120.2°, 120.0, 119.4\*, 119.3°, 110.0°, 109.7\*, 43.0°, 40.7\*, 17.3°, 17.1\*, 16.7°, 16.5\*. HRMS (ESI) calc. for C<sub>23</sub>H<sub>19</sub>NNa<sup>+</sup>: 332.1410 [M + Na]<sup>+</sup>; found: 332.1413.

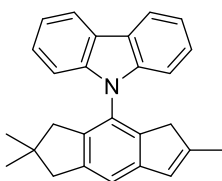

**9-(2,6,6-Trimethyl-1,2,3,5-tetrahydro-*s*-indacen-4/7-yl)-9*H*-carbazole (32).** Solution of 0.81 g (4.0 mmol) tri(*tert*-butyl)phosphane and 1.15 g (2.0 mmol) Pd<sub>2</sub>(dba)<sub>3</sub> in 10 mL of toluene was added to solution of 20.9 g (67 mmol) 2,2'-dibromobiphenyl, 14.3 g (67 mmol) 2,2,6-trimethyl-1,2,3,5-tetrahydro-*s*-indacen-4-amine (**20**) and 22.5 g (234 mmol) sodium *tert*-butylate in 500 mL of toluene. After heating under argon at 100 °C for 24 h, the reaction mixture was poured into 1 L of water and extracted with toluene (2×300

ml). The extracts were combined and dried over anhydrous Na<sub>2</sub>SO<sub>4</sub>. The solvent was rotary evaporated. Purification of the residue by column chromatography (eluent: hexane) afforded the required products as a white solid. Yield: 17.0 g (70%) as a mixture of two isomers with ratio 1/1. <sup>1</sup>H NMR (400 MHz, CDCl<sub>3</sub>): δ 8.31 (m, 2H), 7.52 (m, 2H), 7.37–7.46 (m, 3H), 7.25 (m, 1H), 7.21 (m, 1H), 6.65 (m) and 6.08 (m) (sum 1H), 3.50 (s) and 3.07 (s) (sum 2H), 3.00 (s) and 2.99 (s) (sum 2H), 2.53 (s, 2H), 2.13 (s, 3H), 1.25 (s) and 1.24 (s) (sum 6H). <sup>13</sup>C{<sup>1</sup>H} NMR (100 MHz, CDCl<sub>3</sub>): δ 146.4, 146.0, 145.7, 144.2, 143.7, 142.3, 141.0, 140.7, 140.0, 139.9, 139.4, 137.8, 128.7, 127.1, 125.72, 125.70, 124.7, 124.6, 123.03, 122.96, 120.4, 120.2, 119.32, 119.26, 116.8, 110.2, 109.9, 48.0, 47.9, 45.1, 44.9, 42.9, 40.60, 40.57, 28.57, 28.56, 16.7, 16.6. HRMS (ESI) calc. for C<sub>27</sub>H<sub>25</sub>NNa<sup>+</sup>: 386.1879 [M + Na]<sup>+</sup>; found: 386.1873.

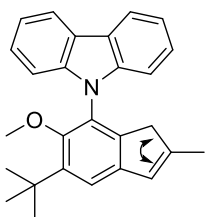

**9-(5-*Tert*-butyl-6-methoxy-2-methyl-1*H*-inden-7-yl)-9*H*-carbazole (33).** Solution of 715 mg (1.4 mmol) Pd(*t*Bu<sub>3</sub>P)<sub>2</sub> in 10 mL of toluene was added to solution of 13.9 g (44.6 mmol) 2,2'-dibromobiphenyl, 10.3 g (44.5 mmol) 5-*tert*-butyl-6-methoxy-2-methyl-1*H*-indene-4/7-amine (**22**) and 15.0 g (155.8 mmol) sodium *tert*-butylate in 250 mL of toluene. After heating under argon at 100 °C for 24 h, the reaction mixture was poured into 1 L of water and extracted with toluene (2×300 ml). The extracts were combined and dried over anhydrous Na<sub>2</sub>SO<sub>4</sub>. The solvent was rotary evaporated. Purification of the residue by column chromatography (eluent: hexane) afforded the required products as a white solid. Yield: 13.1 g (77%) as a mixture of two isomers in ratio 1/1. <sup>1</sup>H NMR (400 MHz, CDCl<sub>3</sub>): δ 8.18 (m, 2H), 7.50 (m) and 7.40 (m) (sum 1H), 7.43 (m, 2H), 7.31 (m, 2H), 7.14–7.19 (m, 2H), 6.50 (m) and 5.87 (m) (sum 1H), 3.38 (s) and 2.90 (m) (sum 2H), 2.99 (s) and 2.93 (s) (sum 3H), 2.02 (m) and 2.00 (m) (sum 3H), (1.50 (s) and 1.49 (s)(sum 9H). <sup>13</sup>C{<sup>1</sup>H} NMR (100 MHz, CDCl<sub>3</sub>): δ 155.4, 153.7, 147.6, 145.5, 143.5, 142.3, 141.7, 140.5, 140.4, 139.8, 138.9, 138.4, 126.8, 125.9, 125.6, 124.6, 123.3, 123.2, 121.3, 121.2, 120.2, 120.0, 119.7, 119.6, 117.9, 110.7, 110.6, 60.5, 60.2, 43.1, 41.3, 35.3, 35.2, 30.8, 30.7, 30.3, 16.8, 16.5. HRMS (ESI) calc. for C<sub>27</sub>H<sub>27</sub>NNaO<sup>+</sup>: 404.1985 [M + Na]<sup>+</sup>; found: 404.1989.

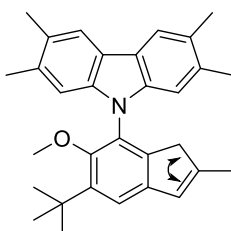

**9-(5-*Tert*-butyl-6-methoxy-2-methyl-1*H*-inden-7-yl)-2,3,6,7-tetramethyl-9*H*-carbazole (34).** Solution of 240 mg (1.20 mmol) tri(*tert*-butyl)phosphane and 0.54 g (0.60 mmol) Pd<sub>2</sub>(*dba*)<sub>3</sub> in 10 mL of toluene was added to solution of 7.18 g (19.5 mmol) 2,2'-dibromo-4,4',5,5'-tetramethyl-1,1'-biphenyl, 4.5 g (19.5 mmol) 5-*tert*-butyl-6-methoxy-2-methyl-1*H*-indene-4/7-amine (**22**) and 6.6 g (68.3 mmol) sodium *tert*-butylate in 150 mL of toluene. After heating under argon at 100 °C for 24 h, the reaction mixture was poured into 1 L of water and extracted with toluene (2×300 ml). The extracts were combined and dried over anhydrous Na<sub>2</sub>SO<sub>4</sub>. The solvent was rotary evaporated. Purification of the residue by column chromatography (eluent: hexane/dichloromethane=10/1) afforded the required products as a yellow solid. Yield: 5.9 g (69%) as a mixture of two isomers in ratio 3/2. Major isomer: <sup>1</sup>H NMR (400 MHz, CDCl<sub>3</sub>): δ 7.91 (s, 2H), 7.52 (s, 1H), 6.94 (s, 2H), 5.92 (m, 1H), 3.40 (s, 2H), 3.01 (s, 3H), 2.49 (s, 6H), 2.40 (s, 6H), 2.04 (s, 3H), 1.54 (s, 9H). Minor isomer: <sup>1</sup>H NMR (400 MHz, CDCl<sub>3</sub>): δ 7.91 (s, 2H), 7.43 (s, 1H), 6.92 (s, 2H), 6.53 (m, 1H), 3.07 (s, 3H), 2.94 (s, 2H), 2.49 (s, 6H), 2.40 (s, 12H), 2.04 (s, 3H), 1.54 (s, 9H). <sup>13</sup>C{<sup>1</sup>H} NMR (100 MHz, mixture of isomers, CDCl<sub>3</sub>): δ 155.6, 153.9, 147.3, 145.5, 143.8, 142.1, 141.4, 140.7, 139.4, 138.6, 138.2, 134.3, 134.2, 127.9, 127.8, 126.7, 126.1, 124.7, 121.7, 121.4, 121.3, 121.0, 120.3, 120.1, 117.6, 111.0, 110.9, 60.6, 60.4, 43.1, 41.3, 35.3, 35.1, 30.7, 30.6, 20.8, 20.1, 16.8, 16.6. HRMS (ESI) calc. for C<sub>31</sub>H<sub>35</sub>NNaO<sup>+</sup>: 460.2611 [M + Na]<sup>+</sup>; found: 460.2612.

## SYNTHESES OF BIS(INDENYL)DIMETHYLSILANE PROLIGANDS AND ZIRCONOCENES.

### General Method A for synthesis of bis(indenyl)dimethylsilane proligands.

To a solution of (50.0 mmol, 1 eq.) of indene in 500 mL (10 mL/mmol) of ether, 20.0 mL (50.0 mmol, 1 eq.) of 2.5 M <sup>*n*</sup>BuLi in hexanes was added in one portion at 0 °C. This mixture was stirred overnight at room temperature, then the resulting mixture was cooled to -50 °C, and 100 mL (1 mL/mmol) absolute THF and 450 mg (5.0 mmol, 0.1 eq.) of CuCN was added. The obtained mixture was stirred for 30 min at -25 °C, then 3.23 g (25.0 mmol, 0.5 eq.) of dimethyldichlorosilane was added in one portion. This mixture was stirred overnight at room temperature, then passed through a short pad of silica gel which was additionally washed by 2×25 mL of dichloromethane. The combined filtrate was evaporated under reduced pressure and the resulting crude product was purified by column chromatography on Silica Gel 60 (eluent: hexane/dichloromethane, 5:1, vol.).



### General Method B for synthesis of bis(indenyl)dimethylsilane prolignands.

To a solution of 50.0 mmol of indene in 500 mL of ether, 20.0 mL (50.0 mmol) of 2.5 M <sup>n</sup>BuLi in hexanes was added in one portion at 0 °C. This mixture was stirred overnight at room temperature, then the resulting mixture was cooled to -50 °C, and 41 mg (0.5 mmol) of N-methylimidazole was added, then 3.23 g (25.0 mmol) of dimethyldichlorosilane was added in one portion. This mixture was stirred overnight at room temperature, then passed through a short pad of silica gel which was additionally washed by 2×25 mL of dichloromethane. The combined filtrate was evaporated under reduced pressure and the resulting crude product was purified by column chromatography on Silica Gel 60 (eluent: hexane/dichloromethane, 5:1, vol.).

**General Method C for syntheses of *ansa*-zirconocenes.** To a cooled 0 °C solution of (21.6 mmol, 1 eq.) bis[indenyl]dimethylsilane in 250 mL (10 mL/mmol) of ether, 17.3 mL (43.3 mmol, 2 eq.) of 2.5 M <sup>n</sup>BuLi in hexanes was added in one portion. This mixture was stirred overnight at room temperature, then the resulting solution was cooled to -50 °C, and 8.16 g (21.6 mmol, 1 eq.) of ZrCl<sub>4</sub>(THF)<sub>2</sub> was added. The reaction mixture was stirred for 24 h at room temperature. The volatiles were evaporated to dryness. The residue was treated with 350 mL of hot toluene, and the formed suspension was filtered while hot through a short pad of Celite to get rid of LiCl. The resulting solution was concentrated in vacuum and the residue was recrystallized from toluene or toluene/hexane mixture.

### General Method D for synthesis of *rac*-isomers of dimethylated zirconocenes.

To a suspension of pure *rac*-zirconocene or mixture of *rac*- and *meso*-isomers of zirconocene dichloride (1.2 mmol) in 50 mL of toluene, 4.1 mL of 2.9 M MeMgBr (12.0 mmol) in ether was added at room temperature. This mixture was stirred for 24 h at 100 °C, then volatiles were evaporated to dryness in vacuum. To the residue, 100 mL of toluene were added and the mixture was heated up to 100 °C and then passed through a short pad of Celite to get rid of magnesium salts and the excess of MeMgBr. The filtrate was concentrated in vacuum and the residue was recrystallized from toluene or toluene/hexane mixture giving pure *rac*-isomer of dimethyl zirconium complex.

### General Method E for synthesis of *rac*-isomers of dimethylated zirconocenes.

To a suspension of pure *rac*-zirconocene or mixture of *rac*- and *meso*-isomers of zirconocene dichloride (1.2 mmol) in 50 mL of toluene, 4.1 mL of 2.9 M MeMgBr (12.0 mmol) in ether was added at room temperature. This mixture was stirred for 24 h at 100 °C, then volatiles were evaporated to dryness in vacuum. To the residue 100 mL of toluene were added and the mixture was heated up to 100 °C and then passed through a short pad of Celite to get rid of magnesium salts and the excess of MeMgBr. The filtrate was concentrated in vacuum. To the residue, 50 mL of absolute THF and 4.2 mg of LiCl (0.1 mmol) were added. The reaction mixture was stirred at 50 °C for 16 h and then 10 mL of toluene was added. The volatiles were evaporated to dryness in vacuum. After that, 50 mL of toluene was added and the mixture was filtered through the short pad of Celite to get rid of LiCl. The filtrate was concentrated in vacuum and the residue was recrystallized from toluene or toluene/hexane mixture giving pure *rac*-isomer of dimethyl zirconium complex.

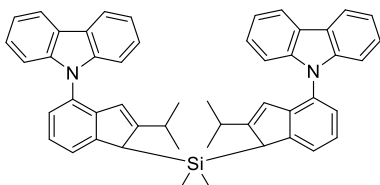

### Bis[2-isopropyl-4-(9H-carbazolyl)-1H-inden-1-yl]dimethylsilane (L1).

General procedure A was applied using 16.17 g (50.0 mmol) of 9-(2-isopropyl-1H-inden-7-yl)-9H-carbazole (**10**). Yield: 15.2 g (86%) of bis[2-isopropyl-4-(9H-carbazolyl)-1H-indene-1-yl]dimethylsilane (**L1**) (ca. 80% purity by NMR, approx. 80:20 mixture of *rac*- and *meso*-isomers) as yellowish glassy solid which was further used without an additional purification. <sup>1</sup>H NMR (400 MHz, CDCl<sub>3</sub>): δ 8.35 (d, *J* = 7.6 Hz, 4H), 7.90 (d, *J* = 7.1 Hz) and 7.62–7.32 (m), (sum 18H), 6.44 (s, 2H), 4.36 (s) and 4.27 (s), (sum 2H), 2.99 (s) and 2.85 (s), (sum 2H), 1.36–1.19 (m, 12H), 0.11 (s) and 0.02 (s) and -0.04 (s), (sum 6H). <sup>13</sup>C{<sup>1</sup>H} NMR (100 MHz, CDCl<sub>3</sub>), *rac*-isomer: δ 160.4, 146.8, 142.7, 141.3, 129.5, 125.8 (two resonances), 124.7, 124.1, 123.2, 122.7, 120.7, 120.2 (two resonances), 119.63, 119.56,

110.3, 110.1, 45.9, 29.7, 24.6, 21.2, -5.6. HRMS (ESI) calc. for  $C_{50}H_{46}N_2NaSi^+$ : 725.3322  $[M + Na]^+$ ; found: 725.3319.

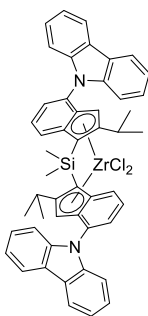

**Rac- and meso-dimethylsilanediylbis[ $\eta^5$ -2-isopropyl-4-(9H-carbazolyl)-indene-1-yl]zirconium dichloride (C1).** General Method C was applied using 15.2 g (21.6 mmol) of bis[2-isopropyl-4-(9H-carbazolyl)-1H-indene-1-yl]dimethylsilane (L1). A total of 12.8 g (68.7%) of *rac*- and *meso*-dimethylsilanediylbis[ $\eta^5$ -2-isopropyl-4-(9H-carbazolyl)-indene-1-yl]zirconium dichloride were isolated by fractional crystallization from toluene, including 4.4 g (21%) of pure *rac*-C1 $\times$ 1-PhMe and 1.3 g (7%) of pure *meso*-C1. **Rac-C1:** Anal. calc. for  $C_{50}H_{44}Cl_2N_2SiZr\cdot C_7H_8$ : C, 71.67; H, 5.49; N, 2.93. Found: C, 71.35; H, 5.32; N, 3.08.  $^1H$  NMR (400 MHz,  $CD_2Cl_2$ ):  $\delta$  8.15 (d,  $J = 7.6$  Hz, 2H), 8.11 (d,  $J = 7.6$  Hz, 2H), 7.98 (d,  $J = 8.1$  Hz, 2H), 7.78 (d,  $J = 8.8$  Hz, 2H), 7.57 (d,  $J = 7.3$  Hz, 2H), 7.36–7.12 (m, 10H), 6.81 (d,  $J = 7.3$  Hz, 2H), 6.63 (s, 2H), 3.31 (m, 2H), 1.46 (s, 6H), 1.28 (d,  $J = 6.8$  Hz, 6H), 1.08 (d,  $J = 6.6$  Hz, 6H).  $^{13}C\{^1H\}$  NMR (100 MHz,  $CD_2Cl_2$ ):  $\delta$  150.8, 141.3, 141.0, 135.5, 131.6, 128.9, 126.7, 126.6, 126.3, 125.9, 125.1, 124.5, 124.2, 120.8 (two resonances), 120.5, 120.4, 114.3, 113.0, 111.3, 84.0, 31.3, 30.0, 20.3, 4.0. **Meso-C1:** Anal. calc. for  $C_{50}H_{44}Cl_2N_2SiZr$ : C, 69.58; H, 5.14; N, 3.25. Found: C, 69.32; H, 5.17; N, 3.29.  $^1H$  NMR (400 MHz,  $CD_2Cl_2$ ):  $\delta$  8.14 (d,  $J = 7.6$  Hz, 2H), 8.12 (d,  $J = 7.6$  Hz, 2H), 8.00 (d,  $J = 8.3$  Hz, 2H), 7.97 (d,  $J = 8.6$  Hz, 2H), 7.49 (d,  $J = 8.6$  Hz, 2H), 7.38 (t,  $J = 7.6$  Hz, 2H), 7.33–7.23 (m, 6H), 7.11 (dd,  $J = 8.6$  Hz, 7.6 Hz, 2H), 6.80 (d,  $J = 7.8$  Hz, 2H), 6.61 (s, 2H), 3.14 (sept,  $J = 6.6$  Hz, 2H), 1.61 (s, 3H), 1.35 (s, 3H), 1.25 (d,  $J = 6.6$  Hz, 6H), 1.20 (d,  $J = 6.6$  Hz, 6H).  $^{13}C\{^1H\}$  NMR (100 MHz,  $CD_2Cl_2$ ):  $\delta$  150.3, 141.4, 141.1, 134.6, 133.2, 131.1, 126.7, 126.6, 126.2, 125.9, 125.8, 124.5, 124.1, 120.8, 120.7, 120.5, 120.4, 114.9, 113.1, 111.1, 86.0, 31.2, 30.1, 20.4, 4.6, 3.5.

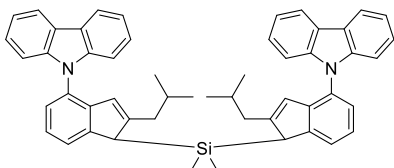

**Bis[2-isobutyl-4-(9H-carbazolyl)-1H-indene-1-yl]dimethylsilane (L2).** General procedure A was applied using 16.87 g (50.0 mmol) of 9-(2-isobutyl-1H-inden-7-yl)-9H-carbazole (12). Yield: 15.7 g (86%) of bis[2-isobutyl-4-(9H-carbazolyl)-1H-indene-1-yl]dimethylsilane (ca. 80% purity by NMR, approx. 65:35 mixture of *rac*- and *meso*-isomers) as yellowish glassy solid which was further used without an additional purification.  $^1H$  NMR (400 MHz,  $CDCl_3$ ):  $\delta$  8.28 (d,  $J = 7.7$  Hz, 4H), 7.84–7.20 (m, 18H), 6.33 (s, 2H), 4.12 (s) and 4.10 (s) (sum 2H), 2.64–2.30 (m, 4H), 2.10–1.76 (m, 2H), 1.01 (d,  $J = 6.6$  Hz) and 0.95 (d,  $J = 6.6$  Hz) and 0.91 (d,  $J = 6.6$  Hz) and 0.87 (d,  $J = 6.6$  Hz), (sum 12H), -0.01 (s) and -0.05 (s) and -0.14 (s), (sum 6H).  $^{13}C\{^1H\}$  NMR (100 MHz,  $CDCl_3$ ):  $\delta$  152.8, 152.7, 147.1, 147.0, 142.7, 142.6, 141.32, 141.26, 129.33, 129.28, 125.9, 124.7, 124.4, 124.11, 124.06, 123.3, 122.8, 122.7, 120.4, 120.3, 119.72, 119.65, 110.4, 110.3, 46.8 (two resonances), 41.4, 41.2, 28.9, 28.7, 23.2, 23.1, 22.2, -4.3, -5.5, -6.0. HRMS (ESI) calc. for  $C_{52}H_{50}N_2NaSi^+$ : 753.3635  $[M + Na]^+$ ; found: 753.3630.

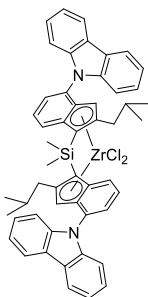

**Rac- and meso-dimethylsilanediylbis[ $\eta^5$ -2-isobutyl-4-(9H-carbazolyl)-indene-1-yl]zirconium dichloride (C2).** General Method C was applied using 15.5 g (21.2 mmol) of bis[2-isobutyl-4-(9H-carbazolyl)-1H-indene-1-yl]dimethylsilane (L2). A total of 14.3 g (76%) of *rac*- and *meso*-dimethylsilanediylbis[ $\eta^5$ -2-isobutyl-4-(9H-carbazolyl)-indene-1-yl]zirconium dichloride was isolated by fractional crystallization of the filtrate, including 1.29 g (7%) of pure *rac*-C2 $\times$ 1-PhMe and 100 mg (0.5%) of pure *meso*-C2. **Meso-C2:** Anal. calc. for  $C_{52}H_{48}Cl_2N_2SiZr$ : C, 70.08; H, 5.43; N, 3.14. Found: C, 70.26; H, 5.30; N, 3.26.  $^1H$  NMR (400 MHz,  $CDCl_3$ ):  $\delta$  8.12–8.08 (m, 2H), 8.07 (d,  $J = 7.8$  Hz, 2H), 8.01 (d,  $J = 8.3$  Hz, 2H), 7.96 (d,  $J = 8.7$  Hz, 2H), 7.51 (d,  $J = 7.2$  Hz, 2H), 7.36 (dd,  $J = 7.2$  Hz, 1.2 Hz, 2H), 7.27–7.17 (m, 6H), 7.11 (dd,  $J = 8.7$  Hz, 7.3 Hz, 2H), 6.82–6.75 (m, 2H), 6.49 (s, 2H), 2.66 (dd,  $J = 13.6$  Hz, 6.0 Hz, 2H), 2.45 (dd,  $J = 13.6$  Hz, 8.5 Hz, 2H), 1.78 (m, 2H), 1.60 (s, 3H), 1.25 (s, 3H), 0.95 (d,  $J = 6.7$  Hz, 6H), 0.87 (d,  $J = 6.5$  Hz, 6H). **Rac-C2:** Anal. calc. for  $C_{52}H_{48}Cl_2N_2SiZr\cdot C_7H_8$ : C, 72.07; H, 5.74; N, 2.85. Found: C, 72.00; H, 5.51; N, 2.89.  $^1H$  NMR (400 MHz,  $CDCl_3$ ):  $\delta$  8.13–8.08 (m, 2H), 8.05 (d,  $J = 7.4$  Hz, 2H), 7.90 (d,  $J = 8.1$  Hz, 2H), 7.79 (d,  $J = 8.7$  Hz, 2H), 7.57 (d,  $J = 7.1$  Hz, 2H), 7.30–7.13 (m, 10H), 6.86–6.79 (m, 2H), 6.63 (s, 2H), 2.79 (dd,  $J = 13.8$  Hz, 6.2 Hz, 2H), 2.17 (dd,  $J = 13.8$  Hz, 8.3 Hz, 2H), 1.78 (m, 2H), 1.40 (s, 6H), 0.98 (d,  $J = 6.7$  Hz, 6H), 0.88 (d,  $J = 6.5$  Hz, 6H).  $^{13}C\{^1H\}$  NMR (100 MHz,  $CDCl_3$ ):  $\delta$  141.0, 140.7,

140.2, 134.6, 131.6, 128.4, 126.1, 125.9, 125.8, 125.0, 124.9, 124.0, 123.7, 120.3, 120.2, 120.0, 119.9 (two resonances), 112.2, 110.9, 84.0, 41.8, 32.6, 22.7, 22.1, 3.5.

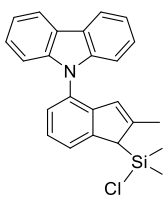

**9-(1-(Chlorodimethylsilyl)-2-methyl-1H-inden-4-yl)-9H-carbazole.** To a solution of 5.0 g (16.9 mmol) of 9-(2-methyl-1H-inden-4/7-yl)-9H-carbazole in 170 mL of ether, 6.8 mL (16.9 mmol) of 2.5 M <sup>n</sup>BuLi in hexanes was added in one portion at room temperature. This mixture was stirred overnight at room temperature, then the resulting mixture was cooled to -50 °C, and 6.2 mL (50.7 mmol) of dimethyldichlorosilane was added in one portion. This mixture was stirred overnight at room temperature, then volatiles were evaporated under reduced pressure. The residue was treated with 100 mL of dry hexane and filtered through a glass frit. The filtrate was then concentrated in vacuum. The product was used without any additional purification. Yield: 6.1 g (92%). <sup>1</sup>H NMR (400 MHz, CDCl<sub>3</sub>): δ 8.20 (d, *J* = 7.9 Hz, 2H), 7.63 (d, *J* = 7.3 Hz, 1H), 7.38–7.43 (m, 3H), 7.26–7.35 (m, 4H), 7.09 (d, *J* = 8.2 Hz, 1H), 6.17 (m, 1H), 3.77 (s, 1H), 2.19 (s, 3H), 0.48 (s, 3H), 0.32 (s, 3H). <sup>13</sup>C{<sup>1</sup>H} NMR (100 MHz, CD<sub>2</sub>Cl<sub>2</sub>): δ 147.3, 144.9, 142.8, 141.21, 141.16, 128.8, 125.81, 125.75, 125.1, 125.0, 124.2, 123.2, 123.1, 120.3, 120.2, 119.6, 119.5, 110.1, 110.0, 50.8, 17.6, 0.8, -0.2.

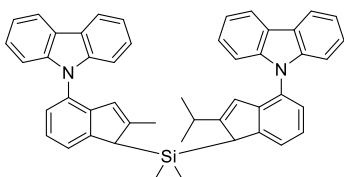

**9-(1-((4-(9H-Carbazol-9-yl)-2-isopropyl-1H-inden-1-yl)dimethylsilyl)-2-methyl-1H-inden-4-yl)-9H-carbazole (L3).** To a solution of 5.0 g (15.5 mmol) of 9-(2-isopropyl-1H-inden-7-yl)-9H-carbazole (**10**) in 150 mL of ether, 6.2 mL (15.5 mmol) of 2.5 M <sup>n</sup>BuLi in hexanes was added in one portion at room temperature. This mixture was stirred overnight at room temperature then the resulting mixture was cooled to -50 °C and 16 mg (0.2 mmol) of N-methylimidazole was added. Next, a solution of 6.0 g (15.5 mmol) of 9-(1-(chlorodimethylsilyl)-2-methyl-1H-inden-4-yl)-9H-carbazole in 10 mL THF was added in one portion. This mixture was stirred overnight at room temperature, and then passed through a short pad of silica gel which was additionally washed by 2×25 mL of dichloromethane. The combined filtrate was evaporated under reduced pressure and the resulting crude product was purified by column chromatography on Silica Gel 60 (eluent: hexane/dichloromethane, 5:1, vol.). Yield: 3.7 g (71%) as a mixture of several isomers. <sup>1</sup>H NMR (400 MHz, CDCl<sub>3</sub>): δ 8.20–8.25 (m, 4H), 7.75 (m, 1H), 7.37–7.46 (m, 8H), 7.30–7.36 (m, 7H), 7.19 (m, 2H), 6.28 (s) and 6.23 (s), (sum 2H), 4.23 (s) and 4.15 (s) and 4.02 (s) and 3.99 (s), (sum 2H), 2.78 (m, 1H), 2.29 (s) and 2.17 (s), (sum 3H), 1.12–1.19 (m, 6H), -0.05 (s) and -0.11 (s) and -0.12 (m), (sum 6H). <sup>13</sup>C{<sup>1</sup>H} NMR (100 MHz, CDCl<sub>3</sub>): δ 160.2, 160.1, 148.5, 148.3, 147.02, 146.95, 146.7, 146.6, 142.9, 142.7, 142.6, 142.5, 141.3, 141.20, 141.18, 141.16, 129.3, 129.0, 128.9, 125.81, 125.77, 125.7, 124.6, 124.0, 123.19, 123.17, 123.1, 120.3, 120.2, 119.61, 119.56, 119.5, 110.2, 110.11, 110.06, 48.0, 47.8, 46.0, 45.8, 29.6, 24.6, 24.5, 21.2, 18.0, 17.8, -5.3, -5.8, -5.9. HRMS (ESI) calc. for C<sub>48</sub>H<sub>42</sub>N<sub>2</sub>NaSi<sup>+</sup>: 697.3009 [M + Na]<sup>+</sup>; found: 697.3008.

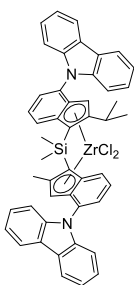

**Anti- and Syn-dimethylsilanediyli[η<sup>5</sup>-2-isopropyl-4-(9H-carbazoly)]-indene-1-yl][η<sup>5</sup>-2-methyl-4-(9H-carbazoly)]-indene-1-yl]zirconium dichloride (C3).** General Method C was applied using 3.7 g (5.5 mmol) of 9-(1-((4-(9H-carbazol-9-yl)-2-isopropyl-1H-inden-1-yl)dimethylsilyl)-2-methyl-1H-inden-4-yl)-9H-carbazole (**L3**). Recrystallizations from toluene gave three crops of crystals: 150 mg (3%) *anti/syn* = 6/94, 400 mg (9%) *anti/syn* = 1.0/2.3 and 320 mg (7%) *anti/syn* = 92/8. Recrystallization of the last crop from toluene/hexane mixture gave 150 mg (3%) of pure *anti*-isomer. **Syn-C3:** <sup>1</sup>H NMR (400 MHz, CD<sub>2</sub>Cl<sub>2</sub>): δ 8.12 (m, 4H), 7.98 (m, 4H), 7.50 (m, 2H), 7.37 (m, 2H), 7.23–7.31 (m, 6H), 7.10–7.14 (m, 2H), 6.81 (m, 2H), 6.57 (s, 1H), 6.51 (s, 1H), 3.17 (m, 1H), 2.32 (s, 3H), 1.60 (s, 3H), 1.32 (s, 3H), 1.24 (d, *J* = 6.6 Hz, 6H). <sup>13</sup>C{<sup>1</sup>H} NMR (100 MHz, CD<sub>2</sub>Cl<sub>2</sub>): δ 150.8, 141.1, 141.03, 141.00, 140.9, 136.9, 134.2, 133.8, 133.7, 133.6, 130.7, 129.9, 126.67, 126.66, 126.37, 126.36, 126.3, 125.9, 125.8, 125.7, 125.3, 125.2, 124.4, 124.3, 124.04, 124.00, 123.5, 120.9, 120.59, 120.57, 120.55, 120.4, 120.3, 120.2, 113.4, 113.0, 112.9, 111.02, 110.98, 86.4, 85.3, 31.2, 29.9, 20.2, 18.8, 3.5, 3.0. **Anti-C3:** Anal. calc. for C<sub>48</sub>H<sub>40</sub>Cl<sub>2</sub>N<sub>2</sub>SiZr: C, 69.04; H, 4.83; N, 3.35. Found: C, 68.97; H, 5.01; N, 3.34. <sup>1</sup>H NMR (400 MHz, CD<sub>2</sub>Cl<sub>2</sub>): δ 8.13 (m, 2H), 8.10 (m, 2H), 8.00 (d, *J* = 8.1 Hz, 1H), 7.85 (m, 2H), 7.78 (d, *J* = 8.6 Hz, 1H), 7.57 (m, 2H), 7.20–7.31 (m, 10H), 6.83 (d, *J* = 7.9 Hz, 1H), 6.78 (d, *J* = 8.1 Hz, 1H), 6.62 (s, 1H), 6.57 (s, 1H), 3.38 (m, 1H), 2.35 (s, 3H), 1.43 (s, 3H), 1.42 (s, 3H), 1.24 (d, *J* = 6.7 Hz, 3H), 1.00 (d, *J* = 6.5 Hz, 3H). <sup>13</sup>C{<sup>1</sup>H} NMR (100

MHz, CD<sub>2</sub>Cl<sub>2</sub>):  $\delta$  150.1, 141.4, 141.02, 140.97, 140.8, 137.7, 135.2, 134.7, 132.5, 130.7, 130.2, 127.4, 126.71, 126.65, 126.5, 126.3, 126.2, 126.1, 126.0, 125.80, 125.78, 124.6, 124.32, 124.26, 124.16, 123.9, 120.60, 120.55, 120.49, 120.33, 120.29, 120.23, 120.16, 115.1, 112.9, 112.5, 111.3, 110.9, 85.7, 84.1, 31.1, 29.7, 19.9, 19.4, 3.4, 3.0.

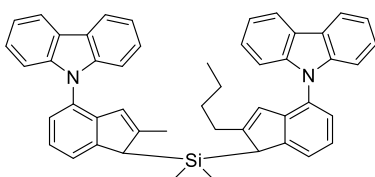

**9-(1-((4-(9H-Carbazol-9-yl)-2-butyl-1H-inden-1-yl)dimethylsilyl)-2-methyl-1H-inden-4-yl)-9H-carbazole (L4).** To a solution of 5.2 g (15.5 mmol) of 9-(2-butyl-1H-inden-7-yl)-9H-carbazole (**11**) in 150 mL of ether, 6.2 mL (15.5 mmol) of 2.5 M <sup>n</sup>BuLi in hexanes was added in one portion at room temperature. This mixture was stirred overnight at room temperature then the resulting mixture was cooled to -50 °C and 16 mg (0.2

mmol) of N-methylimidazole was added. Next, a solution of 6.0 g (15.5 mmol) of 9-(1-(chlorodimethylsilyl)-2-methyl-1H-inden-4-yl)-9H-carbazole in 10 mL THF was added in one portion. This mixture was stirred overnight at room temperature, then passed through a short pad of silica gel which was additionally washed by 2x25 mL of dichloromethane. The combined filtrate was evaporated under reduced pressure and the resulting crude product was purified by column chromatography on Silica Gel 60 (eluent: hexane/dichloromethane, 5:1, vol.). Yield: 4.9 g (92%) as a mixture of several isomers (ca. 96% purity by NMR). <sup>1</sup>H NMR (400 MHz, CDCl<sub>3</sub>):  $\delta$  8.20–8.24 (m, 4H), 7.68–7.73 (m, 1H), 7.11–7.47 (m, 17H), 6.28 (s) and 6.24 (s) (sum 2H), 4.12 (s) and 4.10 (s) and 4.02 (s) and 3.99 (s) (sum 2H), 2.18–2.61 (m, 4H), 2.18 (s) and 2.13 (s) (sum 3H), 1.44–1.60 (m, 2H), 0.84–0.94 (m, 3H), -0.05 (s) and -0.10 (m) and -0.11 (s) (sum 6H). <sup>13</sup>C{<sup>1</sup>H} NMR (100 MHz, CDCl<sub>3</sub>):  $\delta$  153.72, 153.70, 148.5, 148.4, 147.01, 146.95, 146.71, 146.66, 142.9, 142.8, 142.71, 142.65, 141.3, 141.22, 141.17, 129.14, 129.11, 129.0, 128.9, 125.81, 125.78, 125.74, 124.65, 124.03, 123.99, 123.94, 123.18, 123.15, 123.1, 122.7, 120.3, 120.2, 119.6, 119.5, 110.2, 110.12, 110.08, 48.0, 47.9, 46.83, 46.76, 31.5, 31.43, 31.36, 31.29, 22.49, 22.45, 18.0, 17.9, 13.86, 13.84, 13.82, 13.76, -5.5, -5.96, -5.99. HRMS (ESI) calc. for C<sub>49</sub>H<sub>44</sub>N<sub>2</sub>NaSi<sup>+</sup>: 711.3166 [M + Na]<sup>+</sup>; found: 711.3161.

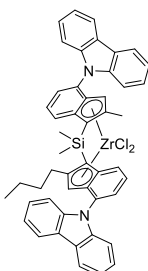

**Anti- and syn-dimethylsilanediyl[ $\eta^5$ -2-butyl-4-(9H-carbazolyl)-indene-1-yl][ $\eta^5$ -2-methyl-4-(9H-carbazolyl)-indene-1-yl]zirconium dichloride (C4).** General Method C was applied using 4.9 g (7.0 mmol) of 9-(1-((4-(9H-carbazol-9-yl)-2-butyl-1H-inden-1-yl)dimethylsilyl)-2-methyl-1H-inden-4-yl)-9H-carbazole (**L4**). Recrystallizations from toluene gave three crops of crystals: 1.85 g (31%) *anti/syn* = 1/7, 680 mg (11%) *anti/syn* = 3/1 and 110 mg (2%) of pure *anti*-isomer. Recrystallization of the first crop from toluene gave 655 mg (11%) of pure *syn*-isomer. **Syn-C4:** Anal. calc. for C<sub>49</sub>H<sub>42</sub>Cl<sub>2</sub>N<sub>2</sub>SiZr: C, 69.31; H, 4.99; N, 3.30. Found: C, 69.11; H, 5.10; N, 3.19. <sup>1</sup>H NMR (400 MHz, CD<sub>2</sub>Cl<sub>2</sub>):  $\delta$  8.12 (m, 4H), 8.01 (m, 3H), 7.96 (d, *J* = 8.8 Hz, 1H), 7.51 (m, 2H), 7.37 (m, 2H), 7.24–7.30 (m, 6H), 7.14 (m, 2H), 6.83 (m, 2H), 6.51 (s, 1H), 6.46 (s, 1H), 2.81 (m, 1H), 2.67 (m, 1H), 2.39 (s, 3H), 1.59 (s, 3H), 1.57 (m, 2H), 1.34 (m, 2H), 1.29 (s, 3H), 0.92 (t, *J* = 7.4 Hz, 3H). <sup>13</sup>C{<sup>1</sup>H} NMR (100 MHz, CD<sub>2</sub>Cl<sub>2</sub>):  $\delta$  144.7, 141.01, 140.96, 140.9, 140.7, 138.7, 134.38, 134.36, 133.8, 133.6, 129.9, 129.6, 126.8, 126.7, 126.3, 126.2, 126.1, 125.8, 125.75, 125.68, 125.1, 125.0, 124.31, 124.27, 124.1, 124.0, 120.60, 120.58, 120.55, 120.53, 120.40, 120.34, 120.28, 120.23, 119.8, 118.3, 113.0, 112.8, 111.3, 111.0, 86.3, 85.8, 36.2, 33.5, 22.7, 19.4, 14.1, 3.1, 2.9. **Anti-C4:** Anal. calc. for C<sub>49</sub>H<sub>42</sub>Cl<sub>2</sub>N<sub>2</sub>SiZr: C, 69.31; H, 4.99; N, 3.30. Found: C, 69.42; H, 5.07; N, 3.31. <sup>1</sup>H NMR (400 MHz, CD<sub>2</sub>Cl<sub>2</sub>):  $\delta$  8.09–8.14 (m, 4H), 7.93 (m, 2H), 7.86 (d, *J* = 8.6 Hz, 1H), 7.81 (d, *J* = 8.7 Hz, 1H), 7.58 (m, 2H), 7.23–7.30 (m, 10H), 6.83 (m, 2H), 6.62 (s, 1H), 6.56 (s, 1H), 2.90 (m, 1H), 2.39 (m, 1H), 2.34 (s, 3H), 1.56 (m, 2H), 1.43 (s, 3H), 1.41 (s, 3H), 1.36 (m, 2H), 0.95 (t, *J* = 7.2 Hz, 3H). <sup>13</sup>C{<sup>1</sup>H} NMR (100 MHz, CD<sub>2</sub>Cl<sub>2</sub>):  $\delta$  142.6, 141.2, 141.1, 140.0, 140.8, 136.8, 134.7, 134.5, 132.1, 132.0, 129.4, 129.0, 128.6, 126.8, 126.5, 126.4, 126.3, 126.2, 125.8, 125.72, 125.71, 125.68, 124.3, 124.2, 124.02, 123.96, 121.2, 120.57, 120.55, 120.5, 120.4, 120.3, 120.24, 120.20, 119.7, 112.7, 112.6, 111.2, 111.0, 85.2, 84.9, 35.7, 33.0, 22.6, 19.1, 14.2, 3.0, 2.8.

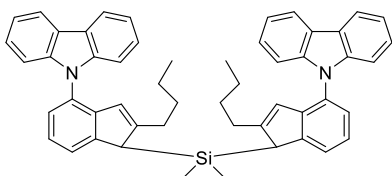

**Bis[2-butyl-4-(9H-carbazolyl)-1H-inden-1-yl]dimethylsilane (L5).**

General procedure B was applied using 5.0 g (14.8 mmol) of 9-(2-butyl-1H-inden-7-yl)-9H-carbazole (**11**). Yield: 4.0 g (74%) as a mixture of two isomers with ratio *rac*\*/*meso*° = 2/1 (ca. 92% purity by NMR). <sup>1</sup>H NMR (400 MHz, CDCl<sub>3</sub>): δ 8.25 (m, 4H), 7.73\* (d, *J* = 7.3 Hz) and 7.60\* (d, *J* = 7.5 Hz) (2H), 7.37–7.47 (m, 8H), 7.32–7.36 (m, 6H), 7.20 (m, 2H), 6.28 (m, 2H),

4.10\* (s) and 4.07 (s) (sum 2H), 2.41–2.64 (m, 4H), 1.45–1.58 (m, 4H), 1.25–1.38 (m, 4H), 0.84–0.92 (m, 6H), -0.06 (s) and -0.11 (s) and -0.16 (s) (sum 6H). <sup>13</sup>C NMR{<sup>1</sup>H} (100 MHz, CDCl<sub>3</sub>): δ 153.9\*, 153.8°, 146.8°, 146.8\*, 142.8\*, 142.7°, 141.3, 141.2, 129.2\*, 129.1°, 125.79, 125.76, 124.7\*, 124.7°, 124.0\*, 123.9°, 123.2, 123.1, 122.7, 120.3, 120.2, 119.6, 119.5, 110.3, 110.1, 46.8, 31.6°, 31.50\*, 31.47°, 31.4\*, 22.6°, 22.5\*, 13.9°, 13.8\*, -5.2°, -5.8\*, -6.1°. HRMS (ESI) calc. for C<sub>52</sub>H<sub>50</sub>N<sub>2</sub>NaSi<sup>+</sup>: 753.3635 [M + Na]<sup>+</sup>; found: 753.3633.

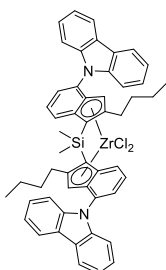

**Rac- and meso-dimethylsilanediylbis[η<sup>5</sup>-2-butyl-4-(9H-carbazolyl)-indene-1-yl]zirconium dichloride (C5).**

General Method C was applied using 3.8 g (5.2 mmol) of bis[2-butyl-4-(9H-carbazolyl)-1H-indene-1-yl]dimethylsilane (**L5**). Recrystallizations from toluene gave several crops of *rac*/*meso* mixtures: 400 mg *rac*/*meso* = 1/16, 300 mg *rac*/*meso* = 1.7/1.0, 1.7 g *rac*/*meso* = 1.5/1.0, 150 mg *rac*/*meso* = 1.0/4.9. The overall yield: 2.55 g (55%). After another series of recrystallization of these crops, 320 mg (7%) of pure *meso*-**C5** was isolated. **Rac-C5**: <sup>1</sup>H NMR (400 MHz, CDCl<sub>3</sub>): δ 8.06–8.12 (m, 4H), 7.92 (m, 2H), 7.57 (d, *J* = 7.2 Hz, 2H), 7.17–7.31 (m, 12H), 6.79–6.84 (m, 2H), 6.65 (s, 2H), 2.83–2.90 (m, 2H), 2.38–2.44 (m, 2H), 1.54 (m, 4H), 1.40 (s, 6H), 1.32 (m, 4H), 0.93 (t, *J* = 9.2 Hz, 6H). **Meso-C5**: Anal. calc. for C<sub>52</sub>H<sub>48</sub>Cl<sub>2</sub>N<sub>2</sub>SiZr:

C, 70.08; H, 5.43; N, 3.14. Found: C, 70.10; H, 5.56; N, 3.08. <sup>1</sup>H NMR (400 MHz, CDCl<sub>3</sub>): δ 8.06–8.11 (m, 4H), 8.00 (d, *J* = 8.2 Hz, 2H), 7.94 (d, *J* = 8.7 Hz, 2H), 7.50 (d, *J* = 7.2 Hz, 2H), 7.35 (m, 2H), 7.21–7.26 (m, 6H), 7.11 (d, *J* = 7.3 Hz, 1H), 7.09 (d, *J* = 7.3 Hz, 1H), 6.77–6.81 (m, 2H), 6.51 (s, 2H), 2.71–2.78 (m, 2H), 2.60–2.67 (m, 2H), 1.59 (s, 3H), 1.54 (m, 4H), 1.31 (m, 4H), 1.26 (s, 3H), 0.89 (t, *J* = 7.3 Hz, 6H). <sup>13</sup>C{<sup>1</sup>H} NMR (100 MHz, CDCl<sub>3</sub>): δ 143.8, 140.5, 140.2, 133.8, 133.5, 129.0, 126.00, 125.96, 125.3, 125.0, 124.6, 124.0, 123.6, 120.2, 120.1, 119.9, 119.8, 118.0, 112.6, 110.8, 84.7, 35.6, 33.0, 22.2, 13.9, 3.2, 2.9.

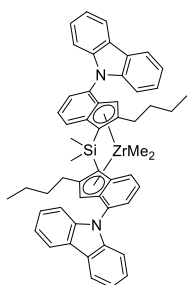

**Rac-dimethylsilanediylbis[η<sup>5</sup>-2-butyl-4-(9H-carbazolyl)-indene-1-yl]dimethylzirconium (M5).**

General method D was applied using two crops of crystals of **C5** 300 mg of *rac*/*meso* = 1.7/1.0 and 1.7 g of *rac*/*meso* = 1.5/1.0. Right after methylation, a mixture of isomers *rac*/*meso* = 2.7/1.0 was isolated. Recrystallization from toluene at -30 °C gave 860 mg (45%) of pure *rac*-**M5**. Anal. calc. for C<sub>54</sub>H<sub>54</sub>N<sub>2</sub>SiZr: C, 76.27; H, 6.40; N, 3.29. Found: C, 76.14; H, 6.42; N, 3.21. <sup>1</sup>H NMR (400 MHz, CDCl<sub>3</sub>): δ 8.18 (d, *J* = 7.3 Hz, 2H), 8.13 (m, 2H), 7.69 (m, 4H), 7.53 (d, *J* = 7.2 Hz, 2H), 7.20–7.37 (m, 8H), 7.15 (m, 2H), 7.10 (m, 2H), 6.65 (s, 2H), 2.72 (m, 2H), 2.16 (m, 2H), 1.49–1.68 (m, 4H), 1.36–1.45 (m, 4H), 1.24 (s, 6H), 0.98 (t, *J* = 7.3 Hz, 6H), -1.08 (s, 6H). <sup>13</sup>C NMR (100 MHz, CDCl<sub>3</sub>): δ 141.1, 140.4, 140.3, 134.1, 128.9, 127.4,

125.7, 125.2, 125.0, 123.8, 123.7, 123.6, 123.0, 120.13, 120.09, 120.0, 119.8, 113.2, 111.6, 111.4, 79.2, 39.0, 35.1, 31.8, 22.3, 14.0, 3.3.

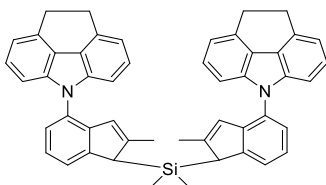

**Bis(4-(8,9-dihydro-4H-benzo[def]carbazol-4-yl)-2-methyl-1H-inden-1-yl)dimethylsilane (L6).**

General method B was applied using 6.65 g (20.6 mmol) of 4-(2-methyl-1H-inden-4-yl)-8,9-dihydro-4H-benzo[def]carbazole (**9**). Yield: 3.8 g (53%) as a mixture of isomers (ca. 93% purity by NMR). *Meso*-isomer: <sup>1</sup>H NMR (400 MHz, CDCl<sub>3</sub>): δ 7.50 (d, *J* = 7.5 Hz, 2H), 7.46 (d, *J* = 7.7 Hz, 2H), 7.29–7.35 (m, 6H), 7.17 (d, *J* = 8.1 Hz, 2H), 7.06 (d, *J* = 7.2 Hz, 4H) 7.01 (d, *J* = 8.0 Hz,

2H), 6.44 (m, 2H), 3.95 (s, 2H), 3.43 (m, 8H), 2.26 (s, 6H), -0.05 (s, 3H), -0.08 (s, 3H). *Rac*-isomer: <sup>1</sup>H NMR (400 MHz, CDCl<sub>3</sub>): δ 7.63 (d, *J* = 7.5 Hz, 2H), 7.46–7.50 (m, 2H), 7.29–7.37 (m, 6H), 7.18 (m, 2H), 7.07 (m, 4H), 7.02 (m, 2H), 6.45 (m, 2H), 4.00 (s, 2H), 3.44 (m, 8H), 2.22 (s, 6H), -0.10 (s, 6H). <sup>13</sup>C NMR (100 MHz, CDCl<sub>3</sub>): δ 147.2, 146.1, 145.8, 142.0, 142.5, 140.0, 139.9, 139.6, 138.9, 128.38, 128.35, 126.8, 126.4, 124.4, 124.2, 123.9, 123.0,

122.1, 121.69, 121.66, 121.5, 118.1, 118.0, 117.9, 109.2, 109.1, 109.0, 48.0, 47.8, 30.7, 26.4, 17.7, 17.6, -5.6, -5.9, -6.0. HRMS (ESI) calc. for  $C_{50}H_{42}N_2NaSi^+$ : 721.3009 [M + Na] $^+$ ; found: 721.3012.

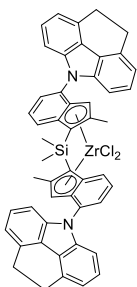

**Rac-dimethylsilanediylbis[ $\eta^5$ -4-(8,9-dihydro-4H-benzo[def]carbazol-4-yl)-2-methyl-1H-inden-1-yl]zirconium dichloride (C6).** General method C was applied using 3.9 g (5.6 mmol) of bis(4-(8,9-dihydro-4H-benzo[def]carbazol-4-yl)-2-methyl-1H-inden-1-yl)dimethylsilane (L6). First recrystallization of the residue from toluene gave 600 mg (12%) of pure *rac*-C6. **Rac-C6:** Anal. calc. for  $C_{50}H_{40}Cl_2N_2SiZr$ : C, 69.91; H, 4.69; N, 3.26. Found: C, 70.07; H, 4.76; N, 3.22.  $^1H$  NMR (400 MHz,  $CDCl_3$ ):  $\delta$  7.74 (d,  $J$  = 8.8 Hz, 2H), 7.58 (m, 4H), 7.16–7.26 (m, 6H), 6.99 (d,  $J$  = 7.2 Hz, 2H), 6.96 (d,  $J$  = 7.2 Hz, 2H), 6.82 (s, 2H), 6.77 (d,  $J$  = 8.1 Hz, 2H), 3.33 (m, 8H), 2.35 (s, 6H), 1.40 (s, 6H).  $^{13}C\{^1H\}$  NMR (100 MHz,  $CDCl_3$ ):  $\delta$  138.6, 138.5, 135.8, 135.5, 130.9, 130.7, 130.1, 129.0, 128.5, 128.2, 127.0, 126.3, 125.9, 124.2, 123.9, 123.7, 123.4, 120.4, 117.8, 117.5, 84.3, 26.6,

26.5, 18.8, 2.6.

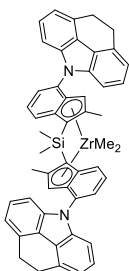

**Rac-dimethylsilanediylbis[ $\eta^5$ -4-(8,9-dihydro-4H-benzo[def]carbazol-4-yl)-2-methyl-1H-inden-1-yl]dimethylzirconium (M6).** General method D was applied using 400 mg of pure *rac*-C6. Recrystallization from toluene at room temperature gave 256 mg (67%) of pure *rac*-M6. Anal. calc. for  $C_{52}H_{46}N_2SiZr$ : C, 76.33; H, 5.67; N, 3.42. Found: C, 76.38; H, 5.72; N, 3.38.  $^1H$  NMR (400 MHz,  $CDCl_3$ ):  $\delta$  7.63 (d,  $J$  = 8.7 Hz, 2H), 7.50 (d,  $J$  = 7.1 Hz, 2H), 7.25–7.34 (m, 4H), 7.16–7.20 (m, 2H), 7.09–7.14 (m, 2H), 7.05 (d,  $J$  = 7.2 Hz, 2H), 6.96–6.99 (m, 4H), 6.82 (s, 2H), 3.38 (m, 8H), 2.21 (s, 6H), 1.22 (s, 6H), -1.06 (s, 6H).  $^{13}C$  NMR (100 MHz,  $CDCl_3$ ):  $\delta$  138.6, 138.3, 135.4, 134.8, 130.6, 130.4, 129.1, 126.6, 126.4, 126.3, 124.1, 123.8, 123.5, 121.2, 117.6, 117.4, 114.5, 109.6, 109.5,

79.9, 38.5, 26.6, 26.5, 18.3, 2.7.

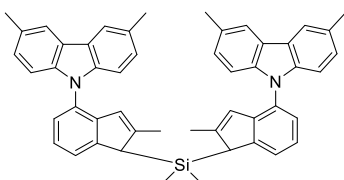

**Bis[2-methyl-4-(3',6'-dimethylcarbazol-9-yl)-1H-inden-1-yl](dimethyl)silanes (L7).** General Method A was applied using 8.0 g (24.6 mmol) of 3,6-dimethyl-9-(2-methyl-1H-inden-7-yl)-9H-carbazole (7). Yield: 7.0 g (81%) as a mixture of two isomers (ca. 90% purity by NMR).  $^1H$  NMR (mixture of two isomers, 400 MHz,  $CDCl_3$ ):  $\delta$  7.94 (m, 4H), 7.65 (m, 1H), 7.52 (m, 1H), 7.30–7.39 (m, 4H), 7.10–7.21 (m, 6H), 7.00–7.05 (m, 2H), 6.19 (m, 2H), 3.94 (m, 2H), 2.56 (s,

12H), 2.20 (s, 6H), 2.14 (s, 6H).  $^{13}C$  NMR (100 MHz,  $CDCl_3$ ):  $\delta$  148.2, 147.0, 146.9, 142.9, 142.8, 139.82, 139.79, 139.7, 139.1, 128.63, 128.55, 127.0, 126.9, 124.8, 124.6, 124.0, 123.9, 123.1, 122.6, 122.51, 122.48, 120.12, 120.08, 120.0, 109.81, 109.77, 109.7, 48.02, 47.95, 25.6, 21.4, 18.0, 17.9, -5.7, -6.0, -6.1. HRMS (ESI) calc. for  $C_{50}H_{46}N_2NaSi^+$ : 725.3322 [M + Na] $^+$ ; found: 725.3318.

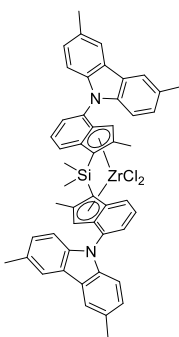

**Meso- and *rac*-dimethylsilanediylbis[ $\eta^5$ -4-(3,6-dimethylcarbazol-4-yl)-2-methyl-1H-inden-1-yl]zirconium dichloride (C7).** General Method C was applied using 4.8 g (6.83 mmol) of bis(2-methyl-4-(3,6-dimethyl-9H-carbazol-9-yl)-1H-inden-1-yl)dimethylsilane (L7). Recrystallizations from toluene gave two crops of crystals: 3.3 g *rac/meso* = 3/4 (56%) and 140 mg *rac/meso* = 6/1 (2%). **Rac-C7:**  $^1H$  NMR (400 MHz,  $CDCl_3$ ):  $\delta$  7.81–7.85 (m, 4H), 7.74–7.79 (m, 4H), 7.52 (d,  $J$  = 7.4 Hz, 2H), 7.15 (m, 2H), 7.10 (d,  $J$  = 8.6 Hz, 2H), 7.05 (d,  $J$  = 8.1 Hz 2H), 6.71 (d,  $J$  = 8.4 Hz, 2H), 6.64 (s, 2H), 2.50 (s, 6H), 2.48 (s, 6H), 2.33 (s, 6H), 1.38 (s, 6H).

**Meso-C7:**  $^1H$  NMR (400 MHz,  $CDCl_3$ ):  $\delta$  7.82–7.84 (m, 8H), 7.45 (d,  $J$  = 7.1 Hz, 2H), 7.04–7.18 (m, 6H), 6.71 (m, 2H), 6.53 (s, 2H), 2.49 (s, 6H), 2.41 (s, 6H), 2.35 (s, 6H), 1.54 (s, 3H), 1.26 (s, 3H).

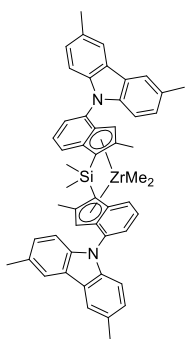

**Rac-dimethylsilanediylbis[ $\eta^5$ -4-(3,6-dimethylcarbazol-4-yl)-2-methyl-1H-inden-1-yl]dimethylzirconium (M7).** General Method E was applied using 1.84 g of **C7** with ratio *rac/meso* = 3/4. After methylation and LiCl treatment, the ratio of isomers became *rac/meso* = 5/2. Recrystallization of the solid from toluene/hexane mixture gave 800 mg (49%) of pure *rac*-**M7**. Anal. calc. for C<sub>52</sub>H<sub>50</sub>N<sub>2</sub>SiZr: C, 75.95; H, 6.13; N, 3.41. Found: C, 75.87; H, 6.26; N, 3.39. <sup>1</sup>H NMR (400 MHz, CD<sub>2</sub>Cl<sub>2</sub>):  $\delta$  7.90 (d, *J* = 14.2 Hz, 4H), 7.68 (d, *J* = 8.7 Hz, 2H), 7.49 (m, 4H), 7.11–7.18 (m, 4H), 7.05 (m, 2H), 6.93 (d, *J* = 8.4 Hz, 2H), 6.57 (s, 2H), 2.54 (s, 6H), 2.49 (s, 6H), 2.18 (s, 6H), 1.20 (s, 6H), -1.10 (s, 6H). <sup>13</sup>C NMR (100 MHz, CD<sub>2</sub>Cl<sub>2</sub>):  $\delta$  139.5, 139.3, 135.7, 134.6, 129.5, 129.4, 127.6, 127.1, 127.0, 125.4, 124.09, 124.06, 123.98, 123.4, 120.3, 120.2, 115.1, 111.5, 111.4, 80.5, 38.3, 21.5, 21.4, 18.6, 2.8.

**Bis[2-methyl-4-(2',7'-dimethylcarbazol-9-yl)-1H-indene-1-yl]dimethylsilanes (L8).** General Method A was applied using 8.0 g (24.6 mmol) of 2,7-dimethyl-9-(2-methyl-1H-inden-7-yl)-9H-carbazole (**27**). Yield: 7.2 g (83%) as a mixture of two isomers (ca. 93% purity by NMR). <sup>1</sup>H NMR (mixture of two isomers, 400 MHz, CDCl<sub>3</sub>):  $\delta$  8.04 (m, 4H), 7.74 (m, 1H), 7.60 (m, 1H), 7.35–7.43 (m, 4H), 7.05–7.14 (m, 6H), 6.92 (s, 2H), 6.24 (s, 2H), 4.00–4.04 (m, 2H), 2.50 (s, 6H), 2.47 (s, 6H), 2.26 (s, 3H), 2.20 (s, 3H), 0.07–0.02 (m, 6H). <sup>13</sup>C NMR (100 MHz, CD<sub>2</sub>Cl<sub>2</sub>):  $\delta$  148.40, 148.38, 146.90, 146.86, 143.1, 143.0, 141.8, 141.74, 141.73, 135.5, 135.4, 135.3, 129.22, 129.15, 124.87, 124.84, 124.81, 124.74, 124.67, 124.04, 123.97, 122.9, 122.73, 122.70, 121.99, 120.96, 120.92, 120.89, 119.6, 119.5, 110.2, 110.12, 110.09, 48.10, 48.05, 22.09, 22.07, 22.06, 18.03, 17.96, -5.8, -6.1, -6.2. HRMS (ESI) calc. for C<sub>50</sub>H<sub>46</sub>N<sub>2</sub>NaSi<sup>+</sup>: 725.3322 [M + Na]<sup>+</sup>; found: 725.3321.

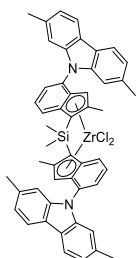

**Meso- and rac-dimethylsilanediylbis[ $\eta^5$ -4-(2,7-dimethylcarbazol-4-yl)-2-methyl-1H-inden-1-yl]zirconium dichloride (C8).** General Method C was applied using 5.4 g (7.7 mmol) of bis(2-methyl-4-(2,7-dimethyl-9H-carbazol-9-yl)-1H-inden-1-yl)dimethylsilane (**L8**). Recrystallizations from toluene gave two crops of crystals: 880 mg *rac/meso* = 1/11 (13%) and 1.33 g *rac/meso* = 3/2 (20%). **Rac-C8**: <sup>1</sup>H NMR (400 MHz, CDCl<sub>3</sub>):  $\delta$  7.90–7.95 (m, 4H), 7.79–7.83 (m, 4H), 7.61 (d, *J* = 7.4 Hz, 2H), 7.04–7.08 (m, 6H), 6.66–6.70 (m, 4H), 2.42 (s, 6H), 2.40 (s, 6H), 2.39 (s, 6H), 1.40 (s, 6H). **Meso-C8**: <sup>1</sup>H NMR (400 MHz, CDCl<sub>3</sub>):  $\delta$  7.89–7.96 (m, 6H), 7.83 (br.s, 2H), 7.48 (d, *J* = 7.1 Hz, 2H), 7.13 (m, 2H), 7.03–7.06 (m, 4H), 6.53–6.56 (m, 4H), 2.44 (s, 12H), 2.36 (s, 6H), 1.58 (s, 3H), 1.30 (s, 3H).

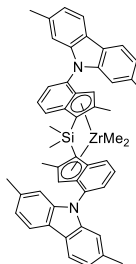

**Rac-dimethylsilanediylbis[ $\eta^5$ -4-(2,7-dimethylcarbazol-4-yl)-2-methyl-1H-inden-1-yl]dimethylzirconium (M8).** General Method D was applied using 1.33 g of a mixture of isomers of **C8** *rac/meso* = 3/2. After methylation, a series of recrystallizations from toluene gave 180 mg (17%) of pure *rac*-**M8**. Anal. calc. for C<sub>52</sub>H<sub>50</sub>N<sub>2</sub>SiZr: C, 75.95; H, 6.13; N, 3.41. Found: C, 75.73; H, 6.02; N, 3.54. <sup>1</sup>H NMR (400 MHz, CD<sub>2</sub>Cl<sub>2</sub>):  $\delta$  7.95 (d, *J* = 7.9 Hz, 2H), 7.92 (d, *J* = 7.9 Hz, 2H), 7.70 (m, 2H), 7.50 (m, 2H), 7.38 (m, 2H), 7.16 (dd, *J* = 8.7 Hz, 7.2 Hz, 2H), 7.07 (m, 2H), 7.01 (m, 2H), 6.81 (m, 2H), 6.56 (s, 2H), 2.41 (s, 6H), 2.27 (s, 6H), 2.18 (s, 6H), 1.21 (s, 6H), -1.00 (s, 6H). <sup>13</sup>C{<sup>1</sup>H} NMR (100 MHz, CD<sub>2</sub>Cl<sub>2</sub>):  $\delta$  141.7, 141.5, 135.9, 135.74, 135.68, 134.4, 129.3, 128.3, 125.7, 124.14, 124.10, 121.9, 121.8, 121.7, 121.6, 119.78, 119.76, 115.3, 112.1, 111.6, 80.3, 38.5, 22.2, 22.1, 18.6, 2.8.

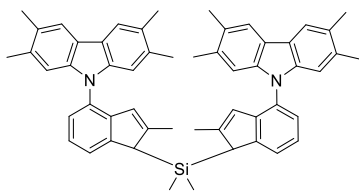

**Bis[2-methyl-4-(2',3',6',7'-tetramethylcarbazol-9-yl)-1H-inden-1-yl]dimethylsilanes (L9).** General Method A was applied using 9.0 g (25.6 mmol) of 2,3,6,7-tetramethyl-9-(2-methyl-1H-inden-7-yl)-9H-carbazole (**28**). Yield: 6.5 g (67%) as a mixture of two isomers with ratio *meso/rac* = 1/1.5 (ca. 96% purity by NMR). <sup>1</sup>H NMR (mixture of two isomers, 400 MHz, CDCl<sub>3</sub>):  $\delta$  7.99 (m, 4H), 7.80 (m, 1H), 7.68 (m, 1H), 7.43–7.52 (m, 4H), 7.17 (m, 2H), 7.00 (m, 2H), 6.34 (m, 2H), 4.10 (s) and 4.06 (s) (sum 2H), 2.56 (m, 12H), 2.48 (s) and 2.47 (s) (sum 6H), 2.45 (s) and 2.44 (s) (sum 6H), 2.32 (m) and 2.26 (m) (sum 6H), (0.06 (s) and 0.05 (s) and 0.03 (s) (sum 6H)). <sup>13</sup>C{<sup>1</sup>H} NMR

(100 MHz, two isomers *meso*\*/*rac*° = 1/1.5, CDCl<sub>3</sub>): δ 148.2, 146.9\*, 146.8°, 143.1°, 143.0\*, 140.2°, 140.2\*, 134.2, 134.0, 129.7°, 129.6\*, 127.8, 127.7, 124.9, 124.7, 124.6, 124.0°, 123.9\*, 122.5\*, 122.4°, 121.3, 121.2, 120.3, 110.7, 110.52\*, 110.48, 48.1°, 48.0\*, 20.8°, 20.7\*, 20.0, 18.0\*, 17.9°, -5.8\*, -6.1\*, -6.2°. HRMS (ESI) calc. for C<sub>54</sub>H<sub>54</sub>N<sub>2</sub>NaSi<sup>+</sup>: 781.3948 [M + Na]<sup>+</sup>; found: 781.3955.

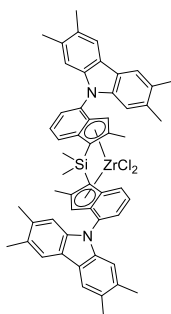

**Meso- and *rac*-dimethylsilanediylbis[η<sup>5</sup>-4-(2,3,6,7-tetramethylcarbazol-4-yl)-2-methyl-1H-inden-1-yl]zirconium dichloride (C9).** General Method C was applied using 4.7 g (6.19 mmol) of bis(2-methyl-4-(2,3,6,7-dimethyl-9H-carbazol-9-yl)-1H-inden-1-yl)dimethylsilane (L9). Recrystallizations from toluene gave 2.64 g of mixture *rac/meso* = 1/8 (46%). **Rac-C9:** <sup>1</sup>H NMR (400 MHz, CDCl<sub>3</sub>): δ 7.77–7.80 (m, 8H), 7.57 (m, 2H), 7.22 (m, 2H), 6.68 (d, *J* = 7.6 Hz, 4H), 2.41 (br.s, 12H), 2.31 (s, 6H), 2.27 (s, 6H), 2.26 (s, 6H), 1.37 (s, 6H). **Meso-C9:** <sup>1</sup>H NMR (400 MHz, CD<sub>2</sub>Cl<sub>2</sub>): δ 7.95 (d, *J* = 8.7 Hz, 2H), 7.75–7.79 (m, 6H), 7.45 (d, *J* = 7.2 Hz, 2H), 7.11 (dd, *J* = 8.7 Hz, 7.3 Hz, 2H), 6.52 (s, 2H), 6.48 (m, 2H), 2.42 (s, 6H), 2.39 (s, 6H), 2.38 (s, 6H), 2.34 (s, 6H), 2.25 (s, 6H), 1.58 (s, 3H), 1.30 (s, 3H). <sup>13</sup>C{<sup>1</sup>H} NMR (100 MHz, CDCl<sub>3</sub>): 139.8, 139.7, 138.3, 134.8, 134.4, 134.33, 134.28, 129.5, 129.0, 128.7, 126.2, 125.7, 125.1, 122.3, 122.1, 120.5, 120.2, 119.9, 113.1, 111.6, 86.3, 21.1, 20.8, 20.1, 20.0, 19.3, 2.9, 2.7.

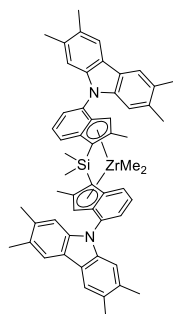

**Rac-dimethylsilanediylbis[η<sup>5</sup>-4-(2,3,6,7-tetramethylcarbazol-4-yl)-2-methyl-1H-inden-1-yl]dimethylzirconium (M9).** General Method E was applied using 1.5 g of a mixture of isomers of C9 *rac/meso* = 1/8. Series of recrystallizations from toluene gave 615 mg (43%) of pure *rac*-M9. Anal. calc. for C<sub>56</sub>H<sub>58</sub>N<sub>2</sub>SiZr: C, 76.57; H, 6.66; N, 3.19. Found: C, 76.66; H, 6.82; N, 3.01. <sup>1</sup>H NMR (400 MHz, CD<sub>2</sub>Cl<sub>2</sub>): δ 7.80 (s, 2H), 7.78 (s, 2H), 7.66 (d, *J* = 8.7 Hz, 2H), 7.46 (d, *J* = 7.2 Hz, 2H), 7.34 (s, 2H), 7.13 (dd, *J* = 8.6 Hz, 7.2 Hz, 2H), 6.79 (s, 2H), 6.55 (s, 2H), 2.42 (s, 6H), 2.37 (s, 6H), 2.30 (s, 6H), 2.17 (s, 6H), 2.16 (s, 6H), 1.20 (s, 6H), -1.04 (s, 6H). <sup>13</sup>C{<sup>1</sup>H} NMR (100 MHz, CD<sub>2</sub>Cl<sub>2</sub>): δ 140.1, 139.8, 135.7, 134.8, 134.5, 134.4, 129.3, 128.7, 128.6, 128.1, 125.3, 124.1, 123.7, 122.1, 122.0, 120.38, 120.36, 115.4, 112.4, 112.0, 80.2, 38.4, 20.9, 20.8, 20.1, 20.0, 18.5, 2.8.

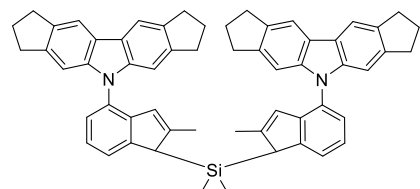

**Bis[2-methyl-4-(2',3',5',7',8',9'-hexahydro-1H-dicyclopenta[*b,h*]carbazol-9-yl)-1H-inden-1-yl]dimethylsilanes (L10).** General method A was applied using 10.0 g (26.6 mmol) of 5-(2-methyl-1H-inden-7-yl)-2,3,5,7,8,9-hexahydro-1H-dicyclopenta[*b,h*]carbazole (29). Yield: 6.8 g (63%) as a mixture of two isomers (ca. 95% purity by NMR). <sup>1</sup>H NMR (mixture of two isomers, 400 MHz, CDCl<sub>3</sub>): δ 7.93 (s, 4H), 7.67 (m, 1H), 7.54 (m, 1H), 7.33–7.36 (m, 4H), 7.03 (m, 2H), 6.90 (s, 2H), 6.22 (br.s, 2H), 3.96 (s, 1H), 3.93 (s, 1H), 3.08 (m, 8H), 2.91–2.99 (m, 8H), 2.21 (s, 3H), 2.15 (s, 3H), 2.13–2.18 (m, 8H), -0.13– -0.10 (m, 6H). <sup>13</sup>C{<sup>1</sup>H} NMR (100 MHz, CDCl<sub>3</sub>): δ 148.2, 146.9, 146.8, 143.2, 143.1, 142.2, 142.1, 141.2, 135.54, 135.46, 129.7, 129.6, 124.93, 124.87, 124.8, 124.0, 123.9, 122.6, 122.5, 122.2, 114.9, 105.5, 77.3, 76.7, 48.1, 48.0, 33.3, 32.5, 26.42, 26.39, 18.02, 17.95, -5.7, -6.07, -6.10. HRMS (ESI) calc. for C<sub>58</sub>H<sub>54</sub>N<sub>2</sub>NaSi<sup>+</sup>: 829.3948 [M + Na]<sup>+</sup>; found: 829.3940.

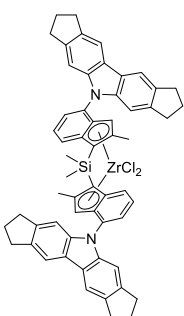

**Meso- and *rac*-dimethylsilanediylbis[η<sup>5</sup>-2-methyl-4-(2',3',5',7',8',9'-hexahydro-1H-dicyclopenta[*b,h*]carbazol-9-yl)-1H-inden-1-yl]zirconium dichloride (C10).** General Method C was applied using 5.0 g (6.2 mmol) of bis[2-methyl-4-(2',3',5',7',8',9'-hexahydro-1H-dicyclopenta[*b,h*]carbazol-9-yl)-1H-inden-1-yl]dimethylsilanes (L10). Recrystallizations from toluene gave four crops of crystals: 1.57 g *rac/meso* = 1/3 (26%), 0.97 g *rac/meso* = 1.33/1.00 (16%), 1.07 g *rac/meso* = 1.5/1.0 (18%) and 220 mg *rac/meso* = 2/1 (4%). **Rac-C10:** <sup>1</sup>H NMR (400 MHz, CDCl<sub>3</sub>): δ 7.83–7.86 (m, 6H), 7.77 (d, *J* = 8.7 Hz, 2H), 7.59 (d, *J* = 7.1 Hz, 2H), 7.18–7.28 (m, 2H), 6.72 (s, 2H), 6.67 (s, 2H), 3.01–3.05 (m, 8H), 2.87–2.94 (m, 8H), 2.32 (s, 6H), 2.08–2.13 (m, 8H), 1.38 (s, 6H). **Meso-C10:** <sup>1</sup>H NMR (400 MHz, CDCl<sub>3</sub>): δ 7.91 (d, *J* = 8.6 Hz, 2H), 7.82–7.86 (m, 6H), 7.47 (d, *J* = 7.4 Hz, 2H), 7.10 (m, 2H), 6.58 (m, 4H), 3.03 (m, 8H), 2.84–2.92 (m, 8H), 2.44 (s, 6H), 2.07–2.16 (m, 8H), 1.57 (s, 3H), 1.29 (s, 3H).



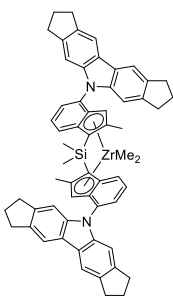

**Rac-dimethylsilanediylbis[ $\eta^5$ -2-methyl-4-(2',3',5',7',8',9'-hexahydro-1H-dicyclopenta[*b,h*]carbazol-9-yl)-1H-inden-1-yl]dimethylzirconium (M10).** General Method E was applied using 1.4 g mixture of isomers of **C10** *rac/meso* = 1/3. A series of recrystallizations from toluene gave 603 mg (45%) of pure *rac*-**M10**. Anal. calc. for  $C_{60}H_{58}N_2SiZr$ : C, 77.79; H, 6.31; N, 3.02. Found: C, 78.02; H, 6.25; N, 2.87.  $^1H$  NMR (400 MHz,  $CD_2Cl_2$ ):  $\delta$  7.86 (d,  $J$  = 11.6 Hz, 4H), 7.66 (d,  $J$  = 8.6 Hz, 2H), 7.49 (d,  $J$  = 7.1 Hz, 2H), 7.39 (s, 2H), 7.12–7.16 (m, 2H), 6.86 (s, 2H), 6.54 (s, 2H), 2.99–3.06 (m, 8H), 2.87–2.98 (m, 4H), 2.74–2.84 (m, 4H), 2.17 (s, 6H), 2.04–2.15 (m, 8H), 1.19 (s, 6H), -1.01 (s, 6H).  $^{13}C\{^1H\}$  NMR (100 MHz,  $CD_2Cl_2$ ):  $\delta$  142.49, 142.48, 141.0, 140.7, 136.5, 136.4, 135.7, 134.9, 129.3, 128.3, 125.5, 124.1, 123.9, 123.1, 123.0, 115.5, 115.03, 114.98, 107.6, 106.9, 80.1, 38.4, 33.7, 33.5, 32.80, 32.76, 26.8, 18.6, 2.8.

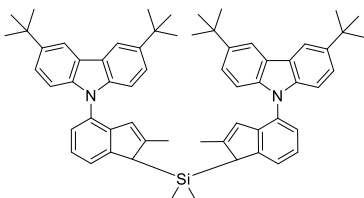

**Bis[2-methyl-4-(3',6'-di-*tert*-butylcarbazol-9-yl)-1H-inden-1-yl]dimethylsilanes (L11).** General Method A was applied using 15.6 g (38.3 mmol) of 3,6-di-*tert*-butyl-9-(2-methyl-1H-inden-7-yl)-9H-carbazole (**8**). Yield: 14.3 g (86%) as a mixture of two isomers (ca. 92% purity by NMR).  $^1H$  NMR (mixture of two isomers, 400 MHz,  $CDCl_3$ ):  $\delta$  8.22 (m, 4H), 7.71 (m, 1H), 7.55 (m, 1H), 7.47 (m, 4H), 7.33–7.40 (m, 4H), 7.25 (m, 2H), 7.11 (m, 2H), 6.32 (m, 2H), 4.03 (m, 1H), 3.99 (m, 1H), 2.27 (s, 3H), 2.21 (s, 3H), 1.52 (s, 36H), -0.10– -0.06 (m, 6H).  $^{13}C\{^1H\}$  NMR (100 MHz, mixture of isomers,  $CDCl_3$ ):  $\delta$  148.1, 146.9, 146.0, 145.5, 142.8, 142.7, 142.4, 142.3, 139.8, 139.7, 139.2, 129.6, 129.5, 125.4, 125.1, 125.0, 124.6, 124.5, 124.0, 123.9, 123.4, 123.13, 123.06, 122.6, 122.4, 116.2, 116.1, 116.00, 109.6, 109.5, 109.4, 67.9, 65.8, 48.1, 48.0, 43.2, 34.7, 32.1, 25.6, 18.1, 18.0, 16.8, 16.6, -5.7, -5.9, -6.2. HRMS (ESI) calc. for  $C_{62}H_{70}N_2NaSi^+$ : 893.5200 [M + Na] $^+$ ; found: 893.5203.

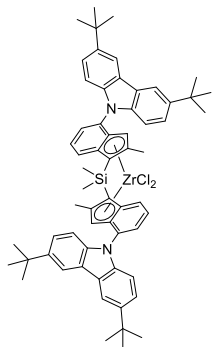

**Meso- and *rac*-dimethylsilanediylbis[ $\eta^5$ -4-(3,6-di-*tert*-butylcarbazol-4-yl)-2-methyl-1H-inden-1-yl]zirconium dichloride (C11).** General Method C was applied using 8.7 g (10.0 mmol) of bis(2-methyl-4-(3,6-di-*tert*-butyl-9H-carbazol-9-yl)-1H-inden-1-yl)dimethylsilane (**L11**). Recrystallizations from toluene gave three crops of crystals: 4.10 g *rac/meso* = 1/1 (40%), pure *meso*-isomer 930 mg (9%) and pure *rac*-isomer 2.06 g (20%). **Meso-C11**: Anal. calc. for  $C_{62}H_{68}Cl_2N_2SiZr$ : C, 72.20; H, 6.65; N, 2.72. Found: C, 72.63; H, 6.78; N, 2.54.  $^1H$  NMR (400 MHz,  $CDCl_3$ ):  $\delta$  8.05 (m, 4H), 7.86 (m, 4H), 7.42 (m, 2H), 7.35 (m, 2H), 7.26 (m, 2H), 7.03 (m, 2H), 6.74 (m, 2H), 6.59 (br.s, 2H), 2.41 (s, 6H), 1.54 (s, 3H), 1.41 (s, 36H), 1.26 (s, 3H). **Rac-C11**: Anal. calc. for  $C_{62}H_{68}Cl_2N_2SiZr$ : C, 72.20; H, 6.65; N, 2.72. Found: C, 72.34; H, 6.71; N, 2.70.  $^1H$  NMR (500 MHz,  $CD_2Cl_2$ ):  $\delta$  8.13 (d,  $J$  = 18.1 Hz, 4H), 7.82 (d,  $J$  = 8.6 Hz, 4H), 7.54 (d,  $J$  = 7.0 Hz, 2H), 7.34 (d,  $J$  = 8.6 Hz, 4H), 7.13–7.25 (m, 2H), 6.75 (d,  $J$  = 8.6 Hz, 2H), 6.66 (s, 2H), 2.36 (s, 6H), 1.45 (s, 18H), 1.42 (s, 18H), 1.41 (s, 6H).  $^{13}C\{^1H\}$  NMR (126 MHz,  $CD_2Cl_2$ ):  $\delta$  143.5, 143.2, 139.6, 139.3, 136.5, 135.2, 131.7, 128.7, 126.3, 126.2, 125.2, 124.2, 124.1, 124.0, 123.5, 121.3, 116.7, 116.3, 112.0, 110.5, 85.2, 35.01, 34.99, 32.2, 32.1, 19.1, 2.7.

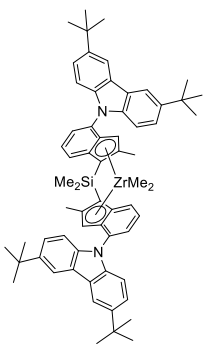

**Rac-dimethylsilanediylbis[ $\eta^5$ -4-(3,6-di-*tert*-butylcarbazol-4-yl)-2-methyl-1H-inden-1-yl]dimethylzirconium (M11).** General Method E was applied using 630 mg of **C11** as a mixture of isomers *rac/meso* = 1/2. Recrystallization from toluene/hexane mixture gave 260 mg (43%) of pure *rac*-**C11**. Anal. calc. for  $C_{64}H_{74}N_2SiZr$ : C, 77.60; H, 7.53; N, 2.83. Found: C, 77.31; H, 7.31; N, 2.91.  $^1H$  NMR (400 MHz,  $CD_2Cl_2$ ):  $\delta$  8.15 (d,  $J$  = 1.8 Hz, 2H), 8.11 (d,  $J$  = 1.8 Hz, 2H), 7.68 (d,  $J$  = 8.7 Hz, 2H), 7.53 (d,  $J$  = 8.6 Hz, 2H), 7.44 (d,  $J$  = 7.1 Hz, 2H), 7.40 (dd,  $J$  = 8.6 Hz, 1.9 Hz, 2H), 7.27 (dd,  $J$  = 8.6 Hz, 1.9 Hz, 2H), 7.17–7.25 (m, 2H), 7.12 (m, 2H), 6.65 (s, 2H), 2.21 (s, 6H), 1.46 (s, 18H), 1.40 (s, 18H), 1.22 (s, 6H), -1.08 (s, 6H).  $^{13}C\{^1H\}$  NMR (100 MHz,  $CD_2Cl_2$ ):  $\delta$  143.24, 143.15, 139.5, 139.4, 135.7, 134.9, 129.5, 127.6, 125.3, 124.2, 124.1, 124.0, 123.7, 123.6, 123.2, 116.6, 116.5, 115.2, 111.3, 111.2, 80.5, 38.4, 35.03, 34.96, 32.2, 32.1, 18.7, 2.8.

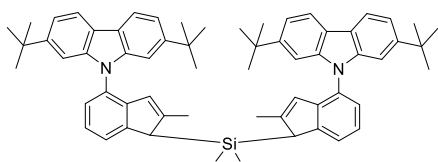

**Bis[2-methyl-4-(2',7'-di-tert-butylcarbazol-9-yl)-1H-inden-1-yl]dimethylsilanes (L12).** General Method B was applied using 8.0 g (19.6 mmol) of 2,7-di-tert-butyl-9-(2-methyl-1H-inden-7-yl)-9H-carbazole (**30**). Yield: 5.5 g (64%) as a mixture of two isomers (ca. 93% purity by NMR).  $^1\text{H}$  NMR (400 MHz,  $\text{CDCl}_3$ ):  $\delta$  7.91–7.99 (m, 4H), 7.66–

7.79 (m, 1H), 7.41–7.51 (m, 2H), 7.27–7.41 (m, 4H), 7.05–7.24 (m, 4H), 6.86–6.99 (m, 1H), 6.84 (s, 1H), 6.73 (s, 1H), 6.12–6.34 (m, 1H), 5.76–5.80 (m, 1H), 4.21 (s, 1H), 4.08 (s, 1H), 2.19 (s, 1H), 2.12 (s, 2H), 1.49 (s, 3H), 1.43 (s, 6H), 1.30–1.34 (m, 18H), 1.22 (s, 3H), 1.17 (s, 6H), 1.14 (s, 3H), -0.72–-0.50 (m, 6H).  $^{13}\text{C}\{^1\text{H}\}$  NMR (100 MHz,  $\text{CDCl}_3$ ):  $\delta$  148.9, 148.8, 148.10, 148.05, 147.10, 147.06, 142.9, 142.8, 141.7, 141.57, 141.56, 129.41, 129.35, 125.2, 124.7, 124.1, 124.0, 122.6, 122.5, 120.9, 119.4, 117.5, 117.33, 117.29, 106.8, 106.7, 106.52, 106.49, 47.9, 47.8, 35.13, 35.12, 35.09, 31.83, 31.79, 18.0, 17.9, -5.6, -5.7. HRMS (ESI) calc. for  $\text{C}_{62}\text{H}_{70}\text{N}_2\text{NaSi}^+$ : 893.5200  $[\text{M} + \text{Na}]^+$ ; found: 893.5194.

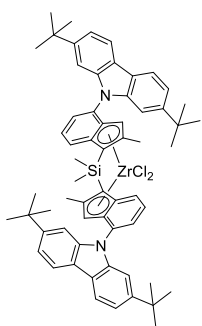

**Meso- and rac-dimethylsilanediybis[ $\eta^5$ -4-(2,7-di-tert-butylcarbazol-4-yl)-2-methyl-1H-inden-1-yl]zirconium dichloride (C12).** General Method C was applied using 5.6 g (6.43 mmol) of bis(2-methyl-4-(2,7-di-tert-butyl-9H-carbazol-9-yl)-1H-inden-1-yl)dimethylsilane (**L12**). Recrystallizations from toluene gave three crops of crystals: 850 mg pure *rac*-isomer, 370 mg pure *rac*-isomer (20% sum. yield of *rac*-isomer) and 1.36 g *rac/meso* = 2/9 (21%).

**Meso-C12:**  $^1\text{H}$  NMR (400 MHz,  $\text{CDCl}_3$ ):  $\delta$  7.95–7.97 (m, 4H), 7.89–7.93 (m, 4H), 7.52 (d,  $J$  = 7.1 Hz, 2H), 7.16–7.27 (m, 6H), 6.70 (m, 2H), 6.50 (s, 2H), 2.40 (s, 6H), 1.61 (s, 3H), 1.30 (s, 3H), 1.26 (s, 18H), 1.23 (s, 18H). **Rac-C12:** Anal. calc. for  $\text{C}_{62}\text{H}_{68}\text{Cl}_2\text{N}_2\text{SiZr}$ : C, 72.20; H, 6.65; N, 2.72. Found: C, 72.08; H, 6.71; N, 2.78.  $^1\text{H}$  NMR (400 MHz,  $\text{CD}_2\text{Cl}_2$ ):  $\delta$  7.97 (d,  $J$  = 8.1 Hz, 2H), 7.94 (m, 2H), 7.93 (d,  $J$  = 8.3 Hz, 2H), 7.86 (m, 2H), 7.62 (d,  $J$  = 7.1 Hz, 2H), 7.31 (dd,  $J$  = 8.2 Hz, 1.7 Hz, 2H), 7.24–7.28 (m, 4H), 6.84 (m, 2H), 6.64 (s, 2H), 2.38 (s, 6H), 1.46 (s, 6H), 1.28 (s, 18H), 1.22 (s, 18H).  $^{13}\text{C}\{^1\text{H}\}$  NMR (100 MHz,  $\text{CDCl}_3$ ):  $\delta$  149.6, 148.8, 141.3, 140.9, 136.3, 135.0, 131.5, 19.0, 126.2, 126.0, 125.0, 121.9, 121.7, 121.0, 119.6, 119.5, 118.6, 118.0, 109.0, 108.5, 85.6, 35.48, 35.32, 31.85, 31.81, 18.9, 2.7.

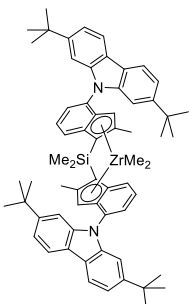

**Rac-dimethylsilanediybis[ $\eta^5$ -4-(2,7-di-tert-butylcarbazol-4-yl)-2-methyl-1H-inden-1-yl]dimethylzircononium (M12).** General method D was applied using 0.5 g (0.49 mmol) of pure *rac*-**C12**. Recrystallization from a toluene/hexane mixture gave 400 mg (83%) of pure *rac*-**M12**. Anal. calc. for  $\text{C}_{64}\text{H}_{74}\text{N}_2\text{SiZr}$ : C, 77.60; H, 7.53; N, 2.83. Found: C, 77.82; H, 7.94; N, 2.85.  $^1\text{H}$  NMR (400 MHz,  $\text{CD}_2\text{Cl}_2$ ):  $\delta$  8.00 (d,  $J$  = 8.2 Hz, 2H), 7.95 (d,  $J$  = 8.2 Hz, 2H), 7.74–7.76 (m, 4H), 7.56 (d,  $J$  = 7.2 Hz, 2H), 7.35 (m, 2H), 7.23–7.28 (m, 3H), 7.17–7.21 (m, 3H), 7.12 (m, 2H), 6.66 (s, 2H), 2.23 (s, 6H), 1.34 (s, 18H), 1.27 (s, 6H), 1.20 (s, 18H), 1.11 (s, 6H).  $^{13}\text{C}\{^1\text{H}\}$  NMR (100 MHz,  $\text{CD}_2\text{Cl}_2$ ):  $\delta$  149.3, 148.8, 141.1, 140.9, 135.5, 134.6, 129.9, 128.6, 127.2, 125.0, 124.1, 123.0, 121.7, 121.7, 119.6, 119.5, 118.3, 117.8, 115.1, 109.2, 108.5, 80.9, 38.3,

35.4, 31.9, 31.8, 18.4, 2.9.

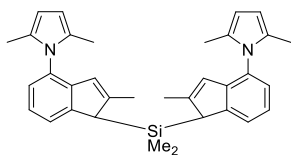

**Bis[2-methyl-4-(2',5'-dimethylpyrrol-1-yl)-1H-inden-1-yl]dimethylsilanes (L13).** General procedure A was applied using 14.6 g (65.4 mmol) of 2,5-dimethyl-1-(2-methyl-1H-inden-7-yl)-1H-pyrrole (**23**). Yield: 7.0 g (39%) as a mixture of two isomers with ratio 1/1 (ca. 95% purity by NMR).  $^1\text{H}$  NMR (400 MHz,  $\text{CDCl}_3$ ):  $\delta$  7.58 (d,  $J$  = 7.4 Hz, 1H), 7.42 (d,  $J$  = 7.4 Hz, 1H), 7.09–7.25 (m, 4H), 6.27 (br.s, 2H), 5.95

(br.s, 4H), 3.89–3.91 (m, 2H), 2.27 (s, 3H), 2.18 (s, 3H), 1.98–2.01 (m, 12H), -0.33–-0.28 (m, 6H).  $^{13}\text{C}\{^1\text{H}\}$  NMR (100 MHz, two isomers *meso/rac* = 1/1,  $\text{CDCl}_3$ ):  $\delta$  148.72, 148.67, 145.84, 145.81, 143.8, 143.7, 130.8, 130.7, 129.0, 125.2, 125.1, 124.2, 123.4, 123.3, 122.58, 122.56, 105.2, 47.95, 47.89, 17.96, 17.85, 12.82, 12.76, -6.3, -6.67, -6.70. HRMS (ESI) calc. for  $\text{C}_{34}\text{H}_{38}\text{N}_2\text{NaSi}^+$ : 525.2696  $[\text{M} + \text{Na}]^+$ ; found: 525.2693.

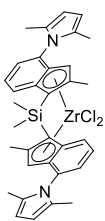

**Meso- and rac-dimethylsilanediylbis[ $\eta^5$ -2-methyl-4-(2,5-dimethyl-1H-pyrrol-1-yl)-1H-inden-1-yl]zirconium dichloride (C13).** General Method C was applied using 6.9 g (13.7 mmol) of bis(2-methyl-4-(2,5-dimethyl-1H-pyrrol-1-yl)-1H-inden-1-yl)dimethylsilane (L13). Recrystallizations from toluene gave two crops of crystals: 4.3 g *rac/meso* = 1.0/1.5 (47%), 390 mg *rac/meso* = 1.0/2.0 (4%). The first crop was recrystallized from toluene at room temperature giving 1.0 g *rac/meso* = 1/10. **Rac-C13:**  $^1\text{H NMR}$  (400 MHz,  $\text{CDCl}_3$ ):  $\delta$  7.73 (d,  $J$  = 8.6 Hz, 2H), 7.23 (m, 2H), 7.13 (m, 2H), 6.53 (s, 2H), 5.82 (m, 4H), 2.33 (s, 6H), 2.25 (s, 6H), 1.67 (s, 6H), 1.32 (s, 6H). **Meso-C13:**

$^1\text{H NMR}$  (400 MHz,  $\text{CDCl}_3$ ):  $\delta$  7.80 (d,  $J$  = 8.8 Hz, 2H), 7.09 (m, 2H), 6.96 (d,  $J$  = 7.1 Hz, 2H), 6.94 (d,  $J$  = 7.2 Hz, 2H), 6.48 (s, 2H), 5.83 (m, 4H), 2.46 (s, 6H), 2.24 (s, 6H), 1.66 (s, 6H), 1.47 (s, 3H), 1.25 (s, 3H).

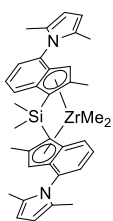

**Rac-dimethylsilanediylbis[ $\eta^5$ -2-methyl-4-(2,5-dimethyl-1H-pyrrol-1-yl)-1H-inden-1-yl]dimethylzirconium (M13).** General Method E was applied using 1.0 g (1.51 mmol) of C13 as a mixture *rac/meso* = 1/9. Recrystallization from a toluene/hexane mixture gave 623 mg (66%) of pure *rac*-M13. Anal. calc. for  $\text{C}_{36}\text{H}_{42}\text{N}_2\text{SiZr}$ : C, 69.51; H, 6.81; N, 4.50. Found: C, 69.38; H, 6.62; N, 4.61.  $^1\text{H NMR}$  (400 MHz,  $\text{CD}_2\text{Cl}_2$ ):  $\delta$  7.58 (d,  $J$  = 8.6 Hz, 2H), 7.17 (dd,  $J$  = 7.2 Hz, 0.8 Hz, 2H), 7.04 (dd,  $J$  = 8.6 Hz, 7.2 Hz, 2H), 6.51 (s, 2H), 5.86 (ddd,  $J$  = 12.2 Hz, 3.2 Hz, 0.8 Hz, 4H), 2.20 (s, 6H), 2.13 (s, 6H), 1.80 (s, 6H), 1.12 (s, 6H), -1.14 (s, 6H).  $^{13}\text{C}\{^1\text{H}\}$  NMR (100 MHz,  $\text{CD}_2\text{Cl}_2$ ):  $\delta$  136.1, 135.4, 130.7, 130.1, 129.7, 127.7, 126.3, 125.4, 123.6, 115.5, 106.68, 106.65, 79.7, 38.1, 18.7, 14.2, 13.1, 2.5.

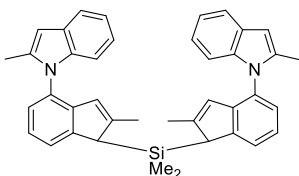

**Bis[2-methyl-4-(2'-methylindol-1-yl)-1H-inden-1-yl]dimethylsilanes (L14).**

General procedure B was applied using 3.2 g (12.3 mmol) of 2-methyl-1-(2-methyl-1H-inden-7-yl)-1H-indole (25). Yield: 2.6 g (69%) as a mixture of two isomers with ratio 1/1 (ca. 90% purity by NMR).  $^1\text{H NMR}$  (400 MHz,  $\text{CDCl}_3$ ):  $\delta$  7.39–7.61 (m, 4H), 6.85–7.8 (m, 10H), 6.40–6.45 (m, 2H), 6.10–6.19 (m, 2H), 3.90 (m, 2H), 1.99–2.27

(m, 12H), 0.23–0.35 (m, 2H), -0.27– -0.18 (m, 4H).  $^{13}\text{C}\{^1\text{H}\}$  NMR (100 MHz,  $\text{CDCl}_3$ ):  $\delta$  148.5, 148.41, 148.37, 146.12, 146.09, 146.06, 143.4, 143.3, 138.1, 137.3, 129.3, 129.23, 129.16, 127.9, 124.1, 124.0, 123.5, 123.4, 122.62, 122.57, 120.6, 120.5, 119.5, 119.4, 119.3, 119.2, 110.0, 109.9, 100.5, 77.1, 76.8, 76.5, 47.81, 47.75, 31.3, 22.4, 17.74, 17.66, 13.9, 13.0, 12.9, 6.6. HRMS (ESI) calc. for  $\text{C}_{40}\text{H}_{38}\text{N}_2\text{NaSi}^+$ : 597.2696 [M + Na] $^+$ ; found: 597.2700.

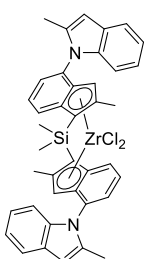

**Meso- and rac-dimethylsilanediylbis[ $\eta^5$ -2-methyl-4-(2-methyl-1H-indol-yl)-1H-inden-1-yl]zirconium dichloride (C14).** General Method C was applied using 2.6 g (4.5 mmol) of bis(2-methyl-4-(2-methyl-1H-indol-yl)-1H-inden-1-yl)dimethylsilane (L14). Recrystallizations from toluene gave two crops of crystals: 570 mg of pure *meso*-isomer (17%) and 1.8 g *rac/meso* = 1/1 (54%). **Meso-C14:** Anal. calc. for  $\text{C}_{40}\text{H}_{36}\text{Cl}_2\text{N}_2\text{SiZr}$ : C, 65.37; H, 4.94; N, 3.81. Found: C, 65.44; H, 5.10; N, 3.71.  $^1\text{H NMR}$  (400 MHz,  $\text{CD}_2\text{Cl}_2$ ):  $\delta$  7.88 (d,  $J$  = 8.7 Hz, 2H), 7.50 (d,  $J$  = 7.7 Hz, 2H), 7.18 (d,  $J$  = 6.8 Hz, 2H), 7.03 (m, 4H), 6.92 (m, 2H), 6.46 (dd,  $J$  = 8.2 Hz, 0.7 Hz, 2H), 6.40 (m, 4H), 2.54 (s, 6H), 2.41 (s, 6H), 1.54 (s, 3H), 1.28 (s, 3H).  $^{13}\text{C}\{^1\text{H}\}$  NMR (100 MHz,  $\text{CD}_2\text{Cl}_2$ ):  $\delta$  138.8,

138.17, 138.15, 135.1, 133.6, 129.2, 129.1, 126.8, 126.7, 124.9, 121.0, 120.3, 120.2, 119.9, 111.0, 102.8, 86.4, 19.2, 14.7, 2.8, 2.6. **Rac-C14:**  $^1\text{H NMR}$  (400 MHz,  $\text{CD}_2\text{Cl}_2$ ):  $\delta$  7.80 (d,  $J$  = 8.7 Hz, 2H), 7.50 (d,  $J$  = 7.7 Hz, 2H), 7.31 (d,  $J$  = 7.1 Hz, 2H), 7.18 (dd,  $J$  = 8.7 Hz, 7.1 Hz, 2H), 7.03 (m, 2H), 6.92 (ddd,  $J$  = 8.2 Hz, 7.1 Hz, 1.2 Hz, 2H), 6.49 (m, 2H), 6.46 (s, 2H), 6.39 (s, 2H), 2.53 (s, 6H), 2.30 (s, 6H), 1.38 (s, 6H).  $^{13}\text{C}\{^1\text{H}\}$  NMR (100 MHz,  $\text{CD}_2\text{Cl}_2$ ):  $\delta$  139.0, 138.4, 136.7, 134.4, 132.9, 129.1, 128.2, 127.5, 126.0, 121.9, 121.0, 120.3, 119.9, 110.9, 102.6, 85.4, 19.1, 14.6, 2.5.

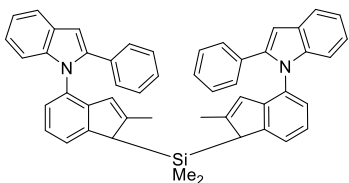

**Bis[2-methyl-4-(2'-phenylindol-1-yl)-1H-inden-1-yl]dimethylsilanes (L15).**

General Method B was applied using 3.1 g (9.5 mmol) of 2-phenyl-1-(2-methyl-1H-inden-7-yl)-1H-indole (26). Yield: 2.4 g (72%) as a mixture of two isomers with ratio 1/1 (ca. 93% purity by NMR).  $^1\text{H NMR}$  (400 MHz,  $\text{CDCl}_3$ ):  $\delta$  7.73 (m, 2H), 6.86–7.60 (m, 24H), 6.18–6.38 (m, 2H), 3.83–3.97 (m, 2H), 2.03–2.26 (m, 6H), -0.38– -0.11 (m, 6H).  $^{13}\text{C}\{^1\text{H}\}$  NMR (100 MHz,  $\text{CDCl}_3$ , mixture of

several rotomers of *rac/meso* mixture):  $\delta$  148.8, 148.74, 148.68, 148.66, 148.63, 148.57, 148.56, 146.5,

146.43, 146.39, 146.29, 146.25, 143.56, 143.55, 143.52, 143.48, 143.4, 143.23, 143.16, 143.14, 143.08, 141.7, 141.63, 141.59, 141.2, 139.64, 139.62, 139.4, 139.3, 132.82, 132.79, 132.70, 132.68, 130.5, 130.4, 130.33, 130.29, 130.22, 130.20, 130.15, 128.5, 128.24, 128.18, 128.09, 128.05, 128.0, 127.2, 127.1, 125.7, 125.64, 125.58, 125.55, 125.5, 125.42, 125.40, 124.5, 124.4, 124.3, 124.23, 124.20, 124.10, 124.05, 123.65, 123.56, 123.53, 123.49, 122.61, 122.58, 122.51, 122.47, 122.43, 122.41, 122.1, 122.0, 120.45, 120.42, 120.35, 111.1, 111.0, 103.1, 103.0, 102.9, 102.8, 48.09, 48.06, 48.0, 47.9, 47.7, 47.64, 47.62, 47.56, 18.11, 18.05, 18.02, 17.98, 17.91, 17.89, 17.8, -5.6, -5.7, -5.90, -5.92, -6.19, -6.23, -6.31, -6.33. HRMS (ESI) calc. for  $C_{50}H_{42}N_2NaSi^+$ : 721.3009 [M + Na]<sup>+</sup>; found: 721.3004.

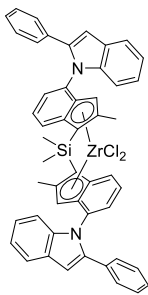

**Meso- and rac-dimethylsilanediybis[ $\eta^5$ -2-methyl-4-(2-phenyl-1H-indol-yl)-1H-inden-1-yl]zirconium dichloride (C15).** General Method C was applied using 2.3 g (3.3 mmol) of bis(2-methyl-4-(2-phenyl-1H-indol-yl)-1H-inden-1-yl)dimethylsilane (**L15**). Recrystallizations from toluene gave five crops of crystals: 500 mg *rac/meso* = 7/1 (18%), 510 mg *rac/meso* = 7/2 (19%), 430 mg *rac/meso* = 2/3 (15%), 490 mg *rac/meso* = 3/1 (16%), 150 mg *rac/meso* = 1/2 (5%). Subsequent recrystallizations of the first crops allowed to obtain 120 mg *rac/meso* = 19/1 (4%).

**Meso-C15:** <sup>1</sup>H NMR (400 MHz, CDCl<sub>3</sub>):  $\delta$  7.86–7.90 (m, 2H), 7.70 (m, 2H), 7.56–7.60 (m, 2H), 7.37 (m, 2H), 6.92–7.24 (m, 16H), 6.72 (m, 2H), 6.16 (s, 2H), 2.06 (s, 6H), 1.43 (s, 3H), 1.09 (s, 3H). **Rac-C15:** Anal. calc. for  $C_{50}H_{40}Cl_2N_2SiZr$ : C, 69.91; H, 4.69; N, 3.26. Found: C, 70.06; H, 4.70;

N, 3.35. <sup>1</sup>H NMR (400 MHz, CDCl<sub>3</sub>):  $\delta$  7.87 (m, 2H), 7.58 (m, 4H), 7.44 (d, *J* = 7.3 Hz, 2H), 6.98–7.10 (m, 16H), 6.72 (s, 2H), 6.31 (s, 2H), 2.02 (s, 6H), 1.24 (s, 6H). <sup>13</sup>C{<sup>1</sup>H} NMR (100 MHz, CDCl<sub>3</sub>):  $\delta$  140.0, 138.3, 135.6, 134.7, 133.4, 132.9, 128.3, 128.0, 127.9, 127.0, 126.9, 125.3, 124.6, 122.4, 120.9, 120.8, 120.1, 113.1, 104.5, 83.6, 18.2, 2.4.

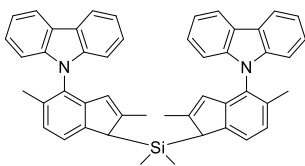

**Bis[2,5-dimethyl-4-(carbazol-9-yl)-1H-inden-1-yl]dimethylsilanes (L16).** General procedure B was applied using 9.32 g (29.8 mmol) of 2,5-dimethyl-7/4-(9H-carbazol-9-yl)-1/3H-indene (**31**). To a precipitate formed after Me<sub>2</sub>SiCl<sub>2</sub> addition, 50 mL of THF was added to dissolve LiCl. The precipitate was collected after filtration and dried in vacuum giving 4.45 g of pure *rac*-isomer as a white solid.

The filtrate was concentrated in vacuum and the rest of the product was isolated by column chromatography on silica gel (eluent: hexane/dichloromethane = 5/1) as a mixture of isomers with ratio *meso/rac* = 2/1 (ca. 95% purity by NMR). Yield: 6.85 g (69%). **Rac-isomer:** <sup>1</sup>H NMR (400 MHz, CDCl<sub>3</sub>):  $\delta$  8.23 (d, *J* = 7.5 Hz, 4H), 7.66 (d, *J* = 7.7 Hz, 2H), 7.37–7.42 (m, 4H), 7.25–7.32 (m, 6H), 7.05 (d, *J* = 8.1 Hz, 2H), 6.97 (d, *J* = 8.1 Hz, 2H), 5.96 (s, 2H), 3.94 (s, 2H), 2.09 (s, 6H), 2.04 (s, 6H), -0.20 (s, 6H). **Meso-isomer:** <sup>1</sup>H NMR (400 MHz, CDCl<sub>3</sub>):  $\delta$  8.23 (d, *J* = 7.7 Hz, 4H), 7.50 (d, *J* = 7.7 Hz, 2H), 7.37–7.42 (m, 4H), 7.21–7.33 (m, 6H), 7.03 (m, 2H), 6.97 (m, 2H), 5.96 (s, 2H), 3.91 (s, 2H), 2.16 (s, 6H), 2.02 (s, 6H), -0.14 (s, 3H), -0.18 (s, 3H). <sup>13</sup>C{<sup>1</sup>H} NMR (100 MHz, CDCl<sub>3</sub>):  $\delta$  148.79, 148.77, 144.6, 144.5, 144.0, 143.9, 141.1, 140.9, 134.1, 134.0, 127.24, 127.17, 125.9, 125.8, 125.7, 124.3, 123.23, 123.21, 123.0, 122.9, 120.33, 120.25, 119.4, 119.3, 110.0, 109.7, 47.9, 47.8, 17.9, 17.8, 17.3, -6.1, -6.3, -6.5. HRMS (ESI) calc. for  $C_{48}H_{42}N_2NaSi^+$ : 697.3009 [M + Na]<sup>+</sup>; found: 697.3011.

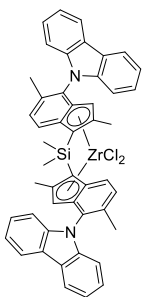

**Meso- and rac-dimethylsilanediybis[ $\eta^5$ -2,5-dimethyl-4-(9H-carbazol-9-yl)-1H-inden-1-yl]zirconium dichloride (C16).** General Method C was applied using 2.4 g (3.6 mmol) of bis[2,5-dimethyl-4-(9H-carbazol-9-yl)-1H-inden-1-yl]dimethylsilane (**L16**). Recrystallizations from toluene gave two crops of crystals: 800 mg of pure *rac*-isomer (27%) and 1.46 g *meso/rac* = 97/3 (49%). **Meso-C16:** <sup>1</sup>H NMR (400 MHz, CD<sub>2</sub>Cl<sub>2</sub>):  $\delta$  8.15 (m, 4H), 7.86 (m, 4H), 7.40 (m, 2H), 7.20–7.30 (m, 6H), 7.03 (d, *J* = 8.8 Hz, 2H), 6.53 (d, *J* = 7.3 Hz, 2H), 6.15 (s, 2H), 2.30 (s, 6H), 2.06 (s, 6H), 1.52 (s, 3H), 1.23 (s, 3H). **Rac-C16:** Anal. calc. for  $C_{48}H_{40}Cl_2N_2SiZr$ : C, 69.04; H, 4.83; N, 3.35. Found: C, 68.87; H, 4.90; N, 3.37. <sup>1</sup>H NMR (400 MHz, CD<sub>2</sub>Cl<sub>2</sub>):  $\delta$  8.15 (d, *J* = 7.5 Hz, 4H), 7.75 (m, 4H), 7.34 (m, 2H), 7.20–7.28 (m, 6H), 7.11–7.19 (m, 2H), 6.57 (m, 2H), 6.28 (s, 2H), 2.25 (s, 6H),

2.04 (s, 6H), 1.36 (s, 6H). <sup>13</sup>C{<sup>1</sup>H} NMR (100 MHz, CDCl<sub>3</sub>):  $\delta$  141.1, 140.7, 137.9, 136.5, 134.4, 130.8, 129.8, 126.54, 126.49, 126.3, 125.9, 124.0, 123.4, 120.7, 120.6, 120.3, 120.2, 120.1, 113.2, 110.5, 85.2, 19.0, 18.2, 2.4.

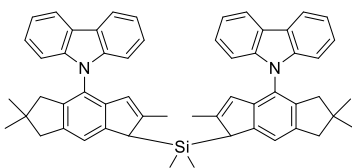

**Bis(4-(9H-carbazol-9-yl)-2,6,6-trimethyl-1,5,6,7-tetrahydro-s-indacen-1-yl)dimethylsilane (L17).** General Method A was applied using 7.3 g (20 mmol) of 9-(2,2,6-trimethyl-1,2,3,5-tetrahydro-s-indacen-4-yl)-9H-carbazole (**32**). Yield: 5.5 g (70%) as a mixture of two isomers with ratio 1/1 (ca. 96% purity by NMR).  $^1\text{H}$  NMR (400 MHz,  $\text{CDCl}_3$ ):  $\delta$  8.34 (m, 4H), 7.52–7.58 (m, 6H), 7.43 (m, 4H), 7.20–7.29 (m, 4H), 6.23 (m, 2H), 4.04 (m, 2H), 2.95–3.11 (m, 4H), 2.55–2.58 (m, 4H), 2.31 (s) and 2.23 (s) (sum 6H), 1.24–1.28 (m, 12H), 0.04 (s) and 0.03 (s) and 0.02 (s) (sum 6H).  $^{13}\text{C}\{^1\text{H}\}$  NMR (100 MHz,  $\text{CDCl}_3$ ):  $\delta$  147.16, 147.15, 145.24, 145.19, 141.85, 141.77, 140.9, 140.60, 140.57, 140.50, 140.0, 139.4, 139.3, 125.8, 125.7, 124.83, 124.76, 124.30, 124.28, 123.02, 122.97, 122.96, 120.30, 120.0, 119.30, 119.26, 110.2, 109.98, 109.97, 48.04, 47.95, 47.7, 47.6, 45.01, 44.99, 40.7, 28.62, 28.55, 28.52, 18.00, 17.9, -5.7, -6.0, -6.1. HRMS (ESI) calc. for  $\text{C}_{56}\text{H}_{54}\text{N}_2\text{NaSi}^+$ : 805.3948 [M + Na] $^+$ ; found: 805.3951.

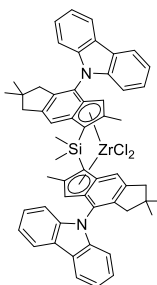

**Meso- and rac-dimethylsilanediylbis[ $\eta^5$ -2,2,6-trimethyl-4-(9H-carbazol-9-yl)-1,2,3,7-tetrahydro-s-indacen-7-yl]zirconium dichloride (C17).** General Method C was applied using 3.13 g (4.0 mmol) bis[2,2,6-trimethyl-4-(9H-carbazol-9-yl)-1,2,3,7-tetrahydro-s-indacen-7-yl]dimethylsilane (**L17**). Recrystallizations from toluene gave three crops of crystals: 1.50 g *rac/meso* = 1/9 (40%), 150 mg *rac/meso* = 1.0/5.7 (4%) and 1.10 g *rac/meso* = 2.3/1.0 (29%). The last crop of crystals was recrystallized several times from toluene/hexane mixture giving 130 mg *rac/meso* = 19/1 (3%). **Meso-C17**:  $^1\text{H}$  NMR (400 MHz,  $\text{CD}_2\text{Cl}_2$ ):  $\delta$  8.13 (m, 4H), 7.89 (m, 2H), 7.73 (s, 2H), 7.41 (m, 2H), 7.20–7.30 (m, 6H), 6.62 (m, 2H), 6.22 (s, 2H), 2.79 (m, 4H), 2.67 (d,  $J$  = 16.4 Hz, 2H), 2.31 (s, 6H), 2.19 (d,  $J$  = 16.6 Hz, 2H), 1.54 (s, 3H), 1.24 (s, 3H), 1.17 (s, 6H), 1.01 (s, 6H). **Rac-C17**: Anal. calc. for  $\text{C}_{56}\text{H}_{52}\text{Cl}_2\text{N}_2\text{SiZr}$ : C, 71.31; H, 5.56; N, 2.97. Found: C, 71.45; H, 5.68; N, 2.84.  $^1\text{H}$  NMR (400 MHz,  $\text{CD}_2\text{Cl}_2$ ):  $\delta$  8.12 (m, 4H), 7.76 (m, 2H), 7.60 (s, 2H), 7.31 (m, 2H), 7.22–7.28 (m, 6H), 6.56 (m, 2H), 6.36 (s, 2H), 2.66–2.79 (m, 6H), 2.7 (s, 6H), 2.10 (d,  $J$  = 16.5 Hz, 2H), 1.37 (s, 6H), 1.12 (s, 6H), 0.92 (s, 6H).  $^{13}\text{C}\{^1\text{H}\}$  NMR (100 MHz,  $\text{CD}_2\text{Cl}_2$ ):  $\delta$  144.1, 144.0, 140.7, 140.6, 136.7, 135.2, 129.2, 127.8, 126.5, 126.0, 124.2, 123.7, 122.1, 120.7, 120.4, 120.3, 120.2, 119.2, 113.7, 110.9, 48.0, 45.7, 41.1, 28.7, 28.3, 19.3, 3.1, 3.0.

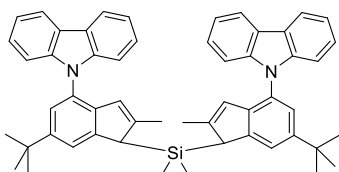

**Bis[2-methyl-4-(9H-carbazolyl)-6-tert-butyl-1H-indene-1-yl]dimethylsilane (L18).** General procedure A was applied using 10.0 g (28.45 mmol) of 9-(5-tert-butyl-2-methyl-1H-inden-7-yl)-9H-carbazole (**13**). Yield: 9.71 g (90%) of bis[2-methyl-4-(9H-carbazolyl)-6-tert-butyl-1H-indene-1-yl]dimethylsilane (ca. 95% purity by NMR, approx. 20:80 mixture of *rac*- and *meso*-isomers) as yellowish glassy solid which was further used without an additional purification.  $^1\text{H}$  NMR (400 MHz,  $\text{CDCl}_3$ ):  $\delta$  8.19 (d,  $J$  = 8.2 Hz, 4H), 7.59 (m) and 7.44–7.36 (m) and 7.32–7.26 (m) and 7.19–7.14 (m) (sum 16H), 6.18 (m, 2H), 3.94 (s) and 3.84 (s) (sum 2H), 2.20 (d,  $J$  = 1.0 Hz) and 2.17 (d,  $J$  = 1.0 Hz) (sum 6H), 1.41 (s) and 1.39 (s) (sum 18H), -0.06 (s) and -0.09 (s) and -0.14 (s) (sum 6H).  $^{13}\text{C}\{^1\text{H}\}$  NMR (100 MHz,  $\text{CDCl}_3$ ), *meso*-isomer:  $\delta$  147.7 (two resonances), 147.0, 141.4, 141.3, 139.9, 128.3, 125.83, 125.75, 124.4, 123.2 (two resonances), 121.9, 120.3, 120.2, 120.0, 119.52, 119.45, 110.24, 110.22, 48.0, 34.9, 31.8, 18.0, -5.2, -5.4. HRMS (ESI) calc. for  $\text{C}_{54}\text{H}_{54}\text{N}_2\text{NaSi}^+$ : 781.3948 [M + Na] $^+$ ; found: 781.3941.

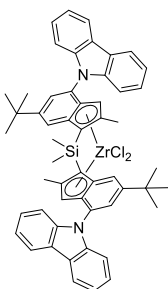

**Rac-dimethylsilanediylbis[ $\eta^5$ -2-methyl-4-(9H-carbazolyl)-6-tert-butyl-indene-1-yl]zirconium dichloride (C18).** General Method C was applied using 9.46 g (12.46 mmol) of bis[2-methyl-4-(9H-carbazolyl)-6-tert-butyl-1H-indene-1-yl]dimethylsilane (**L18**). Recrystallizations from toluene gave pure *rac*-isomer 5.2 g (45%). **Rac-C18**: Anal. calc. for  $\text{C}_{54}\text{H}_{52}\text{Cl}_2\text{N}_2\text{SiZr}$ : C, 70.56; H, 5.70; N, 3.05. Found: C, 70.81; H, 5.75; N, 2.94.  $^1\text{H}$  NMR (500 MHz,  $\text{CD}_2\text{Cl}_2$ ):  $\delta$  8.12 (m, 4H), 7.99 (d,  $J$  = 8.2 Hz, 2H), 7.76 (s, 2H), 7.73 (s, 2H), 7.23–7.34 (m, 8H), 6.89 (d,  $J$  = 8.2 Hz, 2H), 6.54 (s, 2H), 2.37 (s, 6H), 1.44 (s, 6H), 1.34 (s, 18H).  $^{13}\text{C}\{^1\text{H}\}$  NMR (126 MHz,  $\text{CD}_2\text{Cl}_2$ ):  $\delta$  149.3, 141.2, 141.0, 136.0, 134.0, 130.2, 129.4, 128.9, 126.6, 126.4, 125.8, 124.2, 124.0, 120.8, 120.5, 120.4, 120.2 (two signals), 112.9, 111.1, 84.44, 35.6, 30.9, 19.2,

2.8.

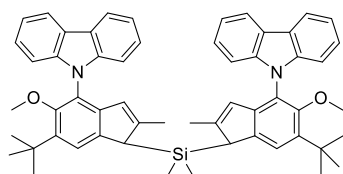

**Bis(6-(*tert*-butyl)-4-(9*H*-carbazol-9-yl)-5-methoxy-2-methyl-1*H*-inden-1-yl)dimethylsilanes (L19).** General Method B was applied using 7.0 g (18.4 mmol) of 9-(5-(*tert*-butyl)-6-methoxy-2-methyl-1*H*-inden-7-yl)-9*H*-carbazole (**33**). Yield: 6.5 g (87%) as a mixture of two isomers with ratio *meso*/*rac* = 2.6/1 (ca. 91% purity by NMR).  $^1\text{H}$  NMR (400 MHz,  $\text{CDCl}_3$ ):  $\delta$  8.19–8.22 (m, 4H), 7.39–7.54 (m, 10H), 7.08–7.21 (m, 4H), 5.97–6.01 (m, 2H), 3.83 (s) and 3.74 (s) (sum 2H), 2.92–3.01 (m, 6H), 2.11–2.15 (m, 6H), 1.48–1.51 (m, 18H), -0.08 (s) and -0.09 (s) and -0.15 (s) (sum 6H).  $^{13}\text{C}\{^1\text{H}\}$  NMR (100 MHz,  $\text{CDCl}_3$ , *meso*-isomer):  $\delta$  154.8, 148.7, 142.6, 140.6, 140.3, 140.0, 138.4, 125.94, 125.91, 124.4, 123.3, 123.1, 121.1, 121.0, 120.2, 120.0, 119.7, 119.6, 110.9, 110.3, 60.2, 47.7, 35.3, 30.9, 18.0, -5.4, -5.5.  $^{13}\text{C}\{^1\text{H}\}$  NMR (100 MHz,  $\text{CDCl}_3$ , *rac*-isomer, selected signals):  $\delta$  154.7, 148.4, 142.7, 140.5, 140.3, 139.9, 138.1, 125.9, 125.8, 123.7, 123.6, 123.2, 120.9, 120.8, 120.1, 120.0, 119.6, 110.4, 47.8, 35.2, 30.9, 17.6, -6.2. HRMS (ESI) calc. for  $\text{C}_{56}\text{H}_{58}\text{N}_2\text{NaO}_2\text{Si}^+$ : 841.4160 [M + Na] $^+$ ; found: 841.4159.

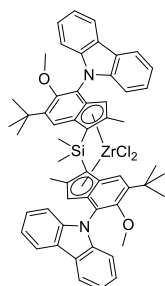

***Rac*- and *meso*-dimethylsilanediylbis[ $\eta^5$ -2-methyl-5-methoxy-4-(9*H*-carbazol-9-yl)-6-*tert*-butyl-1*H*-inden-1-yl]zirconium dichloride (C19).** General Method C was applied using 6.5 g (7.93 mmol) of bis[2-methyl-5-methoxy-4-(9*H*-carbazol-9-yl)-6-*tert*-butyl-1*H*-inden-1-yl]dimethylsilane (**L19**). Recrystallizations from toluene gave three crops of crystals: 1.7 g of pure *rac*-isomer (22%), another 700 mg of pure *rac*-isomer (9%), and 700 mg *rac*/*meso* = 11/1 (9%). ***Meso*-C19**:  $^1\text{H}$  NMR (400 MHz,  $\text{CDCl}_3$ ):  $\delta$  8.13–8.17 (m, 6H), 7.69 (s, 2H), 7.58 (m, 2H), 7.26–7.36 (m, 6H), 6.82 (d,  $J$  = 7.9 Hz, 2H), 6.29 (s, 2H), 3.18 (s, 6H), 2.29 (s, 6H), 1.51 (s, 18H), 1.49 (s, 3H), 1.18 (s, 3H). ***Rac*-C19**: Anal. calc. for  $\text{C}_{56}\text{H}_{56}\text{Cl}_2\text{N}_2\text{O}_2\text{SiZr}$ : C, 68.68; H, 5.76; N, 2.86. Found: C, 68.97; H, 5.84; N, 2.82.  $^1\text{H}$  NMR (400 MHz,  $\text{CD}_2\text{Cl}_2$ ):  $\delta$  8.17 (m, 4H), 8.11 (d,  $J$  = 8.3 Hz, 2H), 7.71 (s, 2H), 7.46 (m, 2H), 7.26–7.37 (m, 6H), 6.84 (d,  $J$  = 7.7 Hz, 2H), 6.31 (s, 2H), 3.21 (s, 6H), 2.23 (s, 6H), 1.46 (s, 18H), 1.36 (s, 6H).  $^{13}\text{C}\{^1\text{H}\}$  NMR (100 MHz,  $\text{CDCl}_3$ ):  $\delta$  160.9, 144.3, 140.7, 140.2, 136.2, 134.0, 126.5, 126.1, 124.2, 123.8, 123.5, 123.0, 121.8, 120.53, 120.48, 120.46, 120.1, 119.8, 114.2, 110.9, 83.1, 62.3, 36.3, 30.2, 18.9, 2.5.

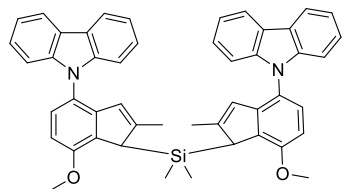

**Bis[2-methyl-4-(9*H*-carbazolyl)-7-methoxy-1*H*-indene-1-yl]dimethylsilane (L20).** General procedure A was applied using 6.2 g (19.05 mmol) of 9-(4-methoxy-2-methyl-1*H*-inden-4/7-yl)-9*H*-carbazole (**14**). Yield: 6.53 g (97%) (ca. 90% purity by NMR, approx. 1:1 mixture of *rac*- and *meso*-isomers) as yellowish glassy solid which was further used without an additional purification.  $^1\text{H}$  NMR (400 MHz,  $\text{CDCl}_3$ ):  $\delta$  8.22–8.13 (m, 4H), 7.43–7.34 (m, 4H), 7.34–7.17 (m, 8H), 7.15–7.08 (m, 2H), 6.87–6.81 (m, 2H), 6.02 (s, 2H), 4.41 (s) and 4.23 (s) (sum 2H), 3.99 (s) and 3.94 (s) (sum 6H), 2.18 (s) and 2.13 (s) (sum 6H), -0.19 (s) and -0.20 (s) and -0.29 (s) (sum 6H).  $^{13}\text{C}\{^1\text{H}\}$  NMR (100 MHz,  $\text{CDCl}_3$ ):  $\delta$  156.9, 156.8, 148.2, 148.0, 146.6, 147.0, 143.1, 142.4, 141.1, 140.7, 140.6, 130.4, 130.3, 125.4, 124.5, 124.0, 123.9, 122.9, 122.8, 121.3, 120.5, 117.5, 117.33, 117.29, 106.7, 106.5, 106.39, 106.33, 55.6, 54.8, 45.14, 45.08, 18.1, 17.8, -3.6, -3.7, -3.9. HRMS (ESI) calc. for  $\text{C}_{48}\text{H}_{42}\text{N}_2\text{NaO}_2\text{Si}^+$ : 729.2908 [M + Na] $^+$ ; found: 729.2909.

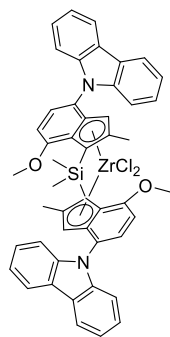

***Rac*- and *meso*-dimethylsilanediylbis[ $\eta^5$ -2-methyl-4-(9*H*-carbazolyl)-7-methoxy-indene-1-yl]zirconium dichloride (C20).** General Method C was applied using 6.53 g (9.24 mmol) of bis[2-methyl-4-(9*H*-carbazolyl)-7-methoxy-1*H*-indene-1-yl]dimethylsilane (**L20**). Recrystallizations from toluene gave a total 3.5 g (44%) of *rac*- and *meso*-**C20**. This crops of crystals were recrystallized several times giving 390 mg (5%) of pure *rac*-**C20** and 890 mg (11%) of pure *meso*-**C20**. ***Meso*-C20**: Anal. calc. for  $\text{C}_{48}\text{H}_{40}\text{Cl}_2\text{N}_2\text{O}_2\text{SiZr}$ : C, 66.49; H, 4.65; N, 3.23. Found: C, 66.62; H, 4.78; N, 3.11.  $^1\text{H}$  NMR (400 MHz,  $\text{CDCl}_3$ ):  $\delta$  8.09 (d,  $J$  = 7.9 Hz, 4H), 7.99 (d,  $J$  = 8.2 Hz, 2H), 7.41 (d,  $J$  = 8.0 Hz, 2H), 7.35 (t,  $J$  = 7.6 Hz, 2H), 7.29–7.14 (m, 6H), 6.74 (d,  $J$  = 7.3 Hz, 2H), 6.50 (s, 2H), 6.38 (d,  $J$  = 8.0 Hz, 2H), 3.98 (s, 6H), 2.42 (s, 6H), 1.40 (s, 3H), 1.25 (s, 3H).  $^{13}\text{C}\{^1\text{H}\}$  NMR (100 MHz,  $\text{CDCl}_3$ ):  $\delta$  157.4, 141.6, 141.4, 134.4, 128.4, 126.0, 125.7, 125.2, 123.7, 123.6, 123.2, 123.0, 122.4, 120.2, 119.8, 119.7, 119.4, 112.7, 110.1, 102.8, 85.8, 55.8, 19.4, 5.8, 5.7. ***Rac*-C20**: Anal. calc. for  $\text{C}_{48}\text{H}_{40}\text{Cl}_2\text{N}_2\text{O}_2\text{SiZr}$ : C, 66.49; H, 4.65; N, 3.23. Found: C, 66.54; H, 4.51; N, 3.20.  $^1\text{H}$  NMR (400 MHz,  $\text{CDCl}_3$ ):  $\delta$  8.11 (d,  $J$  = 7.8 Hz, 2H), 8.08 (d,  $J$  = 8.4 Hz, 2H), 7.90 (d,  $J$  = 8.2 Hz, 2H), 7.44 (d,  $J$  =

7.9 Hz, 2H), 7.31 (t,  $J = 7.6$  Hz, 2H), 7.28–7.14 (m, 6H), 6.79 (d,  $J = 7.4$  Hz, 2H), 6.58 (s, 2H), 6.42 (d,  $J = 8.0$  Hz, 2H), 3.91 (s, 6H), 2.22 (s, 6H), 1.24 (s, 6H).  $^{13}\text{C}\{^1\text{H}\}$  NMR (100 MHz,  $\text{CDCl}_3$ ):  $\delta$  155.9, 141.6, 141.4, 135.1, 133.2, 128.3, 126.6, 126.1, 125.2, 123.7, 123.2, 121.7, 120.2, 119.7, 119.6, 119.4, 112.6, 110.2, 103.0, 84.7, 54.3, 17.7, 5.7.

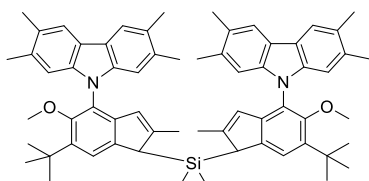

**Bis(6-(*tert*-butyl)-5-methoxy-2-methyl-4-(2,3,6,7-tetramethyl-9H-carbazol-9-yl)-1H-inden-1-yl)dimethylsilanes (L21).** General Method B was applied using 4.2 g (9.6 mmol) of 9-(5-(*tert*-butyl)-6-methoxy-2-methyl-1H-inden-7-yl)-9H-carbazole (**34**). Yield: 4.2 g (89%) as a mixture of two isomers with ratio *meso*/*rac* = 2/1 (ca. 93% purity by NMR).  $^1\text{H}$  NMR (400 MHz,  $\text{CDCl}_3$ ):  $\delta$  7.84–7.88 (m, 4H), 7.37–7.51 (m, 2H), 6.81–6.92 (m, 4H), 5.98 (m,

2H), 3.79 (s) and 3.74 (s) (sum 2H), 2.94–3.00 (m, 6H), 2.41–2.45 (m, 12H), 2.32–2.35 (m, 12H), 2.13 (s) and 2.09 (s) (sum 6H), 1.45–1.52 (m, 18H), -0.07 (s) and -0.11 (s) and -0.13 (s) (sum 6H).  $^{13}\text{C}\{^1\text{H}\}$  NMR (100 MHz,  $\text{CDCl}_3$ ):  $\delta$  156.5, 155.0, 154.7, 153.9, 148.4, 148.3, 145.5, 142.9, 142.5, 141.7, 140.5, 139.8, 139.8, 139.7, 139.6, 139.6, 139.5, 139.4, 139.2, 138.6, 138.2, 138.1, 137.6, 134.8, 134.3, 134.2, 134.2, 134.1, 134.1, 134.1, 128.0, 127.9, 127.9, 127.8, 127.7, 127.6, 125.8, 124.5, 123.7, 121.6, 121.6, 121.5, 121.4, 121.4, 121.4, 121.2, 121.2, 121.0, 120.9, 120.8, 120.6, 120.4, 120.4, 120.3, 120.3, 120.2, 119.4, 111.3, 111.3, 111.3, 111.1, 110.9, 110.9, 110.8, 77.3, 76.7, 60.6, 60.4, 60.3, 35.3, 35.3, 35.3, 34.9, 30.9, 30.8, 30.8, 30.6, 21.0, 21.0, 20.9, 20.9, 20.9, 20.1, -0.7, -4.5, -6.1. HRMS (ESI) calc. for  $\text{C}_{64}\text{H}_{74}\text{N}_2\text{NaO}_2\text{Si}^+$ : 953.5412 [M + Na] $^+$ ; found: 953.5407.

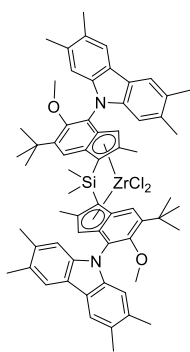

***Rac*- and *meso*-dimethylsilanediylbis[ $\eta^5$ -2-methyl-5-methoxy-4-(2,3,6,7-tetramethyl-9H-carbazol-9-yl)-6-*tert*-butyl-1H-inden-1-yl]zirconium dichloride (C21).** General Method C was applied using 4.2 g (8.51 mmol) of bis[2-methyl-5-methoxy-4-(2,3,6,7-tetramethyl-9H-carbazol-9-yl)-6-*tert*-butyl-1H-inden-1-yl]dimethylsilane (**L21**). Recrystallizations from toluene gave two crops of crystals: 1.1 g *rac*/*meso* = 2/1 (20%) and 360 mg *rac*/*meso* = 6/1 (7%). Several recrystallizations of the first crop of crystals from toluene gave 50 mg of *rac*/*meso* = 95/5 (0.9%). **Meso-C21**:  $^1\text{H}$  NMR (400 MHz,  $\text{CD}_2\text{Cl}_2$ ):  $\delta$  7.89 (s, 1H), 7.68 (s, 1H), 7.65 (s, 5H), 7.60 (s, 1H), 6.49 (s, 1H), 6.48 (s, 1H), 6.19 (s, 1H), 5.98 (s, 1H), 3.04 (s, 3H), 3.01 (s, 3H), 2.43 (s, 3H), 2.42 (s, 3H), 2.34–3.41 (m, 12H) 2.26 (s, 3H), 2.25 (s, 3H), 2.19 (s, 3H), 2.17 (s, 3H), 1.47 (s, 9H), 1.43 (s, 9H), 1.34 (s, 3H), 1.25 (s, 3H). **Rac-C21**: Anal. calc. for  $\text{C}_{64}\text{H}_{72}\text{Cl}_2\text{N}_2\text{O}_2\text{SiZr}$ : C, 70.43; H, 6.65; N, 2.57. Found: C, 70.58; H, 6.72; N, 2.66.  $^1\text{H}$  NMR (400

MHz,  $\text{CDCl}_3$ ):  $\delta$  7.86 (s, 2H), 7.82 (s, 4H), 7.63 (s, 2H), 6.60 (s, 2H), 6.42 (s, 2H), 3.28 (s, 6H), 2.42 (s, 6H), 2.41 (s, 6H), 2.40 (s, 6H), 2.28 (s, 6H), 2.18 (s, 6H), 1.44 (s, 18H), 1.31 (s, 6H).  $^{13}\text{C}$  NMR (100 MHz,  $\text{CDCl}_3$ ):  $\delta$  160.4, 143.7, 139.0, 138.3, 135.2, 135.1, 134.0, 133.9, 128.5, 128.3, 122.8, 121.8, 121.7, 121.5, 120.1, 119.9, 119.4, 133.6, 111.2, 81.9, 77.2, 62.5, 35.9, 29.9, 20.9, 20.8, 20.1, 20.0, 18.4, 2.3.

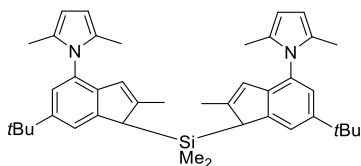

**Bis[2-methyl-4-(2,5-dimethylpyrrol-1-yl)-6-*tert*-butyl-1H-inden-1-yl]dimethylsilanes (L22).** General Method A was applied using 6.0 g (21.5 mmol) of 1-(5-(*tert*-butyl)-2-methyl-1H-inden-7-yl)-2,5-dimethyl-1H-pyrrole (**25**). Yield: 4.5 g (68%) as a mixture of two isomers with ratio *meso*/*rac* = 2/1 (ca. 91% purity by NMR). **Meso-isomer**:  $^1\text{H}$  NMR (400 MHz,  $\text{CDCl}_3$ ):  $\delta$  7.53 (s,

2H), 7.20 (s, 2H), 6.34 (s, 2H), 6.01 (s, 4H), 3.85 (s, 2H), 2.31 (s, 6H), 2.09 (s, 6H), 2.05 (s, 6H), 1.41 (s, 18H), -0.19 (s, 3H), -0.28 (s, 3H). **Rac-isomer**:  $^1\text{H}$  NMR (400 MHz,  $\text{CDCl}_3$ ):  $\delta$  7.70 (s, 2H), 7.20 (s, 2H), 6.34 (s, 2H), 6.01 (s, 4H), 3.94 (s, 2H), 2.28 (s, 6H), 2.10 (s, 6H), 2.05 (s, 6H), 1.42 (s, 18H), -0.26 (s, 6H).  $^{13}\text{C}\{^1\text{H}\}$  NMR (100 MHz, two isomers *meso*\*/*rac* $^\circ = 2/1$ ,  $\text{CDCl}_3$ ):  $\delta$  147.8\*, 147.7°, 149.0°, 146.9\*, 145.8\*, 145.7°, 140.7°. 140.6\*, 129.9, 129.01°, 128.99\*, 128.9, 123.8°, 123.8\*, 122.5\*, 122.4°, 119.6, 105.1, 105.0, 47.83°, 47.8\*, 34.7, 31.6, 18.0, 12.87, 12.84, 12.82, -5.9, -6.3, -6.8. HRMS (ESI) calc. for  $\text{C}_{42}\text{H}_{54}\text{N}_2\text{NaSi}^+$ : 637.3948 [M + Na] $^+$ ; found: 637.3952.

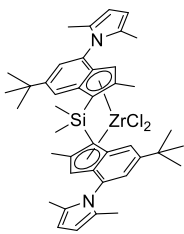

**Rac-dimethylsilanediylbis[ $\eta^5$ -2-methyl-4-(2,5-dimethyl-1H-pyrrol-1-yl)-6-tert-butyl-1H-inden-1-yl]zirconium dichloride (C22).** General Method C was applied using 2.5 g (4.06 mmol) of bis[2-methyl-4-(2,5-dimethyl-1H-pyrrol-1-yl)-1H-inden-1-yl]dimethylsilane (**L22**). Recrystallizations from toluene/hexane mixture gave two crops of crystals of pure *rac*-**C22** 1.13 g (36%). **Rac-C22**: Anal. calc. for C<sub>42</sub>H<sub>52</sub>Cl<sub>2</sub>N<sub>2</sub>SiZr: C, 65.08; H, 6.76; N, 3.61. Found: C, 64.99; H, 6.88; N, 3.70. <sup>1</sup>H NMR (400 MHz, CD<sub>2</sub>Cl<sub>2</sub>):  $\delta$  7.63 (s, 2H), 7.33 (m, 2H), 6.49 (s, 2H), 5.83 (m, 4H), 2.35 (s, 6H), 2.28 (s, 6H), 1.70 (s, 6H), 1.33 (s, 6H), 1.32 (s, 18H). <sup>13</sup>C NMR (100 MHz, CD<sub>2</sub>Cl<sub>2</sub>):  $\delta$  149.1, 136.3, 135.1, 132.8, 131.0, 129.7, 128.0, 127.9, 121.5, 120.6, 107.1, 106.9, 84.3, 35.7, 31.0, 19.3, 14.5, 13.3, 2.8.



## SMALL SCALE PROPYLENE POLYMERIZATION EXPERIMENTS

Propylene homopolymerizations were performed in a parallel pressure reactor setup with 48 reaction cells (PPR48), fully contained in glovebox under nitrogen. A pre-weighed glass vial (5.0 mL working volume) feature insert and disposable stirring paddle were fitted to each reaction vessel of the reactor.

For experiments with activation by MAO, toluene (solvent unless stated otherwise), a solution of MAO in toluene (500 equiv), and liquid propylene (1.0 mL) were added via syringe. The reactor was then heated to process temperature (70 °C or 100 °C) while stirring at 800 RPM. A precatalyst solution (in toluene) was then added via syringe to the reactor at process conditions. The total amount of solvent added to the reactor, including that used for MAO and precatalysts solutions was 4.1 ml. For experiments with activation by AB, isohexane and liquid propylene (1.0 mL) were added via syringe, and the reactor was then heated to process temperature (70 °C or 100 °C) while stirring at 800 RPM. Solutions of scavenger ((n-octyl)<sub>3</sub>Al in isohexane), AB (1.1. equiv, in toluene), and, finally, precatalyst (in toluene) were then added via syringe to the reactor at process conditions. The total amount of isohexane added to the reactor including that used for the scavenger solution was 3.8 ml. The total amount of toluene added to the reactor from precatalyst and AB solutions was 0.2 ml.

Reactor temperature was monitored and typically maintained within  $\pm 1^\circ\text{C}$ . Polymerizations were halted by addition of approximately 50 psi O<sub>2</sub>/Ar (5 mol% O<sub>2</sub>) gas mixture to the reactors for approximately 30 seconds. The polymerizations were quenched based on a predetermined pressure loss of approximately 8 psi or for a maximum of 30 minutes polymerization time.

After the polymerization reaction, the volatile components were removed from the glass vial insert containing the polymer using a Genevac HT-12 centrifuge and Genevac VC3000D vacuum evaporator. The vial was then weighed to determine the yield of the polymer product. The molecular weight distribution of the resultant polymer was analyzed by Rapid GPC (3 $\times$ PLgel Mix B, 10  $\mu\text{m}$ , 30 cm $\times$ 7.5 mm; eluent: 1,2,4-trichlorobenzene at flow rate of 2.0 mL/min; oven temperature: 165 °C) with evaporative light scattering detector, calibrated using polystyrene standards ranging from 580 Da – 3390 kDa (relative calibration). The polymer samples were dissolved in 1,2,4-trichlorobenzene at a concentration of 0.1 mg/mL - 0.9 mg/mL. 250  $\mu\text{L}$  of a polymer solution was injected into the system. Differential Scanning Calorimetry (DSC) measurements were performed on a TA-Q100 instrument to determine the melting point of the polymers. Samples were pre-annealed at 220 °C for 15 minutes and then allowed to cool to room temperature overnight. The samples were then heated to 220 °C at a rate of 100 °C/min and then cooled at a rate of 50 °C/min. Melting points were collected during the heating period. The polymers were also characterized by quantitative <sup>13</sup>C NMR at a frequency of 150 MHz with a Bruker 600 MHz spectrometer at 120 °C equipped with a high-temperature cryoprobe (for 10 mm O.D. tubes) and a preheated robotic sample changer. Samples were dissolved in deuterated tetrachloroethane at a concentration of 67 mg/mL at 140 °C. Polymer resonance peaks are referenced to mmmm=21.8 ppm. Calculations involved in the characterization of polymers by NMR follow the work of F. A. Bovey in "Polymer Conformation and Configuration" Academic Press, New York 1969 and J. Randall in "Polymer Sequence Determination, Carbon-13 NMR Method", Academic Press, New York, 1977. Methods for measuring relative contents of 2,1-regioerrors and 1,3- regioerrors follow standard methods. Additional references include Grassi, A. et. al. *Macromolecules*, **1988**, *21*, 617-622 and Busico et.al. *Macromolecules*, **1994**, *27*, 7538-7543. The intensities used in the calculations are normalized to the total number of monomers in the sample.

**Table S1. Propylene polymerization experiments using activation by MAO<sup>a</sup>**

| Pre-cat.        | $n_{\text{precat.}}$ , $\mu\text{mol}^b$ | $T_p$ , °C <sup>c</sup> | Quench time, s <sup>d</sup> | Polymer yield, g | Activity, $\frac{g_{\text{polym.}}}{(\text{mmol}_{\text{cat}} \cdot \text{h})^{-1}}$ | $M_n$ , Da | $M_w$ , Da | PDI <sup>e</sup> | Polymer $T_m$ , °C <sup>f</sup> |
|-----------------|------------------------------------------|-------------------------|-----------------------------|------------------|--------------------------------------------------------------------------------------|------------|------------|------------------|---------------------------------|
| C1 <sup>g</sup> | 0.080                                    | 70                      | 1803                        | 0.1148           | 2865                                                                                 | 33617      | 47351      | 1.4              | 137.8                           |
| C1 <sup>g</sup> | 0.080                                    | 70                      | 1800                        | 0.1007           | 2517                                                                                 | 32463      | 47856      | 1.5              | 137.6                           |
| C1 <sup>g</sup> | 0.080                                    | 70                      | 1801                        | 0.1219           | 3046                                                                                 | 28737      | 47792      | 1.7              | 137.8                           |
| C1 <sup>g</sup> | 0.080                                    | 100                     | 1801                        | 0.1070           | 2673                                                                                 | 6951       | 9624       | 1.4              | –                               |
| C1 <sup>g</sup> | 0.080                                    | 100                     | 1531                        | 0.1339           | 3936                                                                                 | 8588       | 12282      | 1.4              | 106.5                           |
| C1 <sup>g</sup> | 0.080                                    | 100                     | 1714                        | 0.1287           | 3380                                                                                 | 7998       | 11347      | 1.4              | 104.0                           |
| C2              | 0.040                                    | 70                      | 206                         | 0.1619           | 70733                                                                                | 364910     | 582590     | 1.6              | 159.1                           |
| C2              | 0.040                                    | 70                      | 223                         | 0.159            | 64170                                                                                | 339884     | 587090     | 1.7              | 158.1                           |
| C2              | 0.040                                    | 70                      | 239                         | 0.1888           | 71096                                                                                | 389961     | 635984     | 1.6              | 157.0                           |
| C2              | 0.040                                    | 100                     | 173                         | 0.1052           | 54728                                                                                | 161525     | 251506     | 1.6              | 155.5                           |
| C2              | 0.040                                    | 100                     | 166                         | 0.1076           | 58337                                                                                | 141860     | 230783     | 1.6              | 154.8                           |
| C2              | 0.040                                    | 100                     | 190                         | 0.0922           | 43674                                                                                | 162431     | 260787     | 1.6              | 155.3                           |
| C3              | 0.040                                    | 70                      | 544                         | 0.0996           | 16478                                                                                | 131456     | 207027     | 1.6              | 155.3                           |
| C3              | 0.040                                    | 70                      | 463                         | 0.0862           | 16756                                                                                | 127240     | 202604     | 1.6              | 155.3                           |
| C3              | 0.040                                    | 70                      | 467                         | 0.0867           | 16709                                                                                | 134851     | 215475     | 1.6              | 155.7                           |
| C3              | 0.040                                    | 100                     | 730                         | 0.0568           | 7003                                                                                 | 26400      | 46636      | 1.8              | 146.8                           |
| C3              | 0.040                                    | 100                     | 618                         | 0.0607           | 8840                                                                                 | 30244      | 57725      | 1.9              | 147.2                           |
| C3              | 0.040                                    | 100                     | 618                         | 0.0599           | 8723                                                                                 | 30702      | 50586      | 1.7              | 147.2                           |
| C4              | 0.040                                    | 70                      | 301                         | 0.1191           | 35611                                                                                | 611907     | 996618     | 1.6              | 159.3                           |
| C4              | 0.040                                    | 70                      | 291                         | 0.1312           | 40577                                                                                | 537152     | 887953     | 1.7              | 160.1                           |
| C4              | 0.040                                    | 70                      | 321                         | 0.1303           | 36533                                                                                | 609758     | 987409     | 1.6              | 159.0                           |
| C4              | 0.040                                    | 100                     | 363                         | 0.0568           | 14083                                                                                | 183768     | 298941     | 1.6              | 153.8                           |
| C4              | 0.040                                    | 100                     | 302                         | 0.0614           | 18298                                                                                | 184750     | 291086     | 1.6              | 155.7                           |
| C4              | 0.040                                    | 100                     | 402                         | 0.0662           | 14821                                                                                | 200262     | 301200     | 1.5              | 155.3                           |
| C6              | 0.040                                    | 70                      | 126                         | 0.2896           | 206857                                                                               | 175309     | 379050     | 2.2              | 157.5                           |
| C6              | 0.040                                    | 70                      | 158                         | 0.3454           | 196747                                                                               | 151341     | 357856     | 2.4              | 156.9                           |
| C6              | 0.040                                    | 100                     | 122                         | 0.1016           | 74951                                                                                | 122163     | 210179     | 1.7              | 154.8                           |
| C6              | 0.040                                    | 100                     | 103                         | 0.1194           | 104330                                                                               | 121323     | 196122     | 1.6              | 154.7                           |
| C6              | 0.040                                    | 100                     | 113                         | 0.1088           | 86655                                                                                | 108328     | 187624     | 1.7              | 154.3                           |
| M6              | 0.040                                    | 70                      | 128                         | 0.3538           | 248766                                                                               | 164348     | 364099     | 2.2              | 158.4                           |
| M6              | 0.040                                    | 70                      | 101                         | 0.3146           | 280337                                                                               | 137866     | 332993     | 2.4              | 156.9                           |
| M6              | 0.040                                    | 70                      | 143                         | 0.4009           | 252315                                                                               | 131083     | 296135     | 2.3              | 156.1                           |
| M6              | 0.040                                    | 100                     | 98                          | 0.1004           | 92204                                                                                | 122216     | 206290     | 1.7              | 153.6                           |
| M6              | 0.040                                    | 100                     | 94                          | 0.1253           | 119968                                                                               | 95085      | 171135     | 1.8              | 154.3                           |
| M6              | 0.040                                    | 100                     | 87                          | 0.1188           | 122897                                                                               | 107121     | 180409     | 1.7              | 154.4                           |
| M7              | 0.040                                    | 70                      | 206                         | 0.4033           | 176199                                                                               | 193807     | 470190     | 2.4              | 156.9                           |
| M7              | 0.040                                    | 70                      | 196                         | 0.3789           | 173985                                                                               | 219666     | 442422     | 2.0              | 156.7                           |
| M7              | 0.040                                    | 70                      | 212                         | 0.4092           | 173717                                                                               | 160750     | 448899     | 2.8              | 156.9                           |
| M7              | 0.040                                    | 100                     | 157                         | 0.1101           | 63115                                                                                | 152430     | 259991     | 1.7              | 154.2                           |
| M7              | 0.040                                    | 100                     | 142                         | 0.1242           | 78718                                                                                | 126811     | 259099     | 2.0              | 154.1                           |
| M7              | 0.040                                    | 100                     | 137                         | 0.1126           | 73971                                                                                | 130406     | 236174     | 1.8              | 154.1                           |
| M8              | 0.040                                    | 70                      | 206                         | 0.3065           | 133908                                                                               | 290481     | 557688     | 1.9              | 159.0                           |
| M8              | 0.040                                    | 70                      | 211                         | 0.3810           | 162512                                                                               | 264195     | 556538     | 2.1              | 159.6                           |
| M8              | 0.040                                    | 70                      | 229                         | 0.4308           | 169310                                                                               | 247337     | 578307     | 2.3              | 158.9                           |
| M8              | 0.040                                    | 100                     | 127                         | 0.1247           | 88370                                                                                | 210342     | 351757     | 1.7              | 154.6                           |

|                        |       |     |     |        |        |        |         |     |       |
|------------------------|-------|-----|-----|--------|--------|--------|---------|-----|-------|
| <b>M8</b>              | 0.040 | 100 | 121 | 0.1176 | 87471  | 214758 | 352169  | 1.6 | 155.1 |
| <b>M8</b>              | 0.040 | 100 | 133 | 0.1354 | 91624  | 200963 | 352483  | 1.8 | 155.8 |
| <b>C10</b>             | 0.040 | 70  | 191 | 0.2200 | 103665 | 273731 | 601956  | 2.2 | 158.0 |
| <b>C10</b>             | 0.040 | 70  | 217 | 0.2406 | 99788  | 317013 | 642596  | 2.0 | 157.5 |
| <b>C10</b>             | 0.040 | 70  | 227 | 0.2640 | 104670 | 274565 | 621226  | 2.3 | 158.5 |
| <b>C10</b>             | 0.040 | 100 | 109 | 0.1320 | 108991 | 156433 | 282874  | 1.8 | 154.1 |
| <b>C10</b>             | 0.040 | 100 | 129 | 0.1187 | 82814  | 144912 | 287040  | 2.0 | 154.2 |
| <b>C10</b>             | 0.040 | 100 | 118 | 0.1342 | 102356 | 117621 | 239544  | 2.0 | 154.1 |
| <b>C11</b>             | 0.025 | 70  | 589 | 0.0822 | 20100  | 690367 | 1006410 | 1.5 | 159.3 |
| <b>C11</b>             | 0.025 | 70  | 560 | 0.0851 | 21871  | 712331 | 1037112 | 1.5 | 158.9 |
| <b>C11</b>             | 0.025 | 70  | 679 | 0.0775 | 16426  | 764627 | 1109846 | 1.5 | 159.3 |
| <b>C11</b>             | 0.025 | 100 | 345 | 0.0579 | 24167  | 210674 | 299462  | 1.4 | 154.8 |
| <b>C11</b>             | 0.025 | 100 | 242 | 0.0596 | 35421  | 200709 | 283720  | 1.4 | 155.3 |
| <b>C11</b>             | 0.025 | 100 | 381 | 0.0571 | 21604  | 214150 | 304386  | 1.4 | 155.1 |
| <b>C12</b>             | 0.040 | 70  | 194 | 0.1070 | 49639  | 358019 | 626823  | 1.8 | 158.1 |
| <b>C12</b>             | 0.040 | 70  | 230 | 0.1008 | 39443  | 411602 | 674791  | 1.6 | 156.2 |
| <b>C12</b>             | 0.040 | 70  | 222 | 0.1083 | 43905  | 353411 | 633179  | 1.8 | 156.4 |
| <b>C12</b>             | 0.040 | 100 | 703 | 0.0701 | 8974   | 137400 | 260959  | 1.9 | 152.4 |
| <b>C12</b>             | 0.040 | 100 | 849 | 0.0703 | 7452   | 185274 | 293044  | 1.6 | 152.1 |
| <b>C12</b>             | 0.040 | 100 | 673 | 0.0667 | 8920   | 142732 | 255483  | 1.8 | 152.0 |
| <b>C15</b>             | 0.040 | 70  | 179 | 0.3934 | 197799 | 242840 | 597240  | 2.5 | 157.2 |
| <b>C15</b>             | 0.040 | 70  | 211 | 0.4510 | 192370 | 224765 | 596222  | 2.7 | 155.5 |
| <b>C15</b>             | 0.040 | 70  | 200 | 0.4038 | 181710 | 219357 | 619049  | 2.8 | 156.4 |
| <b>C15</b>             | 0.040 | 100 | 75  | 0.1638 | 196560 | 169353 | 303072  | 1.8 | 154.1 |
| <b>C15</b>             | 0.040 | 100 | 77  | 0.1693 | 197883 | 155749 | 286350  | 1.8 | 154.5 |
| <b>C15</b>             | 0.040 | 100 | 73  | 0.1687 | 207986 | 155993 | 281972  | 1.8 | 154.2 |
| <b>C16</b>             | 0.040 | 70  | 245 | 0.1434 | 52678  | 305124 | 547470  | 1.8 | 156.2 |
| <b>C16</b>             | 0.040 | 70  | 268 | 0.1535 | 51549  | 312922 | 572393  | 1.8 | 155.9 |
| <b>C16</b>             | 0.040 | 70  | 285 | 0.1522 | 48063  | 368277 | 602371  | 1.6 | 156.4 |
| <b>C16</b>             | 0.040 | 100 | 136 | 0.1125 | 74449  | 112735 | 197001  | 1.8 | 155.6 |
| <b>C16</b>             | 0.040 | 100 | 146 | 0.1174 | 72370  | 111956 | 195609  | 1.8 | 154.5 |
| <b>C16</b>             | 0.040 | 100 | 145 | 0.1051 | 65234  | 107036 | 181965  | 1.7 | 155.1 |
| <b>C17</b>             | 0.040 | 70  | 168 | 0.2369 | 127054 | 304412 | 534018  | 1.8 | 157.0 |
| <b>C17</b>             | 0.040 | 70  | 188 | 0.2756 | 131600 | 257807 | 504182  | 2.0 | 160.5 |
| <b>C17</b>             | 0.040 | 70  | 214 | 0.3062 | 128860 | 262707 | 488444  | 1.9 | 157.3 |
| <b>C17</b>             | 0.040 | 100 | 89  | 0.1636 | 166129 | 113801 | 215443  | 1.9 | 155.2 |
| <b>C17</b>             | 0.040 | 100 | 98  | 0.1629 | 149862 | 111039 | 221830  | 2.0 | 155.0 |
| <b>C17</b>             | 0.040 | 100 | 69  | 0.1322 | 171219 | 120414 | 215888  | 1.8 | 154.5 |
| <b>C18<sup>g</sup></b> | 0.080 | 70  | 295 | 0.4009 | 61134  | 259208 | 628955  | 2.4 | 154.5 |
| <b>C18<sup>g</sup></b> | 0.080 | 70  | 335 | 0.4036 | 54280  | 274508 | 621246  | 2.3 | 153.6 |
| <b>C18<sup>g</sup></b> | 0.080 | 70  | 314 | 0.4104 | 58797  | 255989 | 617466  | 2.4 | 155.3 |
| <b>C18<sup>g</sup></b> | 0.080 | 100 | 146 | 0.2317 | 71660  | 169442 | 322297  | 1.9 | 152.9 |
| <b>C18<sup>g</sup></b> | 0.080 | 100 | 155 | 0.2188 | 63359  | 163185 | 311443  | 1.9 | 152.2 |
| <b>C18<sup>g</sup></b> | 0.080 | 100 | 157 | 0.2080 | 59732  | 165055 | 319490  | 1.9 | 152.4 |
| <b>C19</b>             | 0.040 | 70  | 509 | 0.2700 | 47741  | 534240 | 981185  | 1.8 | 154.5 |
| <b>C19</b>             | 0.040 | 70  | 587 | 0.3662 | 56147  | 465831 | 861875  | 1.9 | 156.6 |
| <b>C19</b>             | 0.040 | 70  | 586 | 0.3560 | 54676  | 446926 | 886700  | 2.0 | 160.9 |
| <b>C19</b>             | 0.040 | 100 | 207 | 0.1124 | 48870  | 291391 | 493383  | 1.7 | 153.1 |
| <b>C19</b>             | 0.040 | 100 | 221 | 0.1147 | 46710  | 288441 | 496738  | 1.7 | 153.6 |
| <b>C20</b>             | 0.040 | 70  | 223 | 0.1648 | 66511  | 226401 | 406188  | 1.8 | 158.7 |

|             |       |     |      |        |        |        |         |     |       |
|-------------|-------|-----|------|--------|--------|--------|---------|-----|-------|
| <b>C20</b>  | 0.040 | 70  | 218  | 0.1648 | 68037  | 203737 | 369114  | 1.8 | 158.5 |
| <b>C20</b>  | 0.040 | 70  | 224  | 0.15   | 60268  | 244496 | 426686  | 1.8 | 158.3 |
| <b>C20</b>  | 0.040 | 100 | 154  | 0.1022 | 59727  | 48805  | 91197   | 1.9 | 156.3 |
| <b>C20</b>  | 0.040 | 100 | 142  | 0.1221 | 77387  | 46995  | 87097   | 1.9 | 156.0 |
| <b>C20</b>  | 0.040 | 100 | 141  | 0.1179 | 75255  | 68085  | 107861  | 1.6 | 156.8 |
| <b>C21</b>  | 0.040 | 70  | 689  | 0.1045 | 13650  | 723406 | 1243650 | 1.7 | 149.9 |
| <b>C21</b>  | 0.040 | 70  | 782  | 0.0918 | 10565  | 695698 | 1247608 | 1.8 | 152.2 |
| <b>C21</b>  | 0.040 | 70  | 791  | 0.0953 | 10843  | 765754 | 1290173 | 1.7 | 152.2 |
| <b>C21</b>  | 0.040 | 100 | 232  | 0.1207 | 46823  | 296479 | 497244  | 1.7 | 151.1 |
| <b>C21</b>  | 0.040 | 100 | 229  | 0.1195 | 46965  | 276404 | 466856  | 1.7 | 150.9 |
| <b>C21</b>  | 0.040 | 100 | 210  | 0.0989 | 42386  | 262328 | 467414  | 1.8 | 150.4 |
| <b>C22</b>  | 0.060 | 70  | 1365 | 0.0762 | 3351   | 382048 | 652540  | 1.7 | 149.8 |
| <b>C22</b>  | 0.060 | 70  | 1501 | 0.0731 | 2923   | 333230 | 672684  | 2.0 | 150.0 |
| <b>C22</b>  | 0.060 | 70  | 1572 | 0.0801 | 3056   | 377410 | 700284  | 1.9 | 150.3 |
| <b>C22</b>  | 0.060 | 100 | 422  | 0.0811 | 11532  | 70604  | 134480  | 1.9 | 147.9 |
| <b>C22</b>  | 0.060 | 100 | 437  | 0.0750 | 10301  | 68252  | 128781  | 1.9 | 147.8 |
| <b>C22</b>  | 0.060 | 100 | 411  | 0.0766 | 11188  | 67031  | 121033  | 1.8 | 147.6 |
| <b>M12</b>  | 0.040 | 70  | 123  | 0.1475 | 107927 | 304955 | 507079  | 1.7 | 157.4 |
| <b>M12</b>  | 0.040 | 70  | 107  | 0.1381 | 116159 | 298495 | 503604  | 1.7 | 157.5 |
| <b>M12</b>  | 0.040 | 70  | 114  | 0.1482 | 117000 | 303610 | 504912  | 1.7 | 157.9 |
| <b>M12</b>  | 0.040 | 100 | 912  | 0.068  | 6711   | 156757 | 272990  | 1.7 | 154.0 |
| <b>M12</b>  | 0.040 | 100 | 897  | 0.0693 | 6953   | 174165 | 283058  | 1.6 | 152.6 |
| <b>M12</b>  | 0.040 | 100 | 1015 | 0.0698 | 6189   | 156659 | 268270  | 1.7 | 153.3 |
| <b>M13</b>  | 0.040 | 70  | 791  | 0.0735 | 8363   | 261908 | 457877  | 1.8 | 153.9 |
| <b>M13</b>  | 0.040 | 70  | 851  | 0.0752 | 7953   | 306602 | 495805  | 1.6 | 153.6 |
| <b>M13</b>  | 0.040 | 70  | 965  | 0.0770 | 7181   | 315156 | 510222  | 1.6 | 154.3 |
| <b>M13</b>  | 0.040 | 100 | 522  | 0.0663 | 11431  | 62507  | 100561  | 1.6 | 151.1 |
| <b>M13</b>  | 0.040 | 100 | 548  | 0.0615 | 10100  | 54189  | 95646   | 1.8 | 150.6 |
| <b>M13</b>  | 0.040 | 100 | 527  | 0.0603 | 10298  | 56147  | 94374   | 1.7 | 150.3 |
| <b>M-II</b> | 0.040 | 70  | 188  | 0.3404 | 162957 | 298482 | 630605  | 2.1 | 159.6 |
| <b>M-II</b> | 0.040 | 70  | 256  | 0.449  | 157852 | 224554 | 560175  | 2.5 | 159.5 |
| <b>M-II</b> | 0.040 | 70  | 234  | 0.4033 | 155115 | 203125 | 534216  | 2.6 | 158.1 |
| <b>M-II</b> | 0.040 | 100 | 123  | 0.1486 | 108732 | 166877 | 308565  | 1.9 | 157.7 |
| <b>M-II</b> | 0.040 | 100 | 114  | 0.1373 | 108395 | 166844 | 307246  | 1.8 | 156.3 |
| <b>M-II</b> | 0.040 | 100 | 115  | 0.1392 | 108939 | 163385 | 298673  | 1.8 | 156.3 |

<sup>a</sup> Polymerization conditions: 500 eq. MAO, 4.1 mL toluene (except for **C1**, **C18**), 1.0 mL propylene, reactor quenched at 8 psig pressure loss (except for **C1**, **C18**) or at a maximum time limit of 30 minutes. <sup>b</sup> Precatalyst amount. <sup>c</sup> Polymerization temperature. <sup>d</sup> Polymerization time. <sup>e</sup> Polydispersity index,  $M_w/M_n$ , determined by GPC. <sup>f</sup> Polymer melting temperature, determined by DSC. <sup>g</sup> Solvent: 0.5 mL toluene, 3.6 mL isohexane; reactor quenched at 20 psig pressure loss.

**Table S2. Propylene polymerization experiments using activation by AB<sup>a</sup>**

| Pre-cat.  | $\eta_{\text{precat.}}$ , $\mu\text{mol}^b$ | $T_p$ , °C <sup>c</sup> | Quench time, s <sup>d</sup> | Polymer yield, g | Activity, $\text{g}_{\text{polym.}} \cdot (\text{mmol}_{\text{cat.}} \cdot \text{h})^{-1}$ | $M_n$ , Da | $M_w$ , Da | PDI <sup>e</sup> | Polymer $T_m$ , °C <sup>f</sup> |
|-----------|---------------------------------------------|-------------------------|-----------------------------|------------------|--------------------------------------------------------------------------------------------|------------|------------|------------------|---------------------------------|
| <b>M5</b> | 0.025                                       | 70                      | 404                         | 0.1962           | 69933                                                                                      | 418611     | 780751     | 1.9              | 160.9                           |
| <b>M5</b> | 0.025                                       | 70                      | 236                         | 0.1194           | 72854                                                                                      | 480047     | 879151     | 1.8              | 161.4                           |
| <b>M5</b> | 0.025                                       | 70                      | 244                         | 0.149            | 87934                                                                                      | 526800     | 940066     | 1.8              | 160.9                           |

|             |       |     |     |        |        |        |        |     |       |
|-------------|-------|-----|-----|--------|--------|--------|--------|-----|-------|
| <b>M5</b>   | 0.025 | 100 | 183 | 0.0698 | 54925  | 131092 | 234315 | 1.8 | 156.6 |
| <b>M5</b>   | 0.025 | 100 | 134 | 0.1242 | 133469 | 112809 | 205078 | 1.8 | 156.8 |
| <b>M6</b>   | 0.025 | 70  | 122 | 0.4056 | 478741 | 97082  | 352143 | 3.6 | 155.8 |
| <b>M6</b>   | 0.025 | 70  | 125 | 0.3886 | 447667 | 152418 | 386844 | 2.5 | 155.8 |
| <b>M6</b>   | 0.025 | 70  | 143 | 0.4282 | 431194 | 102713 | 358561 | 3.5 | 156.7 |
| <b>M6</b>   | 0.025 | 100 | 56  | 0.2056 | 528686 | 61919  | 129475 | 2.1 | 154.4 |
| <b>M6</b>   | 0.025 | 100 | 64  | 0.2506 | 563850 | 56257  | 130513 | 2.3 | 153.9 |
| <b>M6</b>   | 0.025 | 100 | 57  | 0.2319 | 585853 | 62728  | 130531 | 2.1 | 154.4 |
| <b>M7</b>   | 0.025 | 70  | 417 | 0.233  | 80460  | 437171 | 827871 | 1.9 | 159.9 |
| <b>M7</b>   | 0.025 | 70  | 359 | 0.2837 | 113796 | 425692 | 801495 | 1.9 | 159.4 |
| <b>M7</b>   | 0.025 | 70  | 287 | 0.2117 | 106219 | 532181 | 878142 | 1.7 | 159.8 |
| <b>M7</b>   | 0.025 | 70  | 321 | 0.2614 | 117264 | 401557 | 810902 | 2.0 | 159.1 |
| <b>M7</b>   | 0.025 | 100 | 144 | 0.1268 | 126800 | 116670 | 221808 | 1.9 | 155.5 |
| <b>M7</b>   | 0.025 | 100 | 196 | 0.1039 | 76335  | 127758 | 241243 | 1.9 | 156.4 |
| <b>M7</b>   | 0.025 | 100 | 201 | 0.1033 | 74006  | 134591 | 223403 | 1.7 | 156.5 |
| <b>M7</b>   | 0.025 | 100 | 115 | 0.1552 | 194337 | 108573 | 199937 | 1.8 | 155.8 |
| <b>M7</b>   | 0.025 | 100 | 140 | 0.1421 | 146160 | 113691 | 214002 | 1.9 | 156.1 |
| <b>M7</b>   | 0.025 | 100 | 128 | 0.1614 | 181575 | 112029 | 212129 | 1.9 | 156.1 |
| <b>M8</b>   | 0.025 | 70  | 232 | 0.3972 | 246538 | 190238 | 674149 | 3.5 | 157.8 |
| <b>M8</b>   | 0.025 | 70  | 412 | 0.3244 | 113383 | 413569 | 956559 | 2.3 | 159.3 |
| <b>M8</b>   | 0.025 | 100 | 81  | 0.1982 | 352356 | 117954 | 251074 | 2.1 | 156.0 |
| <b>M8</b>   | 0.025 | 100 | 138 | 0.1808 | 188661 | 169949 | 312315 | 1.8 | 156.0 |
| <b>M8</b>   | 0.025 | 100 | 92  | 0.2225 | 348261 | 120698 | 259599 | 2.2 | 155.1 |
| <b>M9</b>   | 0.025 | 70  | 256 | 0.3557 | 200081 | 259077 | 721335 | 2.8 | 157.3 |
| <b>M9</b>   | 0.025 | 70  | 295 | 0.4169 | 203504 | 166783 | 564726 | 3.4 | 157.6 |
| <b>M9</b>   | 0.025 | 70  | 292 | 0.3921 | 193364 | 257509 | 674125 | 2.6 | 157.3 |
| <b>M9</b>   | 0.025 | 100 | 86  | 0.1964 | 328856 | 114174 | 226791 | 2.0 | 154.6 |
| <b>M9</b>   | 0.025 | 100 | 100 | 0.2046 | 294624 | 97319  | 204599 | 2.1 | 154.5 |
| <b>M9</b>   | 0.025 | 100 | 97  | 0.1894 | 281171 | 131549 | 249047 | 1.9 | 155.8 |
| <b>M10</b>  | 0.025 | 70  | 390 | 0.198  | 73108  | 571940 | 953902 | 1.7 | 159.6 |
| <b>M10</b>  | 0.025 | 70  | 428 | 0.3976 | 133772 | 311196 | 751614 | 2.4 | 158.6 |
| <b>M10</b>  | 0.025 | 70  | 424 | 0.2569 | 87249  | 479430 | 961949 | 2.0 | 159.1 |
| <b>M10</b>  | 0.025 | 100 | 126 | 0.172  | 196571 | 133886 | 270557 | 2.0 | 155.1 |
| <b>M10</b>  | 0.025 | 100 | 138 | 0.1775 | 185217 | 147897 | 277704 | 1.9 | 157.1 |
| <b>M10</b>  | 0.025 | 100 | 136 | 0.1641 | 173753 | 128984 | 248432 | 1.9 | 155.6 |
| <b>M12</b>  | 0.025 | 70  | 70  | 0.3891 | 800434 | 83339  | 286041 | 3.4 | 154.1 |
| <b>M12</b>  | 0.025 | 70  | 81  | 0.3564 | 633600 | 71206  | 282882 | 4.0 | 154.5 |
| <b>M12</b>  | 0.025 | 100 | 41  | 0.2323 | 815883 | 57482  | 151791 | 2.6 | 154.5 |
| <b>M12</b>  | 0.025 | 100 | 44  | 0.2384 | 780218 | 72710  | 161890 | 2.2 | 155.3 |
| <b>M12</b>  | 0.025 | 100 | 45  | 0.2408 | 770560 | 61994  | 134964 | 2.2 | 155.0 |
| <b>M-II</b> | 0.025 | 70  | 268 | 0.3633 | 195206 | 251696 | 665814 | 2.7 | 161.7 |
| <b>M-II</b> | 0.025 | 70  | 323 | 0.2909 | 129689 | 516715 | 963614 | 1.9 | 162.4 |
| <b>M-II</b> | 0.025 | 100 | 97  | 0.1505 | 223423 | 125019 | 215082 | 1.7 | 155.8 |
| <b>M-II</b> | 0.025 | 100 | 120 | 0.1669 | 200280 | 105326 | 208174 | 2.0 | 155.5 |

<sup>a</sup> Polymerization conditions: 1.1 equivs. [HMe<sub>2</sub>NPh][B(C<sub>6</sub>F<sub>5</sub>)<sub>4</sub>], 0.5 μmol Al(*n*-octyl)<sub>3</sub>, 0.2 mL toluene, 3.9 mL isohexane, 1 mL propylene; reactor quenched at 8 psig pressure loss or at a maximum time limit of 30 minutes. <sup>b</sup> Precatalyst amount. <sup>c</sup> Polymerization temperature. <sup>d</sup> Polymerization time. <sup>e</sup> Polydispersity index, M<sub>w</sub>/M<sub>n</sub>, determined by GPC. <sup>f</sup> Polymer melting temperature, determined by DSC. <sup>g</sup> Solvent: 0.5 mL toluene, 3.6 mL isohexane; reactor quenched at 20 psig pressure loss.

## CRYSTAL STRUCTURE DETERMINATIONS

X-ray experiments were carried out using SMART 1000 CCD diffractometer ( $\lambda(\text{Mo-K}\alpha)=0.71073 \text{ \AA}$ , graphite monochromator,  $\omega$ -scans) at 100–120 °K. All structures were solved by the direct methods and refined by the full-matrix least-squares procedure in anisotropic approximation for non-hydrogen atoms. All the hydrogen atoms were placed in geometrically calculated positions and included in the refinement using riding approximation. The details of data collection and crystal structures refinement for which we used SAINT Plus,<sup>14</sup> SADABS<sup>15</sup> and SHELXTL-97<sup>16</sup> program packages, are summarized in Tables S3 through S8. Crystallographic data for **C16**, **C22**, **M6**, **M7**, **M10** and **M12** have been deposited with the Cambridge Crystallographic Data Center, CCDC Nos. 2046384–2046389. Copies of this information may be obtained from the Director, CCDC, 12 Union Road, Cambridge CB2 1EZ, UK (Fax: +44 1223 336033; e-mail: [deposit@ccdc.cam.ac.uk](mailto:deposit@ccdc.cam.ac.uk) or [www.ccdc.cam.ac.uk](http://www.ccdc.cam.ac.uk)).

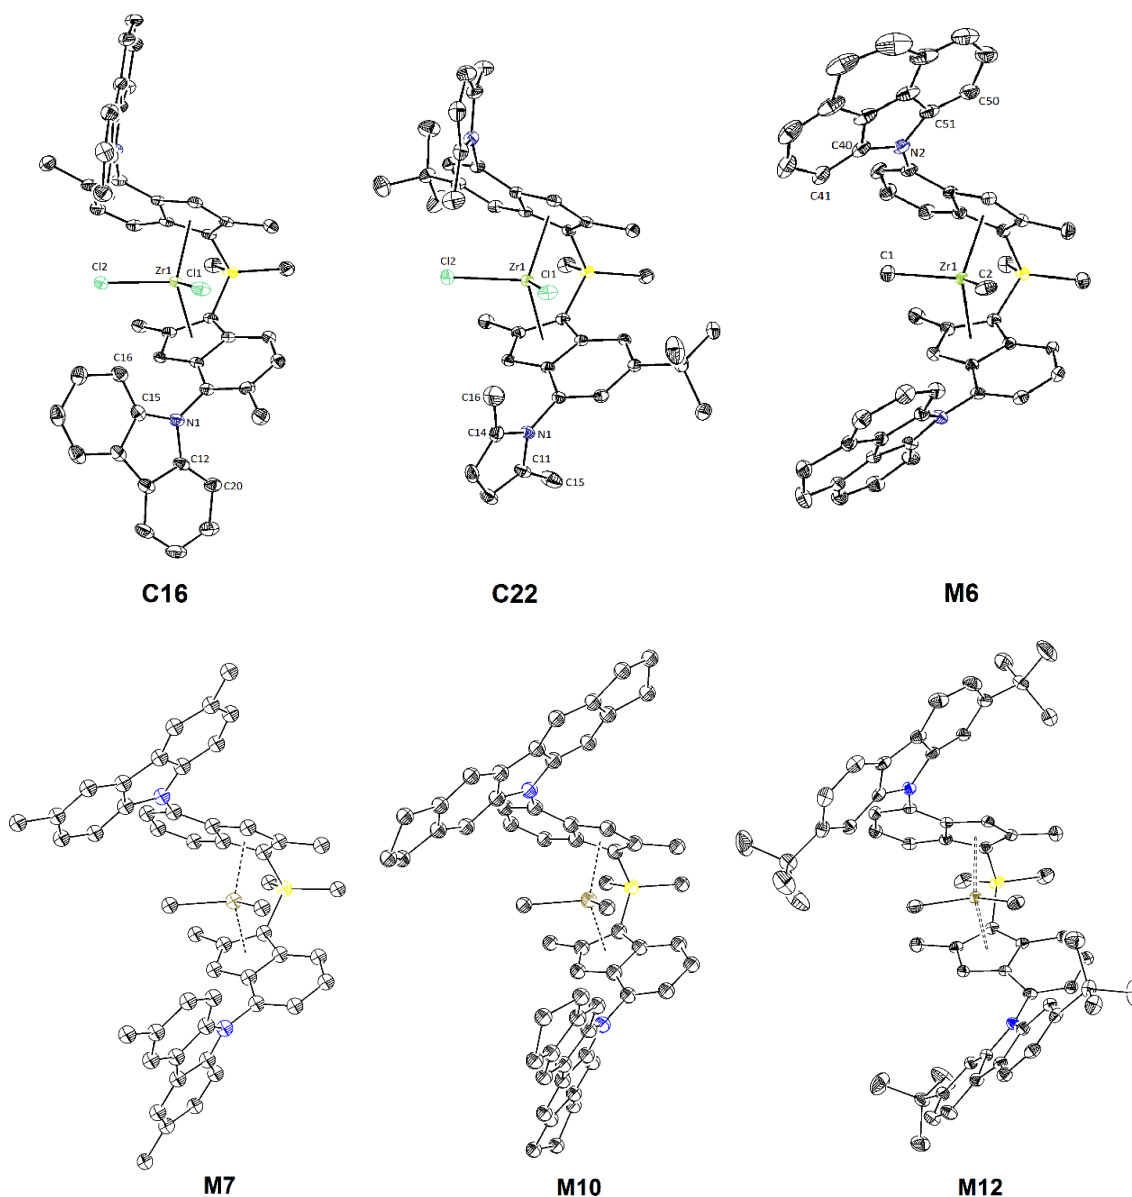

**Figure S1.** ORTEP style representation of zirconocenes **M7**, **M10** and **M12** with ellipsoids drawn at 50% probability level. Hydrogen atoms are omitted for clarity.

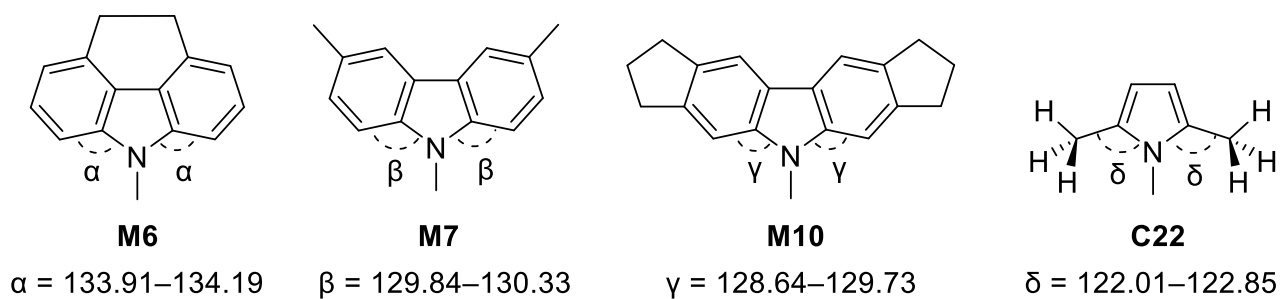

**Figure S2.** Angles N(9)–C(8a/9a)–C(8/1) in carbazolyl moieties in **M7**, **M8**, **M11** and angles N(1)–C(2/5)–CH<sub>3</sub> in **C23**. Data from the X-Ray analyses.

**Table S3. Crystal data and structure refinement for C16 (CCDC 2046385)**

|                                   |                                             |                                |
|-----------------------------------|---------------------------------------------|--------------------------------|
| Empirical formula                 | C62 H56 Cl2 N2 Si Zr                        |                                |
| Formula weight                    | 1019.30                                     |                                |
| Temperature                       | 120(2) K                                    |                                |
| Wavelength                        | 0.71073 Å                                   |                                |
| Crystal system                    | Triclinic                                   |                                |
| Space group                       | P -1                                        |                                |
| Unit cell dimensions              | a = 13.6391(10) Å                           | $\alpha = 88.4788(13)^\circ$ . |
|                                   | b = 13.7468(10) Å                           | $\beta = 75.8186(13)^\circ$ .  |
|                                   | c = 15.4585(12) Å                           | $\gamma = 63.3302(12)^\circ$ . |
| Volume                            | 2499.4(3) Å <sup>3</sup>                    |                                |
| Z                                 | 2                                           |                                |
| Density (calculated)              | 1.354 Mg/m <sup>3</sup>                     |                                |
| Absorption coefficient            | 0.394 mm <sup>-1</sup>                      |                                |
| F(000)                            | 1060                                        |                                |
| Crystal size                      | 0.43 x 0.31 x 0.24 mm <sup>3</sup>          |                                |
| Theta range for data collection   | 1.67 to 29.00°.                             |                                |
| Index ranges                      | -17<=h<=18, -18<=k<=18, 0<=l<=21            |                                |
| Reflections collected             | 13139                                       |                                |
| Independent reflections           | 13150 [R(int) = 0.0000]                     |                                |
| Completeness to theta = 29.00°    | 98.8 %                                      |                                |
| Absorption correction             | Semi-empirical from equivalents             |                                |
| Max. and min. transmission        | 0.911 and 0.849                             |                                |
| Refinement method                 | Full-matrix least-squares on F <sup>2</sup> |                                |
| Data / restraints / parameters    | 13150 / 0 / 622                             |                                |
| Goodness-of-fit on F <sup>2</sup> | 1.064                                       |                                |
| Final R indices [I>2sigma(I)]     | R1 = 0.0352, wR2 = 0.0812                   |                                |
| R indices (all data)              | R1 = 0.0489, wR2 = 0.0927                   |                                |
| Largest diff. peak and hole       | 0.760 and -0.569 e.Å <sup>-3</sup>          |                                |



**Table S4. Crystal data and structure refinement for C22 (CCDC 2046384)**

|                                   |                                                                                                                                                        |
|-----------------------------------|--------------------------------------------------------------------------------------------------------------------------------------------------------|
| Empirical formula                 | C <sub>45.50</sub> H <sub>56</sub> Cl <sub>2</sub> N <sub>2</sub> Si Zr                                                                                |
| Formula weight                    | 821.13                                                                                                                                                 |
| Temperature                       | 100(2) K                                                                                                                                               |
| Wavelength                        | 0.71073 Å                                                                                                                                              |
| Crystal system                    | Monoclinic                                                                                                                                             |
| Space group                       | P 2 <sub>1</sub> /n                                                                                                                                    |
| Unit cell dimensions              | a = 12.731(2) Å                      α = 90°.<br>b = 21.255(4) Å                      β = 92.626(3)°.<br>c = 15.501(3) Å                      γ = 90°. |
| Volume                            | 4190.2(12) Å <sup>3</sup>                                                                                                                              |
| Z                                 | 4                                                                                                                                                      |
| Density (calculated)              | 1.302 Mg/m <sup>3</sup>                                                                                                                                |
| Absorption coefficient            | 0.452 mm <sup>-1</sup>                                                                                                                                 |
| F(000)                            | 1724                                                                                                                                                   |
| Crystal size                      | 0.37 x 0.31 x 0.21 mm <sup>3</sup>                                                                                                                     |
| Theta range for data collection   | 1.87 to 29.00°.                                                                                                                                        |
| Index ranges                      | -17 ≤ h ≤ 17, -28 ≤ k ≤ 28, -21 ≤ l ≤ 21                                                                                                               |
| Reflections collected             | 51670                                                                                                                                                  |
| Independent reflections           | 11146 [R(int) = 0.0498]                                                                                                                                |
| Observed reflections [I > 2σ(I)]  | 9481                                                                                                                                                   |
| Completeness to theta = 29.00°    | 100.0 %                                                                                                                                                |
| Absorption correction             | Semi-empirical from equivalents                                                                                                                        |
| Max. and min. transmission        | 0.898 and 0.841                                                                                                                                        |
| Refinement method                 | Full-matrix least-squares on F <sup>2</sup>                                                                                                            |
| Data / restraints / parameters    | 11146 / 0 / 501                                                                                                                                        |
| Goodness-of-fit on F <sup>2</sup> | 1.009                                                                                                                                                  |
| Final R indices [I > 2σ(I)]       | R1 = 0.0301, wR2 = 0.0784                                                                                                                              |
| R indices (all data)              | R1 = 0.0385, wR2 = 0.0832                                                                                                                              |
| Largest diff. peak and hole       | 0.488 and -0.528 e.Å <sup>-3</sup>                                                                                                                     |

**Table S5. Crystal data and structure refinement for M6 (CCDC 2046388)**

|                                                                   |                                                               |                               |
|-------------------------------------------------------------------|---------------------------------------------------------------|-------------------------------|
| Empirical formula                                                 | C <sub>59</sub> H <sub>54</sub> N <sub>2</sub> Si Zr          |                               |
| Formula weight                                                    | 910.35                                                        |                               |
| Temperature                                                       | 120(2) K                                                      |                               |
| Wavelength                                                        | 0.71073 Å                                                     |                               |
| Crystal system                                                    | Monoclinic                                                    |                               |
| Space group                                                       | <i>P</i> 2 <sub>1</sub> / <i>c</i>                            |                               |
| Unit cell dimensions                                              | <i>a</i> = 12.2494(5) Å                                       | $\alpha = 90^\circ$ .         |
|                                                                   | <i>b</i> = 20.1522(8) Å                                       | $\beta = 91.7810(10)^\circ$ . |
|                                                                   | <i>c</i> = 18.6075(8) Å                                       | $\gamma = 90^\circ$ .         |
| Volume                                                            | 4591.1(3) Å <sup>3</sup>                                      |                               |
| Z                                                                 | 4                                                             |                               |
| Density (calculated)                                              | 1.317 Mg/m <sup>3</sup>                                       |                               |
| Absorption coefficient                                            | 0.308 mm <sup>-1</sup>                                        |                               |
| F(000)                                                            | 1904                                                          |                               |
| Crystal size                                                      | 0.330 x 0.280 x 0.240 mm <sup>3</sup>                         |                               |
| Theta range for data collection                                   | 1.490 to 29.999°.                                             |                               |
| Index ranges                                                      | -17 ≤ <i>h</i> ≤ 17, -28 ≤ <i>k</i> ≤ 28, -26 ≤ <i>l</i> ≤ 26 |                               |
| Reflections collected                                             | 98445                                                         |                               |
| Independent reflections                                           | 13397 [R(int) = 0.0371]                                       |                               |
| Completeness to theta = 25.242°                                   | 100.0 %                                                       |                               |
| Absorption correction                                             | Semi-empirical from equivalents                               |                               |
| Max. and min. transmission                                        | 0.862 and 0.838                                               |                               |
| Refinement method                                                 | Full-matrix least-squares on F <sup>2</sup>                   |                               |
| Data / restraints / parameters                                    | 13397 / 0 / 615                                               |                               |
| Goodness-of-fit on F <sup>2</sup>                                 | 1.012                                                         |                               |
| Final R indices for 11187 refl. with [ <i>I</i> > 2σ( <i>I</i> )] | R1 = 0.0301, wR2 = 0.0756                                     |                               |
| R indices (all data)                                              | R1 = 0.0406, wR2 = 0.0830                                     |                               |
| Extinction coefficient                                            | <i>n/a</i>                                                    |                               |
| Largest diff. peak and hole                                       | 0.461 and -0.435 e.Å <sup>-3</sup>                            |                               |

**Table S6. Crystal data and structure refinement for M7 (CCDC 2046387)**

|                                   |                                                      |                 |
|-----------------------------------|------------------------------------------------------|-----------------|
| Empirical formula                 | C <sub>59</sub> H <sub>58</sub> N <sub>2</sub> Si Zr |                 |
| Formula weight                    | 914.38                                               |                 |
| Temperature                       | 120(2) K                                             |                 |
| Wavelength                        | 0.71073 Å                                            |                 |
| Crystal system                    | Triclinic                                            |                 |
| Space group                       | P-1                                                  |                 |
| Unit cell dimensions              | a = 11.8095(9) Å                                     | α = 77.496(2)°. |
|                                   | b = 12.3878(9) Å                                     | β = 85.801(2)°. |
|                                   | c = 16.4897(13) Å                                    | γ = 81.266(2)°. |
| Volume                            | 2325.8(3) Å <sup>3</sup>                             |                 |
| Z                                 | 2                                                    |                 |
| Density (calculated)              | 1.306 Mg/m <sup>3</sup>                              |                 |
| Absorption coefficient            | 0.304 mm <sup>-1</sup>                               |                 |
| F(000)                            | 960                                                  |                 |
| Crystal size                      | 0.260 x 0.210 x 0.170 mm <sup>3</sup>                |                 |
| Theta range for data collection   | 1.700 to 30.588°.                                    |                 |
| Index ranges                      | -16<=h<=16, -17<=k<=17, -23<=l<=23                   |                 |
| Reflections collected             | 32185                                                |                 |
| Independent reflections           | 14231 [R(int) = 0.0493]                              |                 |
| Completeness to theta = 25.242°   | 100.0 %                                              |                 |
| Absorption correction             | Semi-empirical from equivalents                      |                 |
| Max. and min. transmission        | 0.4330 and 0.3609                                    |                 |
| Refinement method                 | Full-matrix least-squares on F <sup>2</sup>          |                 |
| Data / restraints / parameters    | 14231 / 0 / 579                                      |                 |
| Goodness-of-fit on F <sup>2</sup> | 1.012                                                |                 |
| Final R indices [I>2sigma(I)]     | R1 = 0.0510, wR2 = 0.1196                            |                 |
| R indices (all data)              | R1 = 0.0791, wR2 = 0.1338                            |                 |
| Extinction coefficient            | n/a                                                  |                 |
| Largest diff. peak and hole       | 1.022 and -1.198 e.Å <sup>-3</sup>                   |                 |

**Table S7. Crystal data and structure refinement for M10 (CCDC 2046386)**

|                                   |                                             |                   |
|-----------------------------------|---------------------------------------------|-------------------|
| Empirical formula                 | C74 H74 N2 Si Zr                            |                   |
| Formula weight                    | 1110.66                                     |                   |
| Temperature                       | 120(2) K                                    |                   |
| Wavelength                        | 0.71073 Å                                   |                   |
| Crystal system                    | Monoclinic                                  |                   |
| Space group                       | P2 <sub>1</sub> /n                          |                   |
| Unit cell dimensions              | a = 11.9734(6) Å                            | α = 90°.          |
|                                   | b = 37.0630(19) Å                           | β = 91.4286(13)°. |
|                                   | c = 12.9008(7) Å                            | γ = 90°.          |
| Volume                            | 5723.2(5) Å <sup>3</sup>                    |                   |
| Z                                 | 4                                           |                   |
| Density (calculated)              | 1.289 Mg/m <sup>3</sup>                     |                   |
| Absorption coefficient            | 0.260 mm <sup>-1</sup>                      |                   |
| F(000)                            | 2344                                        |                   |
| Crystal size                      | 0.270 x 0.210 x 0.180 mm <sup>3</sup>       |                   |
| Theta range for data collection   | 1.672 to 30.573°.                           |                   |
| Index ranges                      | -17<=h<=17, -52<=k<=52, -18<=l<=18          |                   |
| Reflections collected             | 79037                                       |                   |
| Independent reflections           | 17505 [R(int) = 0.0933]                     |                   |
| Completeness to theta = 25.242°   | 100.0 %                                     |                   |
| Absorption correction             | Semi-empirical from equivalents             |                   |
| Max. and min. transmission        | 0.4330 and 0.3785                           |                   |
| Refinement method                 | Full-matrix least-squares on F <sup>2</sup> |                   |
| Data / restraints / parameters    | 17505 / 0 / 686                             |                   |
| Goodness-of-fit on F <sup>2</sup> | 1.015                                       |                   |
| Final R indices [I>2sigma(I)]     | R1 = 0.0555, wR2 = 0.1257                   |                   |
| R indices (all data)              | R1 = 0.0917, wR2 = 0.1431                   |                   |
| Extinction coefficient            | n/a                                         |                   |
| Largest diff. peak and hole       | 1.396 and -0.699 e.Å <sup>-3</sup>          |                   |

**Table S8. Crystal data and structure refinement for M12 (CCDC 2046389)**

|                                   |                                             |                    |
|-----------------------------------|---------------------------------------------|--------------------|
| Empirical formula                 | C70.50 H85 N2 Si Zr                         |                    |
| Formula weight                    | 1079.71                                     |                    |
| Temperature                       | 120(2) K                                    |                    |
| Wavelength                        | 0.71073 Å                                   |                    |
| Crystal system                    | Monoclinic                                  |                    |
| Space group                       | P2 <sub>1</sub> /n                          |                    |
| Unit cell dimensions              | a = 13.9493(6) Å                            | α = 90°.           |
|                                   | b = 24.3226(10) Å                           | β = 109.8610(10)°. |
|                                   | c = 19.1054(8) Å                            | γ = 90°.           |
| Volume                            | 6096.6(4) Å <sup>3</sup>                    |                    |
| Z                                 | 4                                           |                    |
| Density (calculated)              | 1.176 Mg/m <sup>3</sup>                     |                    |
| Absorption coefficient            | 0.242 mm <sup>-1</sup>                      |                    |
| F(000)                            | 2304                                        |                    |
| Crystal size                      | 0.290 x 0.200 x 0.180 mm <sup>3</sup>       |                    |
| Theta range for data collection   | 1.674 to 30.677°.                           |                    |
| Index ranges                      | -19<=h<=19, -34<=k<=34, -27<=l<=27          |                    |
| Reflections collected             | 83706                                       |                    |
| Independent reflections           | 18638 [R(int) = 0.0724]                     |                    |
| Completeness to theta = 25.242°   | 100.0 %                                     |                    |
| Absorption correction             | Semi-empirical from equivalents             |                    |
| Max. and min. transmission        | 0.3368 and 0.2906                           |                    |
| Refinement method                 | Full-matrix least-squares on F <sup>2</sup> |                    |
| Data / restraints / parameters    | 18638 / 24 / 659                            |                    |
| Goodness-of-fit on F <sup>2</sup> | 1.010                                       |                    |
| Final R indices [I>2sigma(I)]     | R1 = 0.0447, wR2 = 0.1018                   |                    |
| R indices (all data)              | R1 = 0.0760, wR2 = 0.1150                   |                    |
| Extinction coefficient            | n/a                                         |                    |
| Largest diff. peak and hole       | 0.480 and -0.526 e.Å <sup>-3</sup>          |                    |

## REFERENCES

- (1) Izmer, V. V.; Lebedev, A. Y.; Nikulin, M. V.; Ryabov, A. N.; Asachenko, A. F.; Lygin, A. V.; Sorokin, D. A.; Voskoboynikov, A. Z. Palladium-Catalyzed Pathways to Aryl-Substituted Indenes: Efficient Synthesis of Ligands and the Respective Ansa-Zirconocenes. *Organometallics* **2006**, *25* (5), 1217–1229. <https://doi.org/10.1021/om050937e>.
- (2) Gibson, V. C.; Spitzmesser, S. K.; White, A. J. P.; Williams, D. J. Synthesis and Reactivity of 1,8-Bis(Imino)Carbazolide Complexes of Iron, Cobalt and Manganese. *J. Chem. Soc. Dalt. Trans.* **2003**, *3* (13), 2718–2727. <https://doi.org/10.1039/b301902k>.
- (3) Jürgens, E.; Buys, K. N.; Schmidt, A. T.; Furfari, S. K.; Cole, M. L.; Moser, M.; Rominger, F.; Kunz, D. Optimised Synthesis of Monoanionic Bis(NHC)-Pincer Ligand Precursors and Their Li-Complexes. *New J. Chem.* **2016**, *40* (11), 9160–9169. <https://doi.org/10.1039/c6nj01941b>.
- (4) Jeong, E.-J.; Hwang, S.-H.; Kim, Y.-K.; Jung, H.-J.; Park, J.-H.; Lee, E.-Y.; Kim, J.-W.; Lim, J.-O.; Han, S.-H.; Kim, K.-H.; Kim, S.-Y. US 2015/0041775 A1. US 2015/0041775 A1, 2015.
- (5) Voskoboynikov, A. Z.; Ryabov, A. N.; Nikulin, M. V.; Lygin, A. V.; Coker, C. L.; Canich, J. A. M. US 2007/0135595 A1, 2007.
- (6) Ye, X.; Holtcamp, M. W.; McCullough, L. G.; Day, G. S.; Canich, J. A. M.; Sanders, D. F.; Titone, M. E. WO 2016/171808 A1. WO 2016/171808 A1, 2016.
- (7) Voskoboynikov, A. Z.; Nikulin, M. V.; Tsarev, A. N.; Asachenko, A. F.; Babkin, A. V.; Giesbrecht, G. R.; Canich, J. A. M. US 2011/0213109 A1. US 2011/0213109 A1, 2011.
- (8) Rieger, B.; Schöbel, A.; Reichelt, N. EP2532687A2.Pdf. EP 2532687 A2, 2012.
- (9) Park, J. U.; Park, H. N.; Lee, S. J.; Do, S. R.; Kim, S. H. KR2017082917. KR2017082917, 2017.
- (10) Odedra, A.; Wu, C. J.; Pratap, T. B.; Huang, C. W.; Ran, Y. F.; Liu, R. S. Ruthenium-Catalyzed Aromatization of Eneidyne via Highly Regioselective Nucleophilic Additions on a  $\pi$ -Alkyne Functionality. A Useful Method for the Synthesis of Functionalized Benzene Derivatives. *J. Am. Chem. Soc.* **2005**, *127* (10), 3406–3412. <https://doi.org/10.1021/ja043047j>.
- (11) Arndt, S.; Hansmann, M. M.; Motloch, P.; Rudolph, M.; Rominger, F.; Hashmi, A. S. K. Intramolecular *Anti* -Phosphinoauration of Alkynes: An FLP-Motivated Approach to Stable Aurated Phosphindolium Complexes. *Chem. - A Eur. J.* **2017**, *23* (11), 2542–2547. <https://doi.org/10.1002/chem.201605914>.
- (12) Lv, J.; Liu, Q.; Tang, J.; Perdih, F.; Kranjc, K. A Facile Synthesis of Indolo[3,2,1-jk]Carbazoles via Palladium-Catalyzed Intramolecular Cyclization. *Tetrahedron Lett.* **2012**, *53* (39), 5248–5252. <https://doi.org/10.1016/j.tetlet.2012.07.093>.
- (13) Tashiro, M.; Yamato, T. Studies on Selective Preparation of Aromatic Compounds. 20. Selective Preparation of 2-Mono-and 2, 2'-Disubstituted Biphenyl Using the Tert-Butyl Group as a Positional Protective Group. *J. Org. Chem.* **1979**, *44* (17), 3037–3041. <https://doi.org/10.1021/jo01331a016>.
- (24) SMART and SAINT, Release 5.0, Area Detector control and Integration Software, Bruker AXS, Analytical X-Ray Instruments, Madison, Wisconsin, USA, 1998.
- (15) Sheldrick, G.M. SADABS: A Program for Exploiting the Redundancy of Area-detector X-Ray Data, University of Göttingen, Göttingen, Germany, 1999.
- (16) Sheldrick, G.M. SHELXTL-97 Program for Solution and Refinement of Crystal Structure, Bruker AXS Inc., Madison, WI-53719, USA, 1997.

# NMR SPECTRA OF ZIRCONOCENE PRECATALYSTS

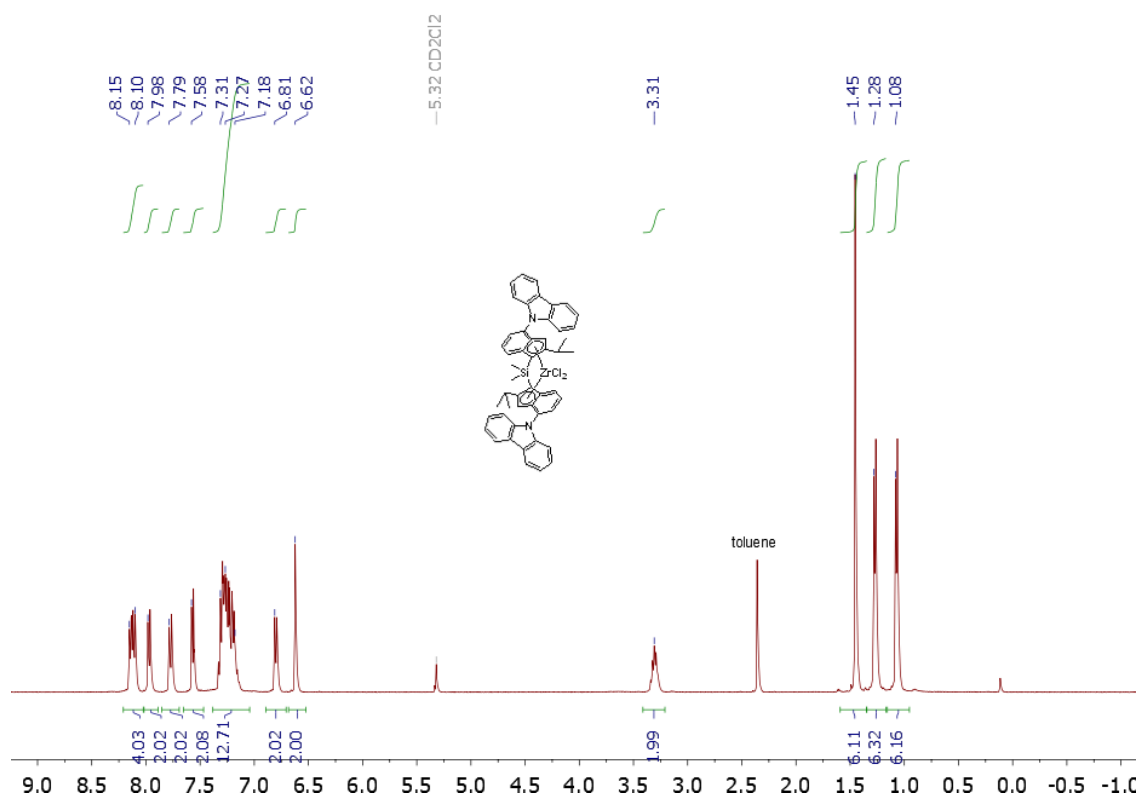

Figure S3. <sup>1</sup>H NMR (400 MHz, CD<sub>2</sub>Cl<sub>2</sub>) spectrum of complex C1.

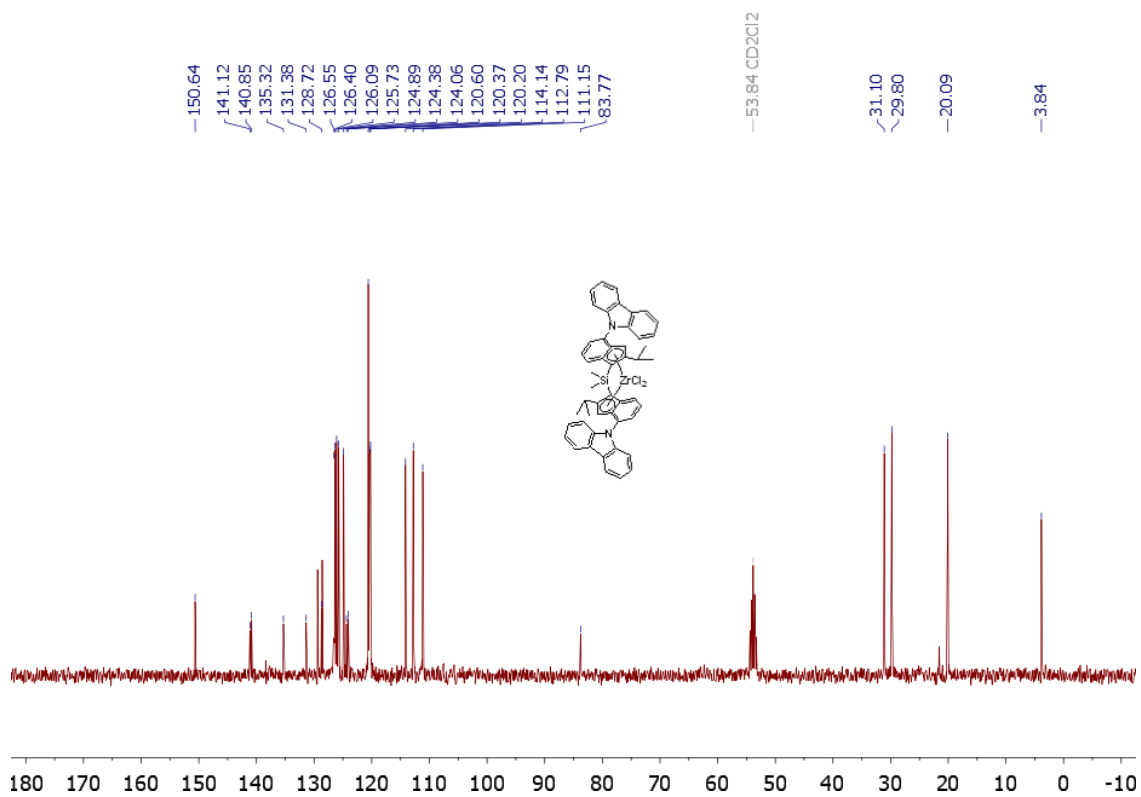

Figure S4. <sup>13</sup>C NMR (100 MHz, CD<sub>2</sub>Cl<sub>2</sub>) spectrum of complex C1.

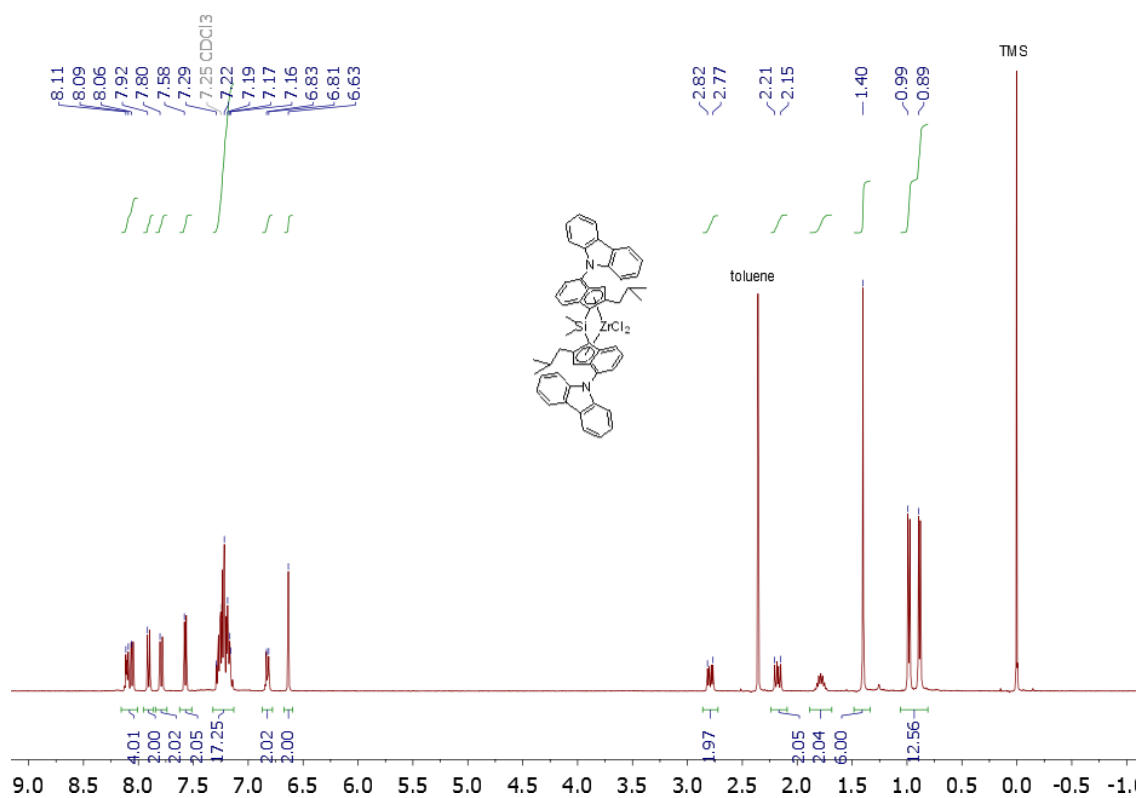

Figure S5.  $^1\text{H}$  NMR (400 MHz,  $\text{CDCl}_3$ ) spectrum of complex C2.

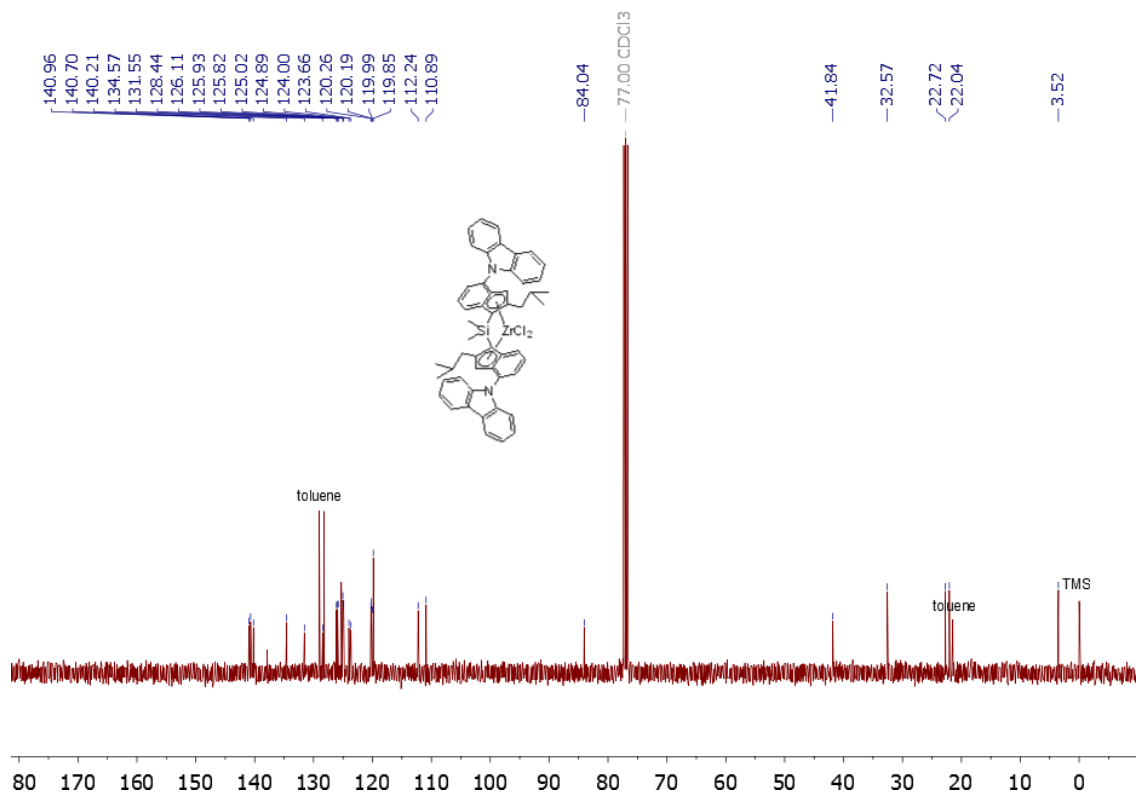

Figure S6.  $^{13}\text{C}$  NMR (100 MHz,  $\text{CDCl}_3$ ) spectrum of complex C2.



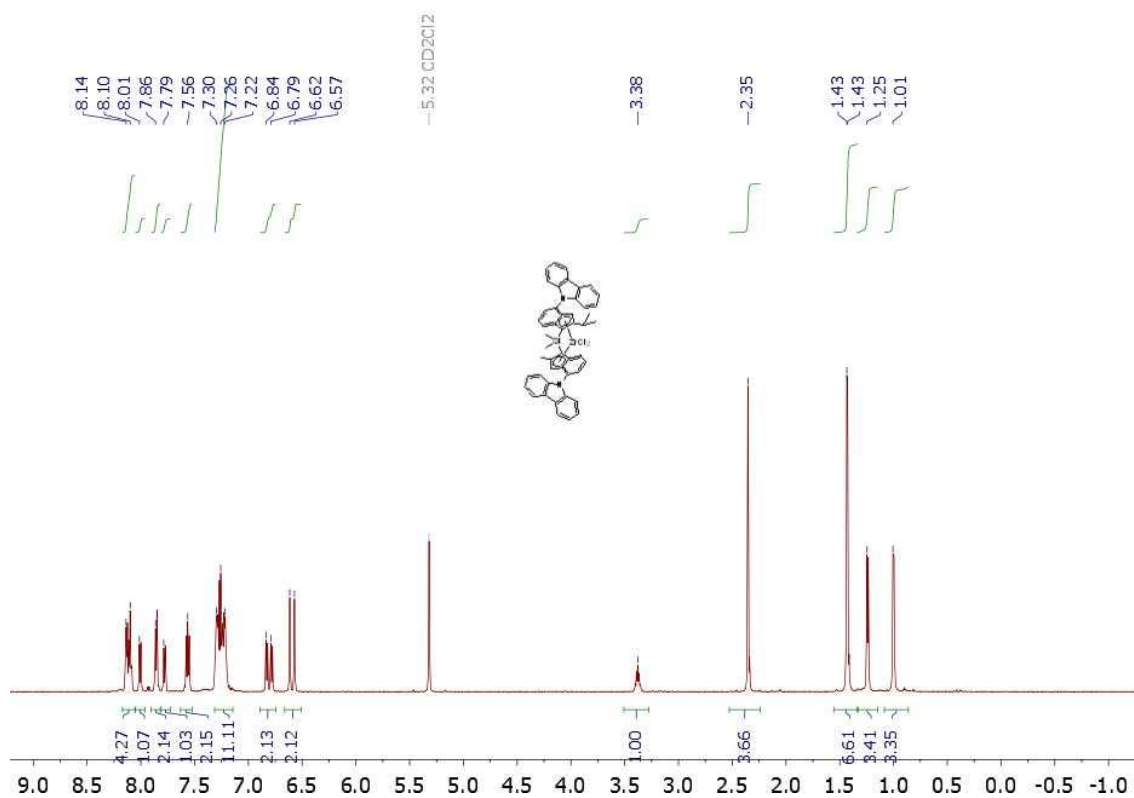

Figure S7. <sup>1</sup>H NMR (400 MHz, CD<sub>2</sub>Cl<sub>2</sub>) spectrum of complex C3.

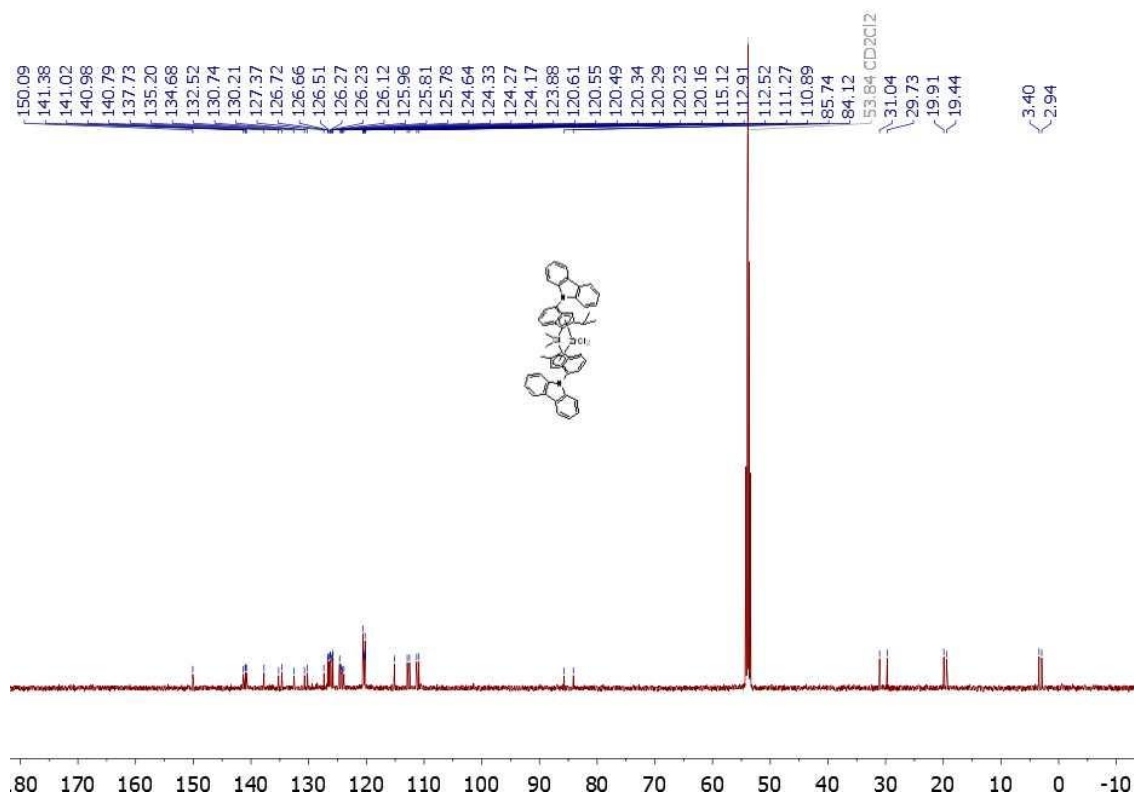

Figure S8. <sup>13</sup>C NMR (100 MHz, CD<sub>2</sub>Cl<sub>2</sub>) spectrum of complex C3.

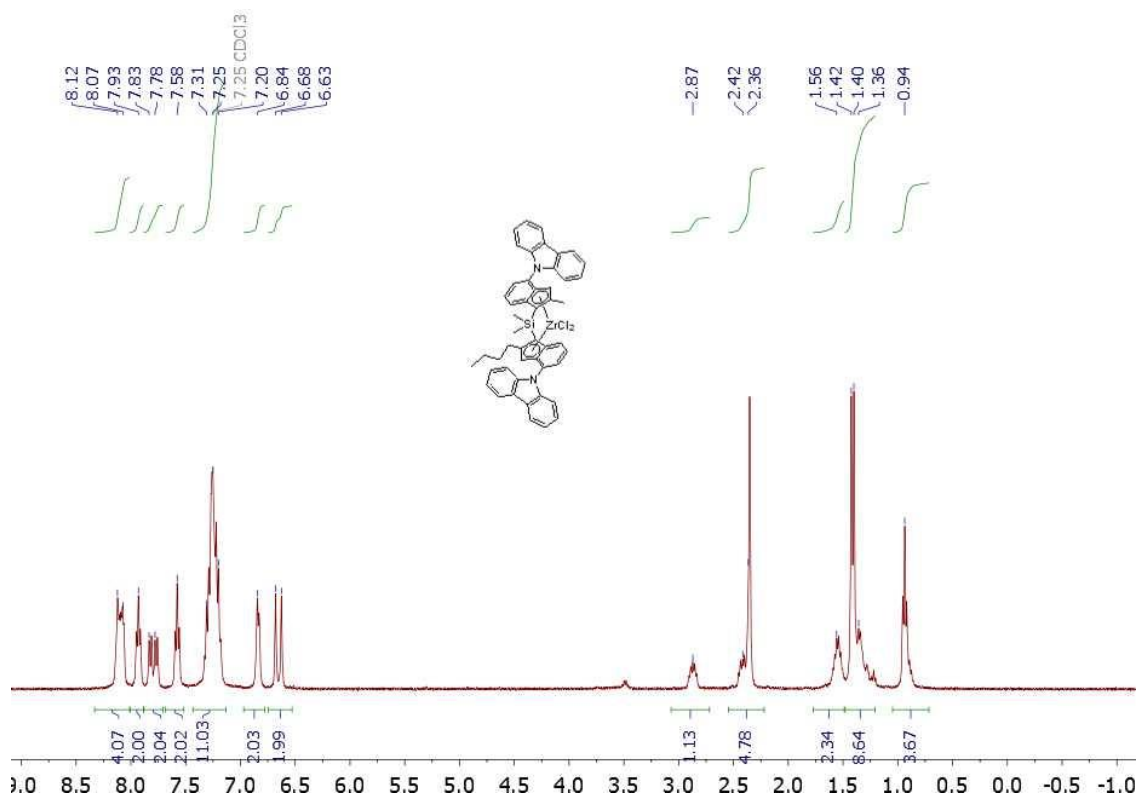

Figure S9. <sup>1</sup>H NMR (400 MHz, CDCl<sub>3</sub>) spectrum of complex C4.

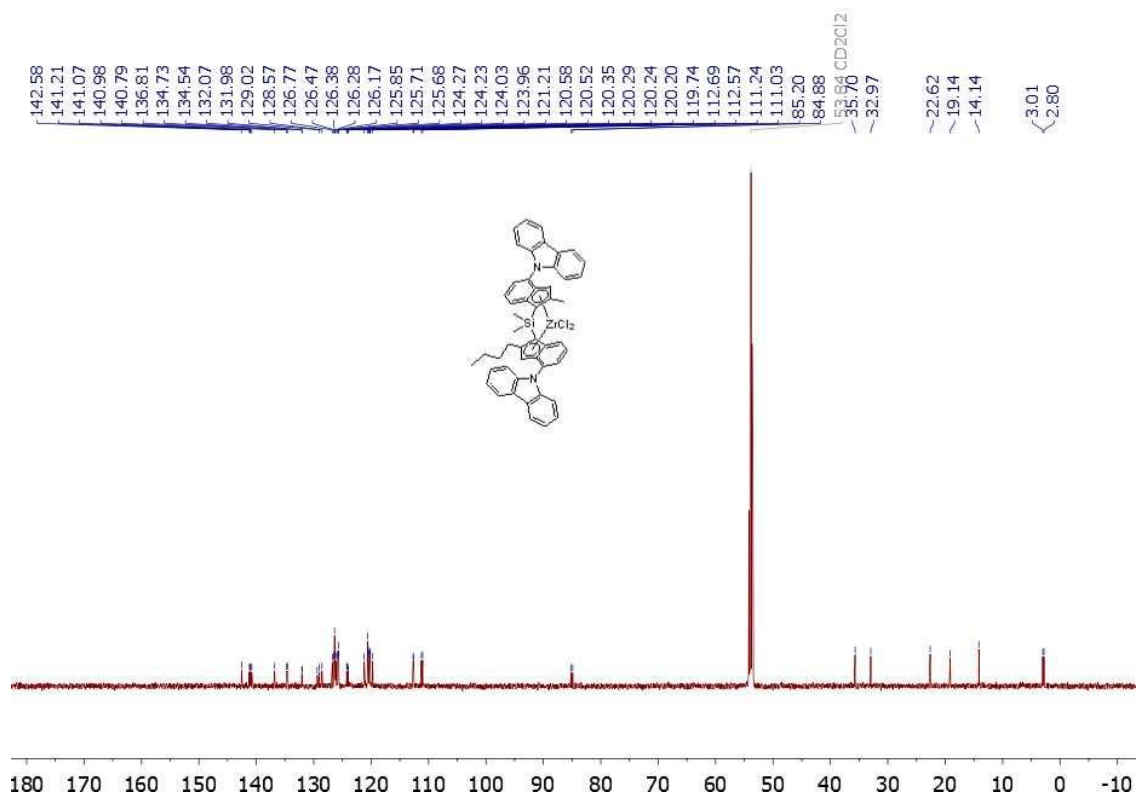

Figure S10. <sup>13</sup>C NMR (100 MHz, CD<sub>2</sub>Cl<sub>2</sub>) spectrum of complex C4.

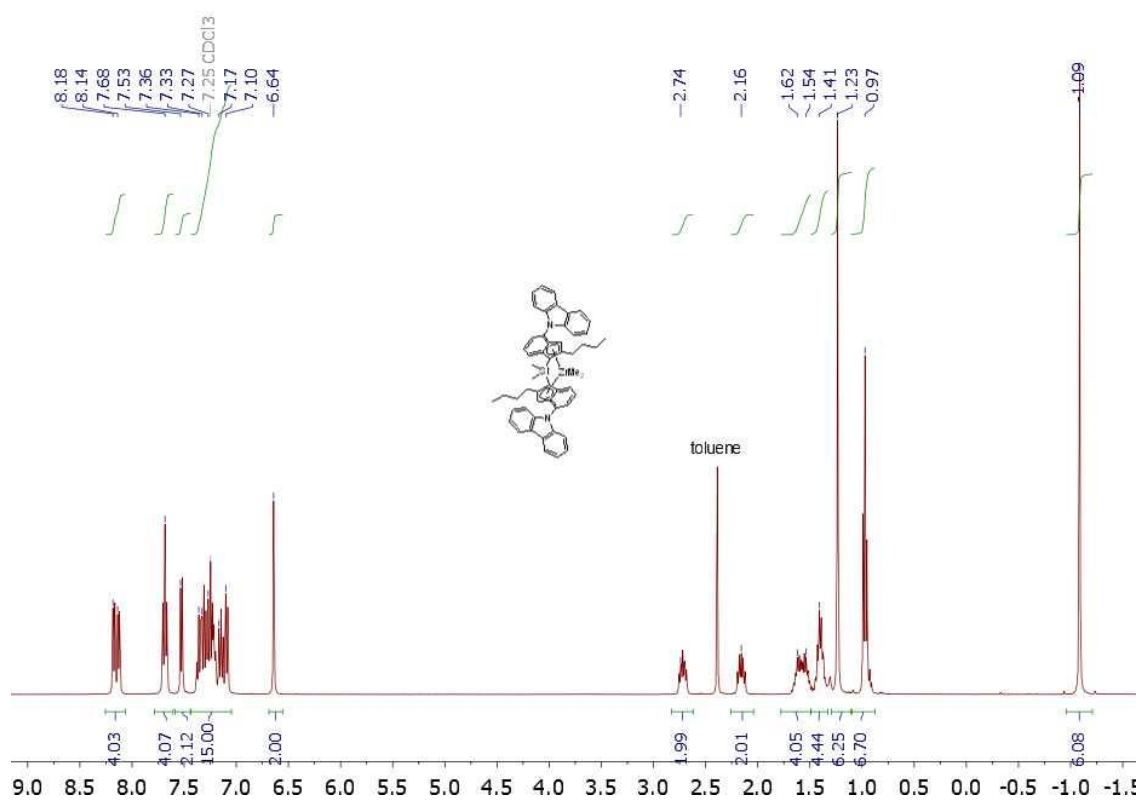

Figure S11. <sup>1</sup>H NMR (400 MHz, CDCl<sub>3</sub>) spectrum of complex M5.

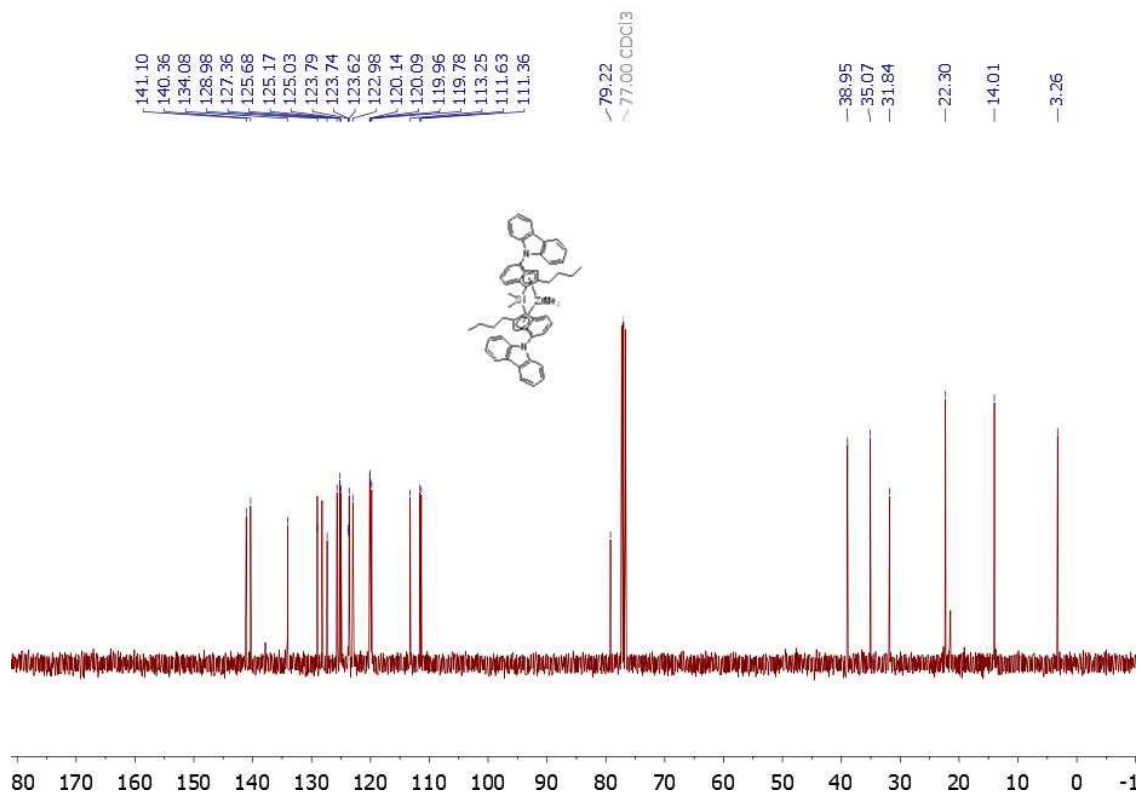

Figure S12. <sup>13</sup>C NMR (100 MHz, CDCl<sub>3</sub>) spectrum of complex M5.

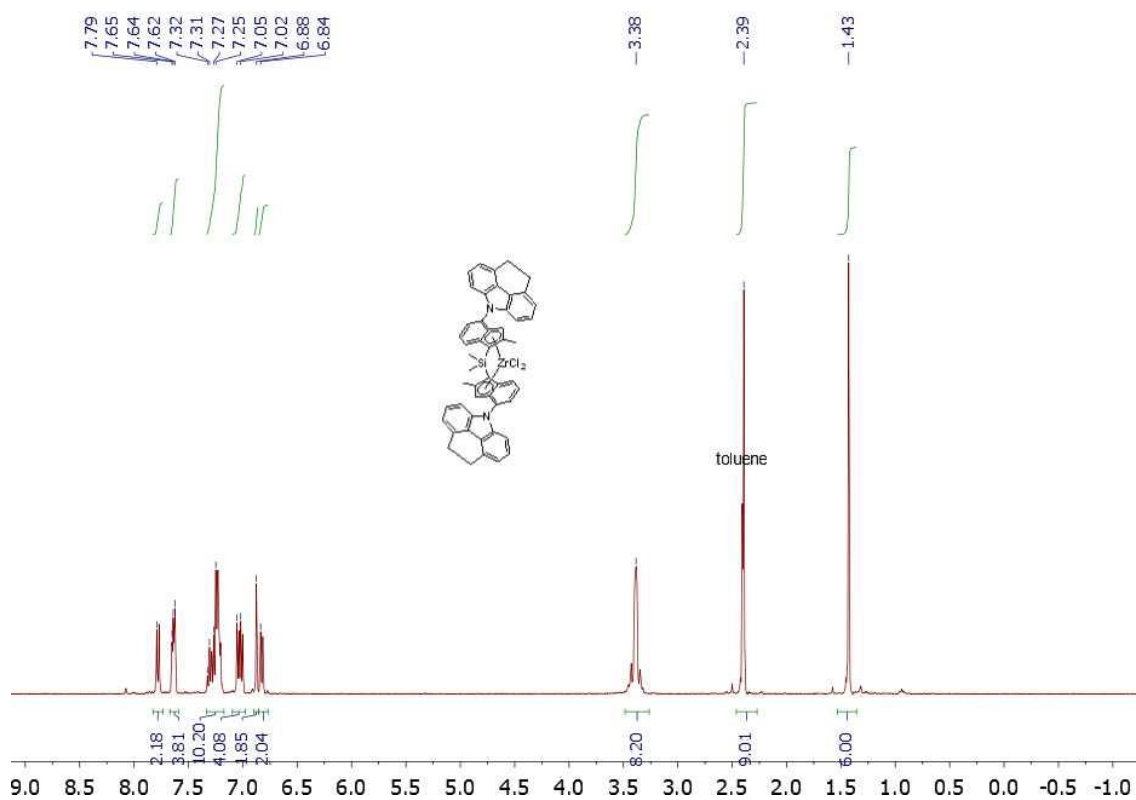

Figure S13. <sup>1</sup>H NMR (400 MHz, CDCl<sub>3</sub>) spectrum of complex C6.

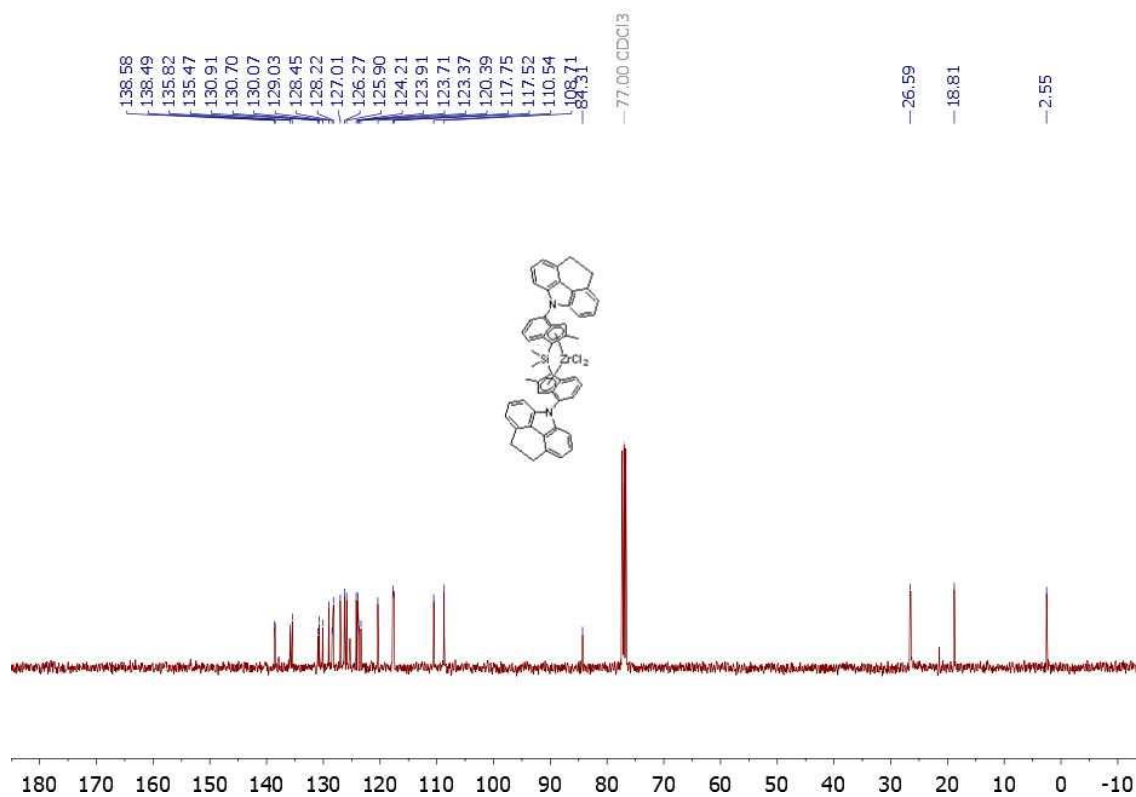

Figure S14. <sup>13</sup>C NMR (100 MHz, CDCl<sub>3</sub>) spectrum of complex C6.

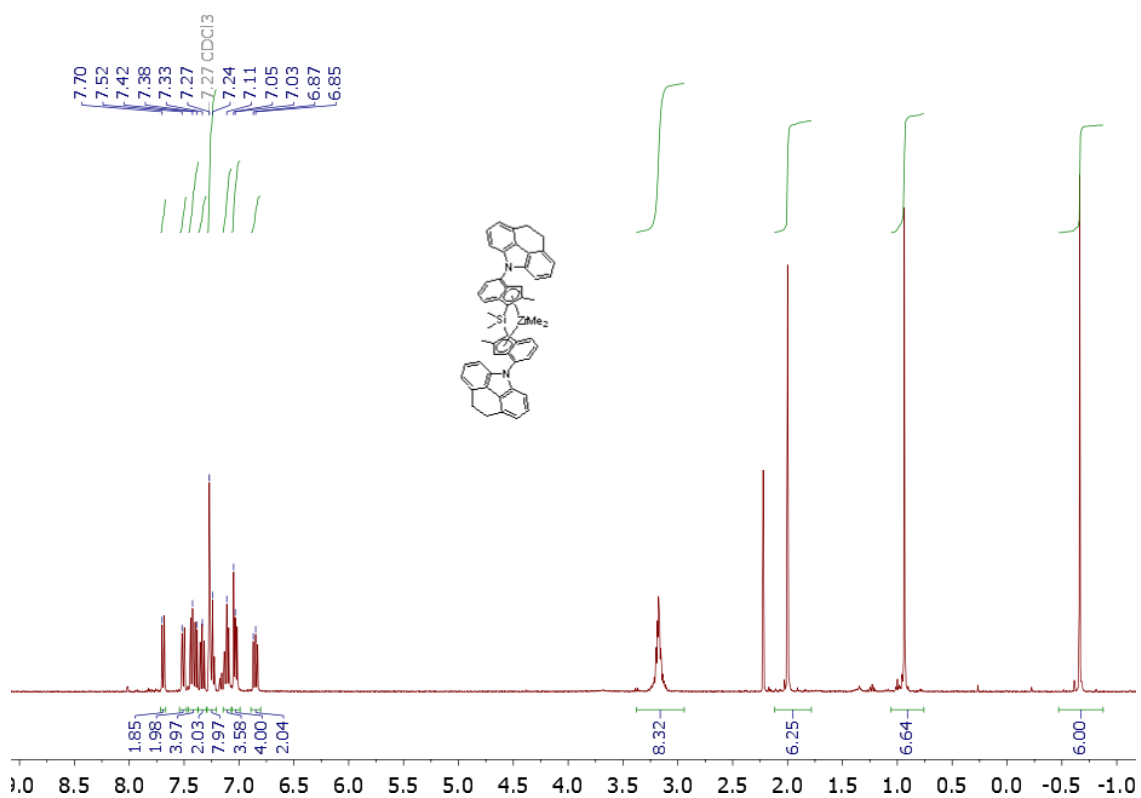

Figure S15. <sup>1</sup>H NMR (400 MHz, CDCl<sub>3</sub>) spectrum of complex M6.

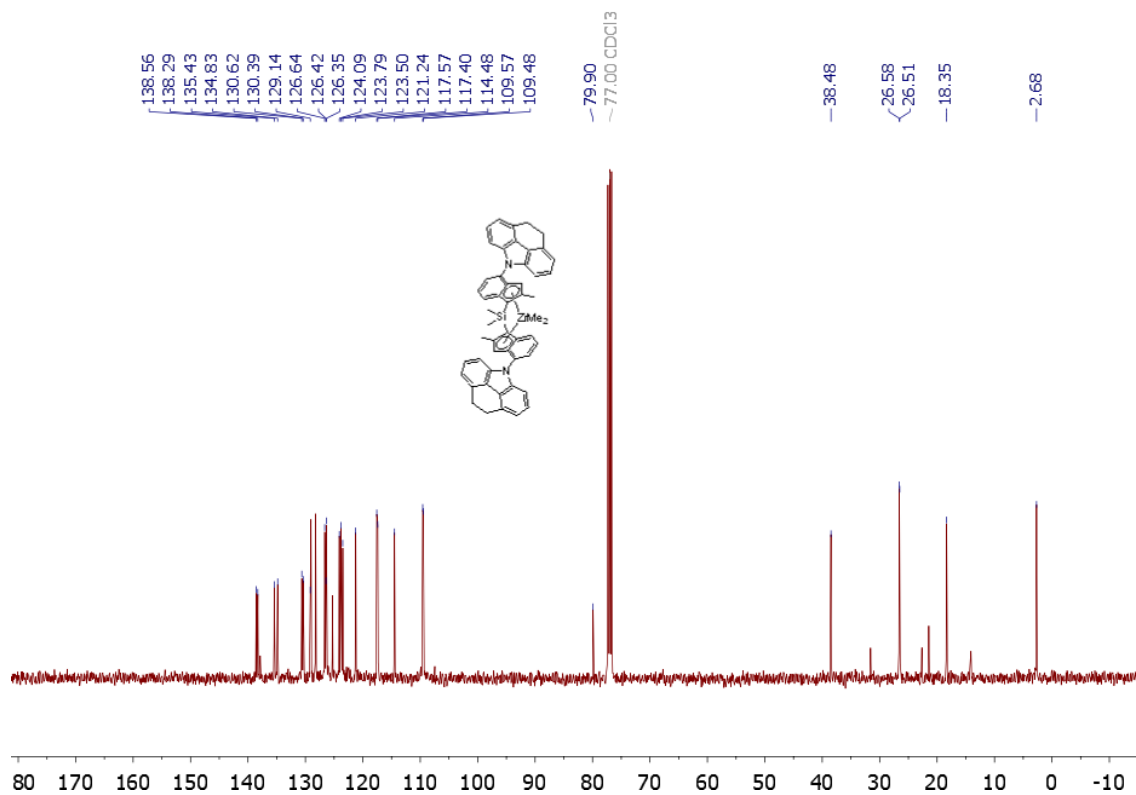

Figure S16. <sup>13</sup>C NMR (100 MHz, CDCl<sub>3</sub>) spectrum of complex M6.

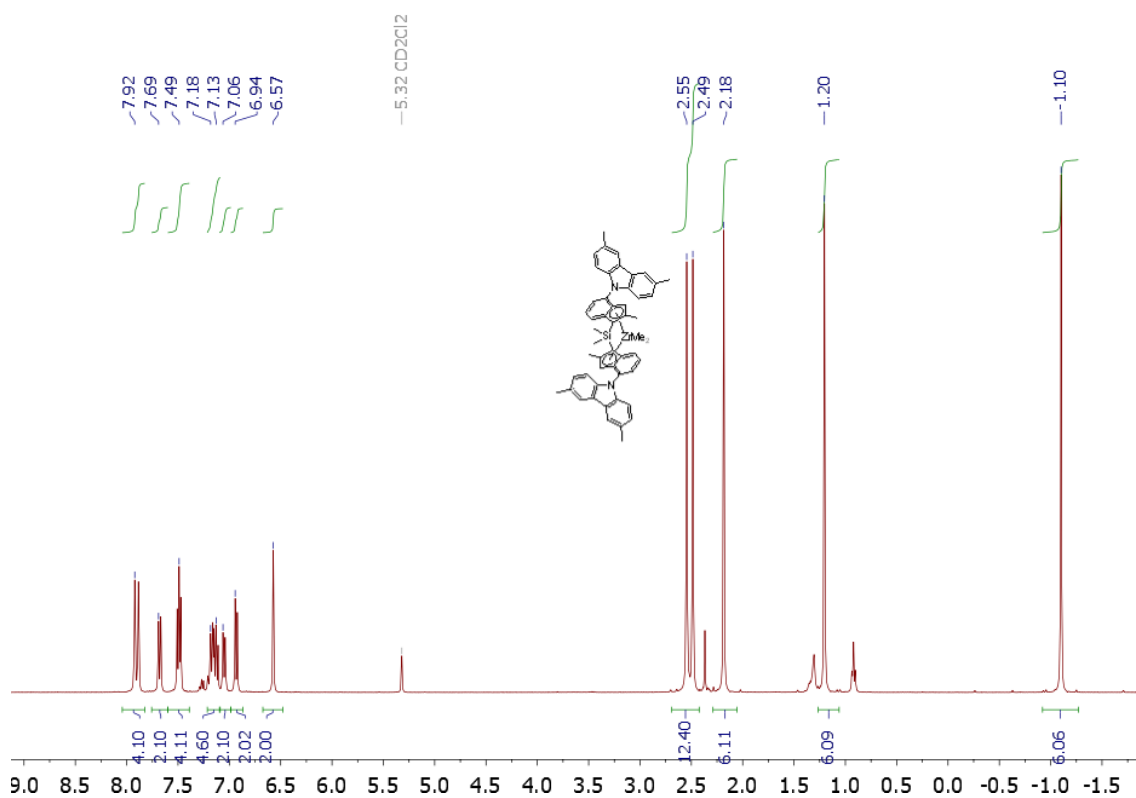

Figure S17. <sup>1</sup>H NMR (400 MHz, CD<sub>2</sub>Cl<sub>2</sub>) spectrum of complex M7.

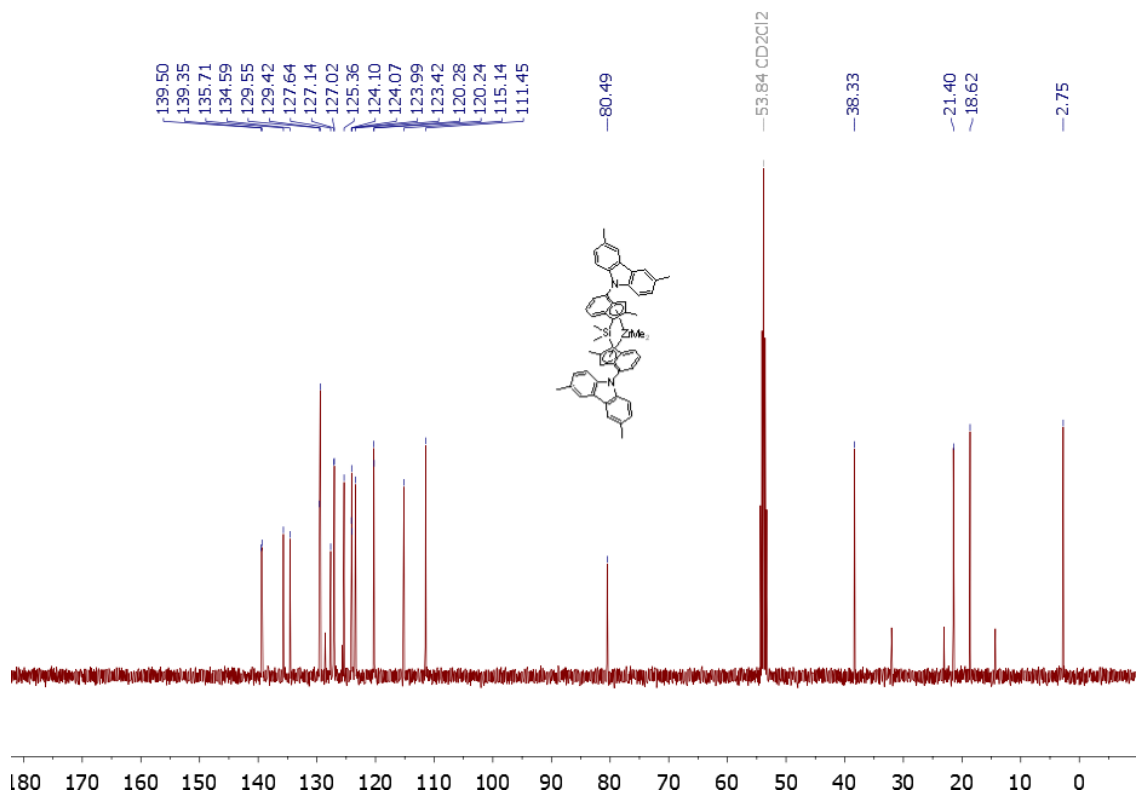

Figure S18. <sup>13</sup>C NMR (100 MHz, CD<sub>2</sub>Cl<sub>2</sub>) spectrum of complex M7.



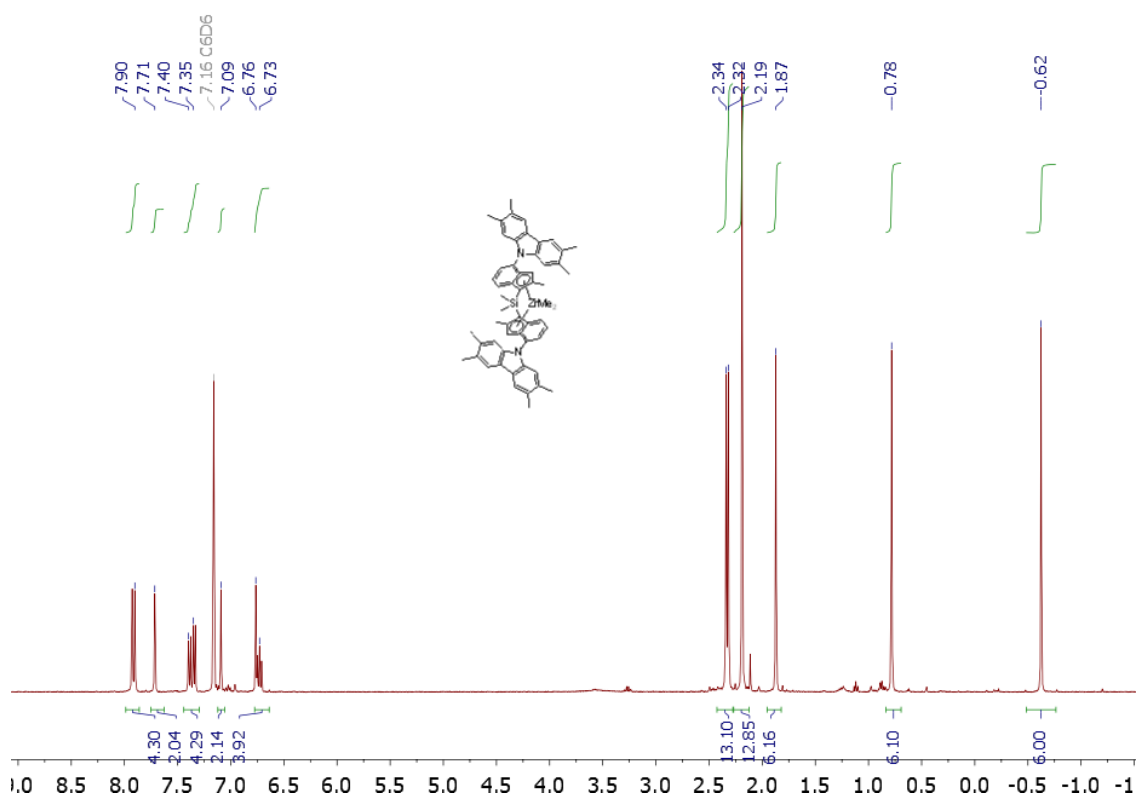

Figure S21. <sup>1</sup>H NMR (400 MHz, C<sub>6</sub>D<sub>6</sub>) spectrum of complex M9.

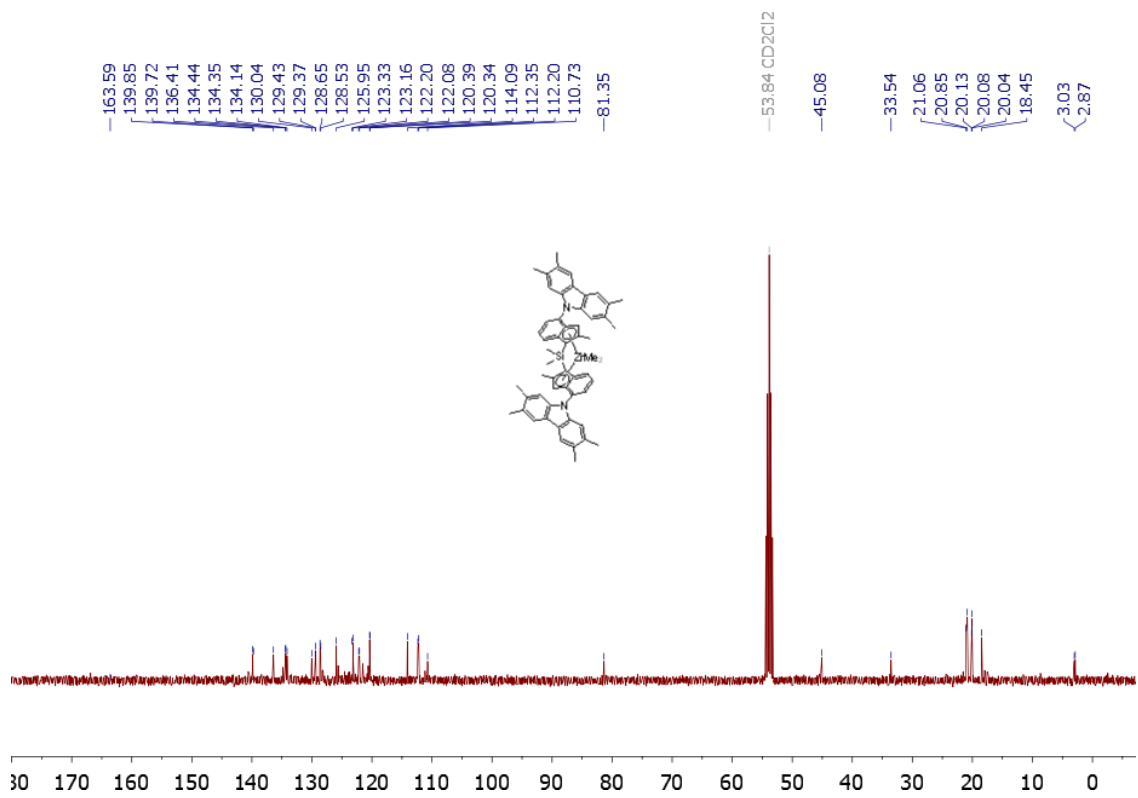

Figure S22. <sup>13</sup>C NMR (100 MHz, CD<sub>2</sub>Cl<sub>2</sub>) spectrum of complex M9.



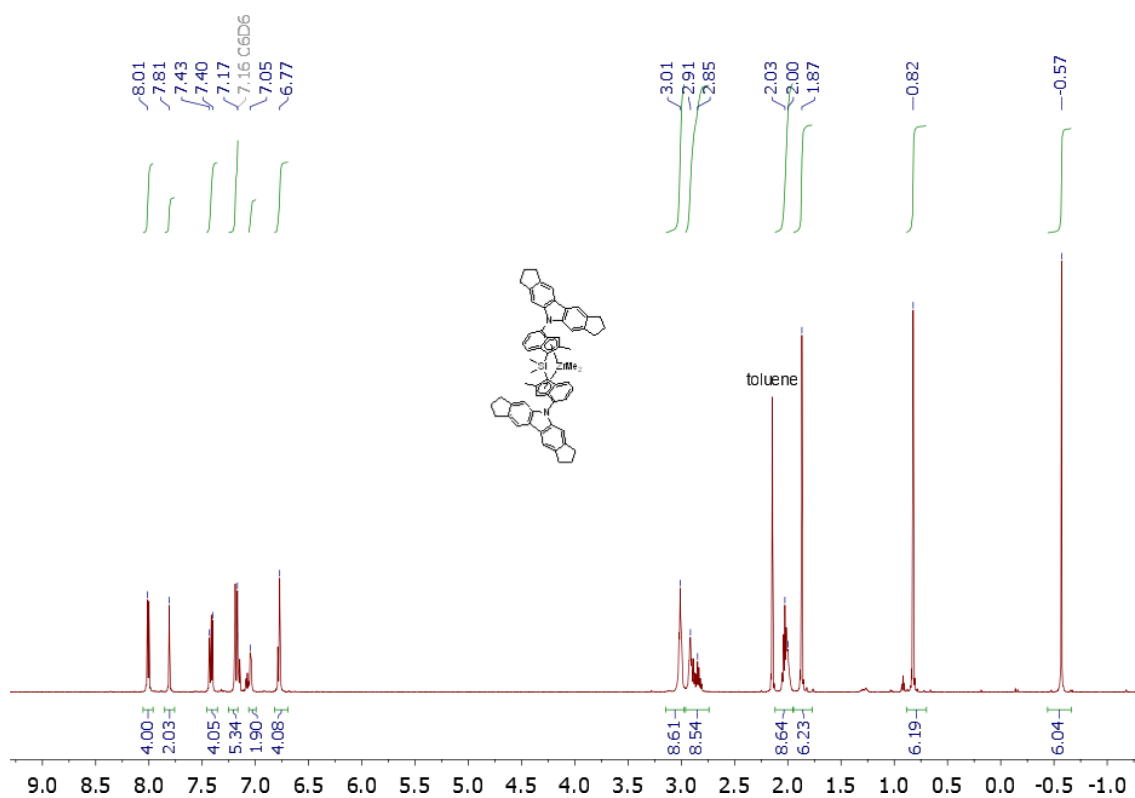

Figure S23.  $^1\text{H}$  NMR (400 MHz,  $\text{C}_6\text{D}_6$ ) spectrum of complex M10.

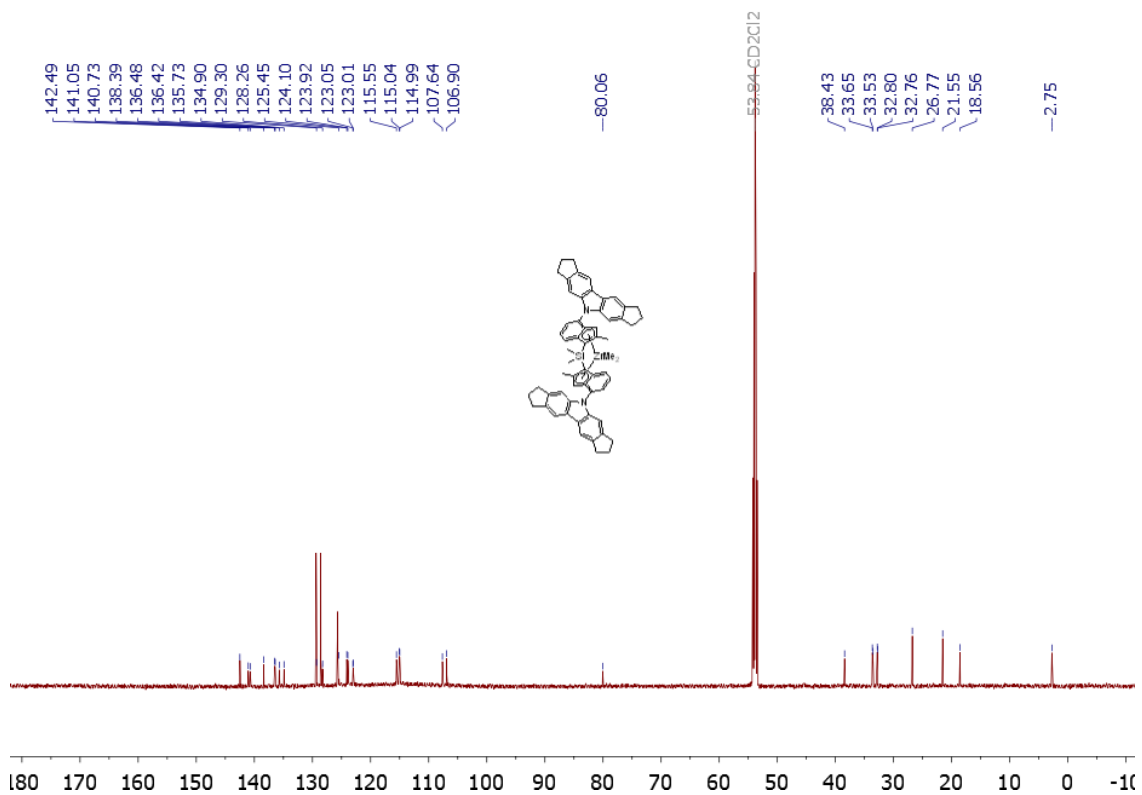

Figure S24.  $^{13}\text{C}$  NMR (100 MHz,  $\text{CD}_2\text{Cl}_2$ ) spectrum of complex M10.

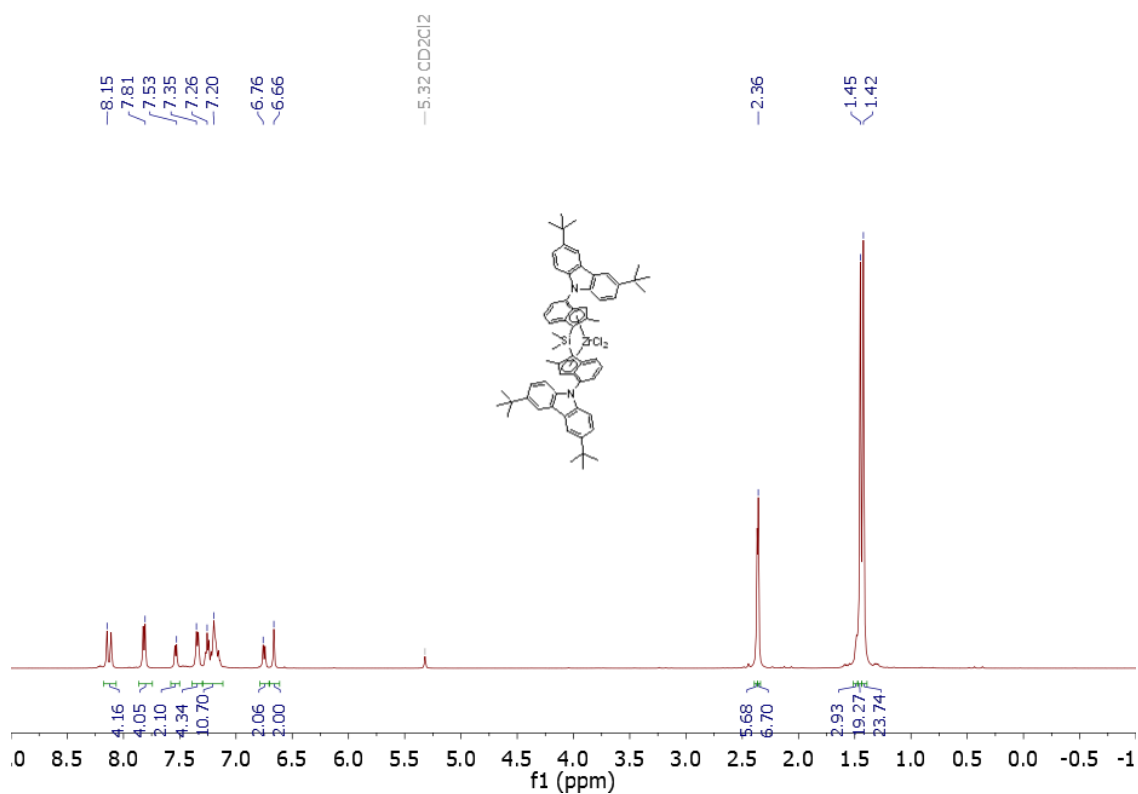

Figure S25. <sup>1</sup>H NMR (400 MHz, CD<sub>2</sub>Cl<sub>2</sub>) spectrum of complex C11.

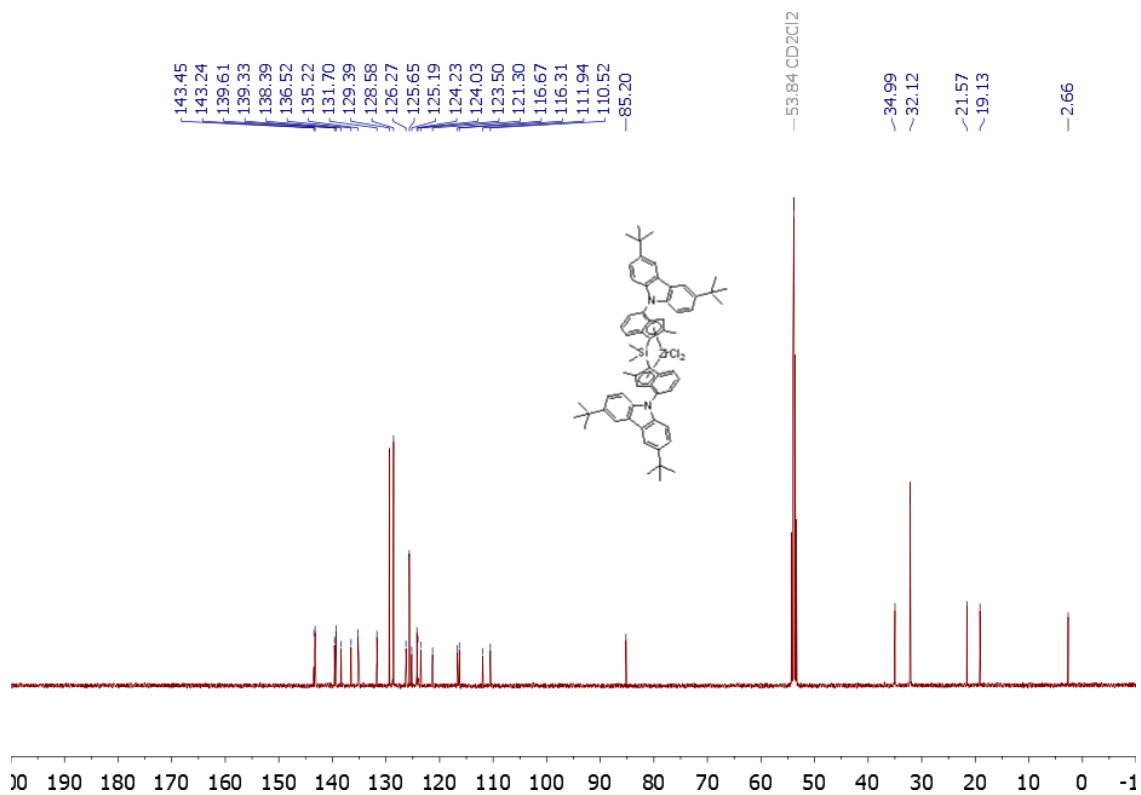

Figure S26. <sup>13</sup>C NMR (100 MHz, CD<sub>2</sub>Cl<sub>2</sub>) spectrum of complex C11.

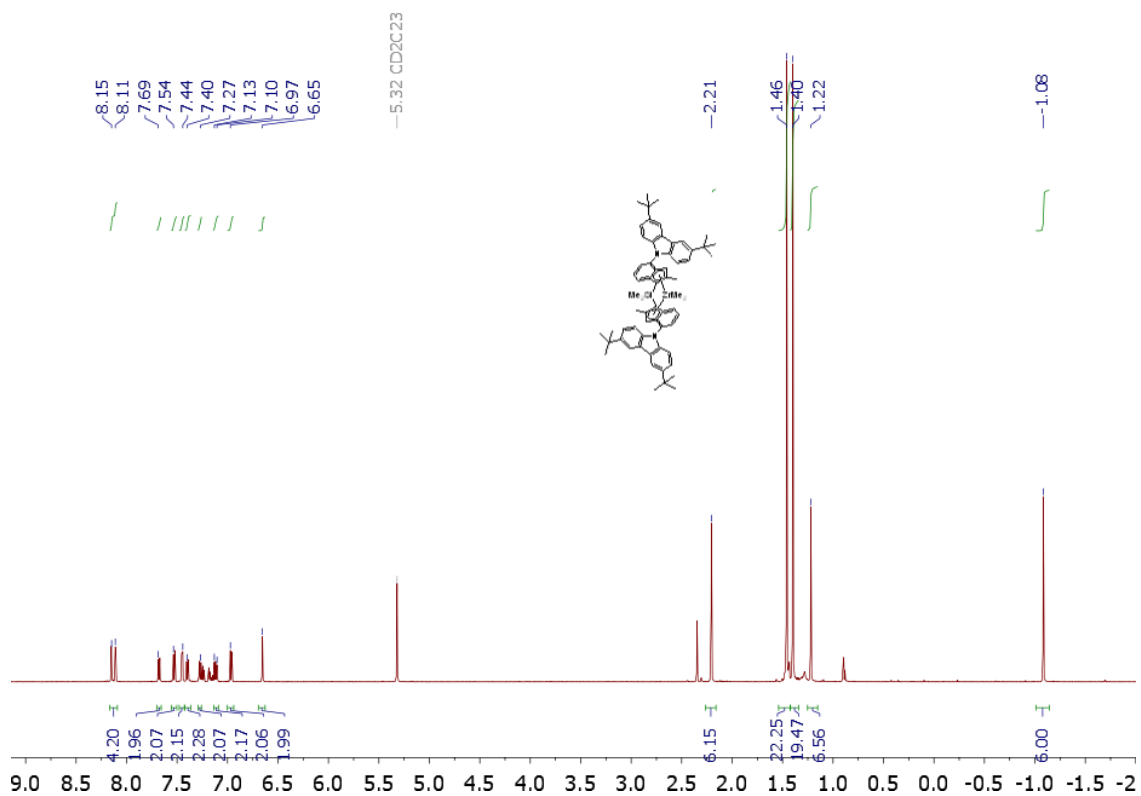

Figure S27.  $^1\text{H}$  NMR (400 MHz,  $\text{CD}_2\text{Cl}_2$ ) spectrum of complex M11.

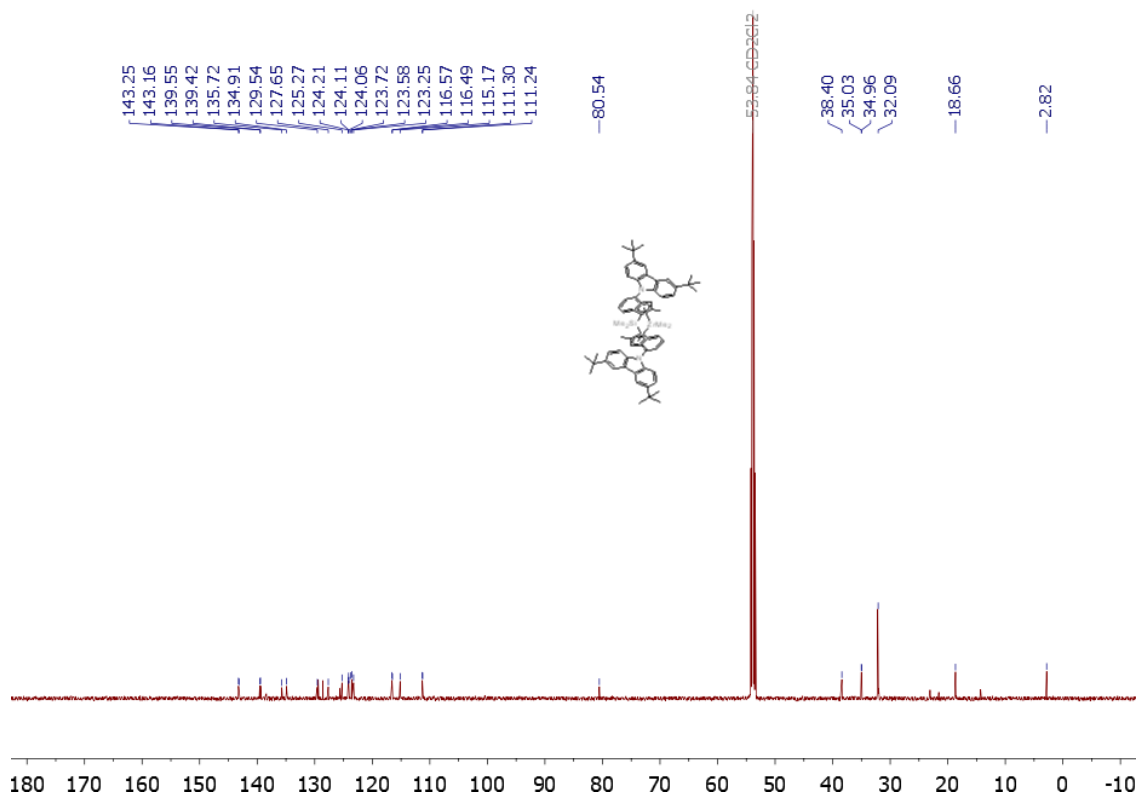

Figure S28.  $^{13}\text{C}$  NMR (100 MHz,  $\text{CD}_2\text{Cl}_2$ ) spectrum of complex M11.

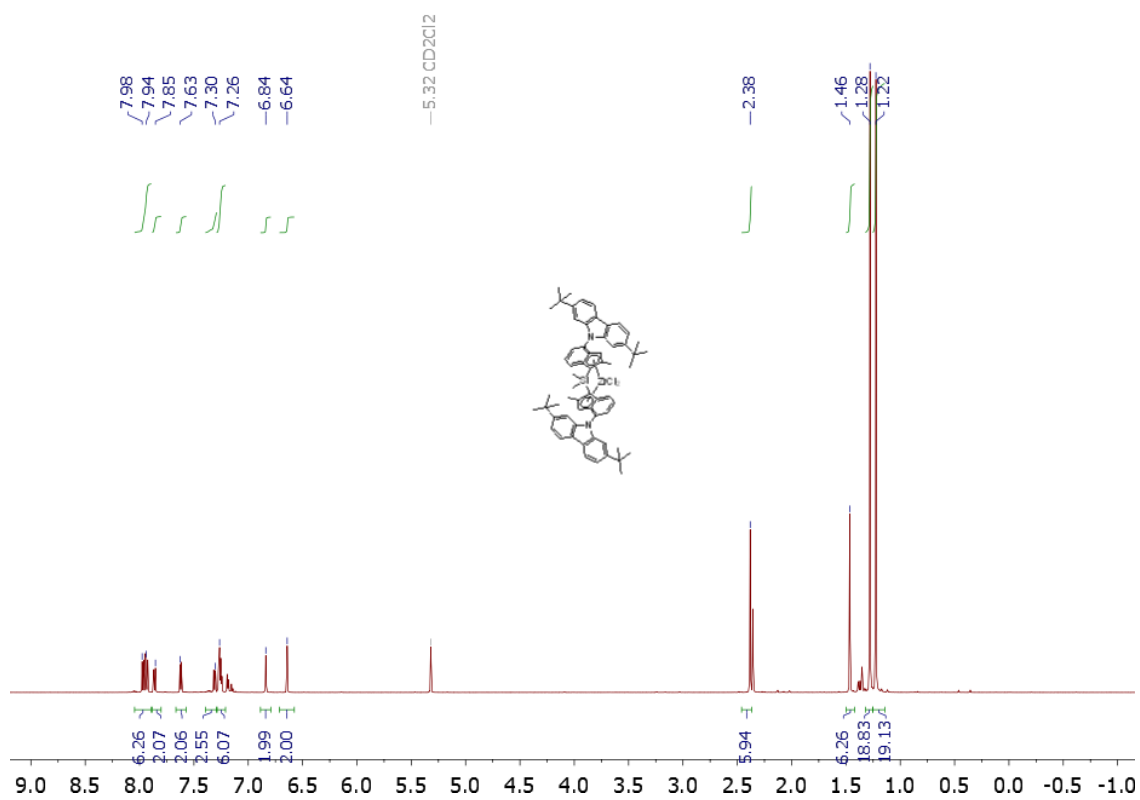

Figure S29.  $^1\text{H}$  NMR (400 MHz,  $\text{CD}_2\text{Cl}_2$ ) spectrum of complex **C12**.

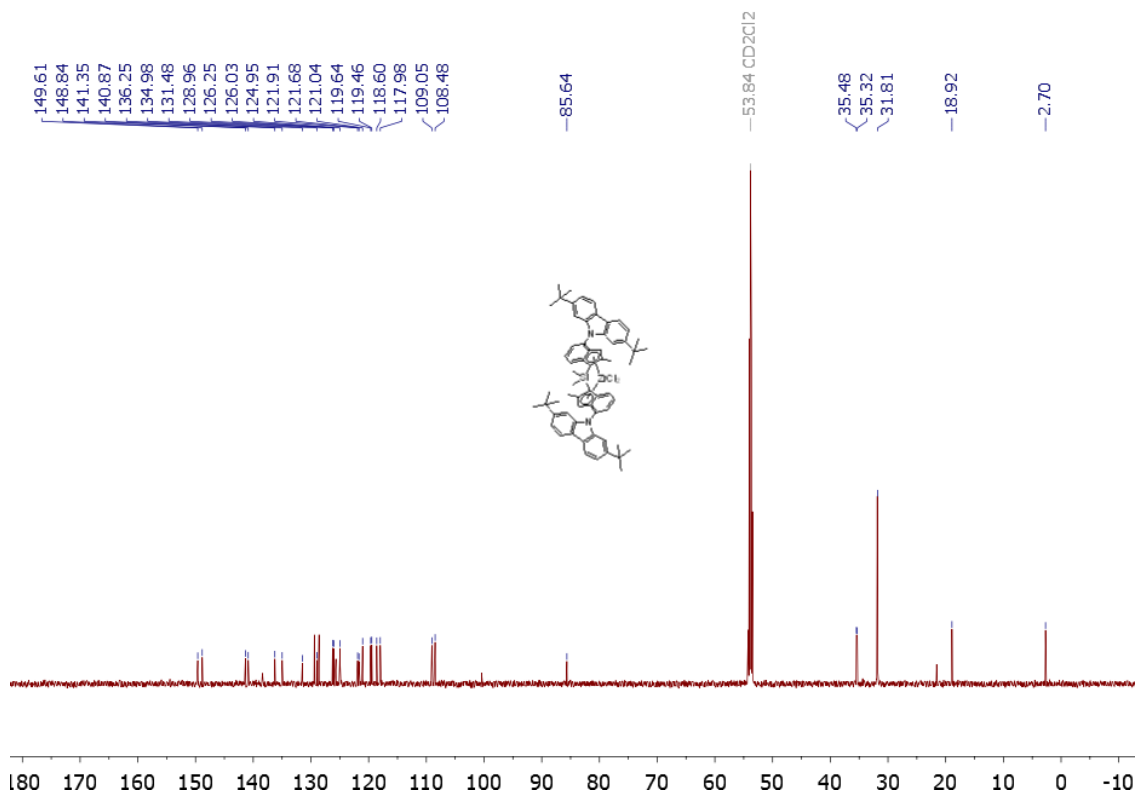

Figure S30.  $^{13}\text{C}$  NMR (100 MHz,  $\text{CD}_2\text{Cl}_2$ ) spectrum of complex **C12**.

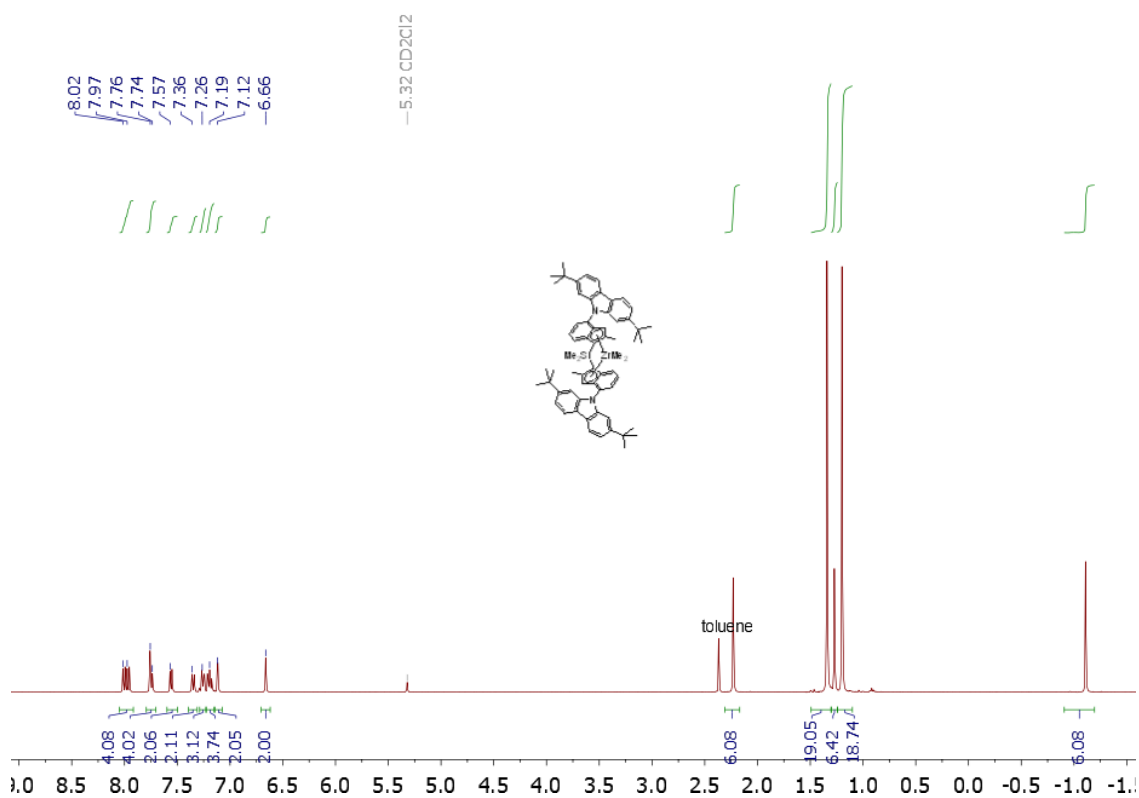

Figure S31. <sup>1</sup>H NMR (400 MHz, CD<sub>2</sub>Cl<sub>2</sub>) spectrum of complex M12.

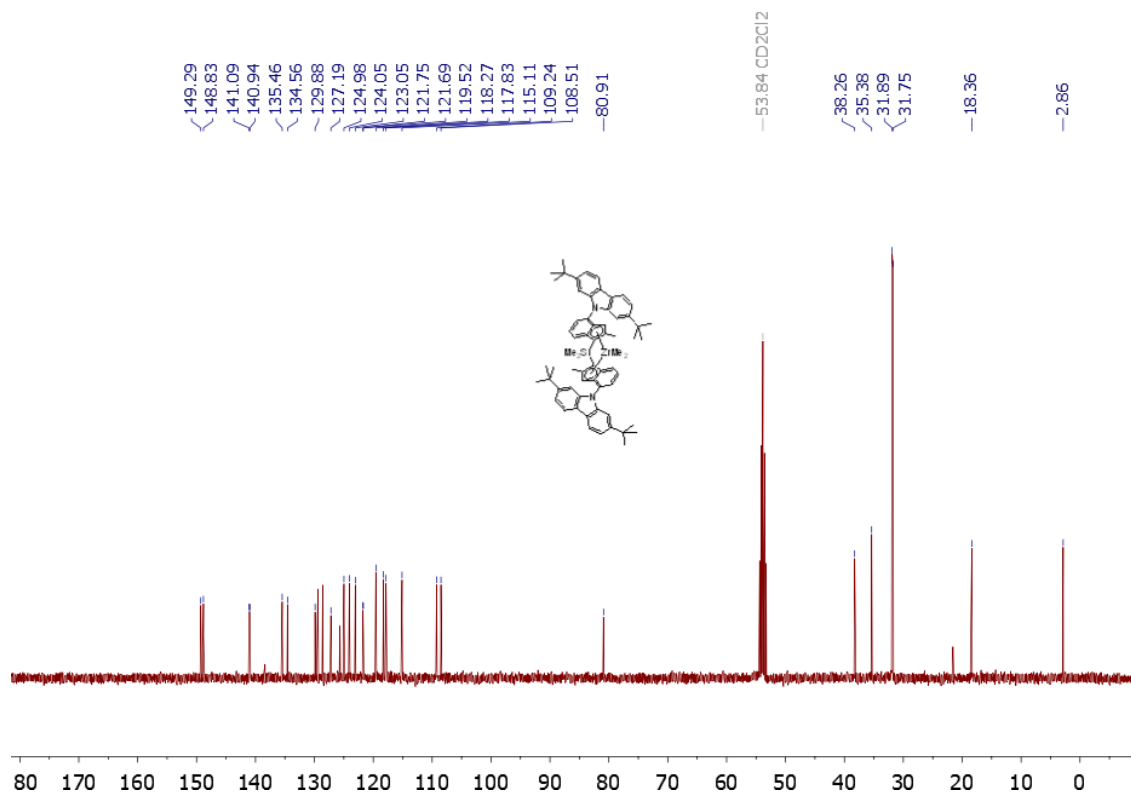

Figure S32. <sup>13</sup>C NMR (100 MHz, CD<sub>2</sub>Cl<sub>2</sub>) spectrum of complex M12.

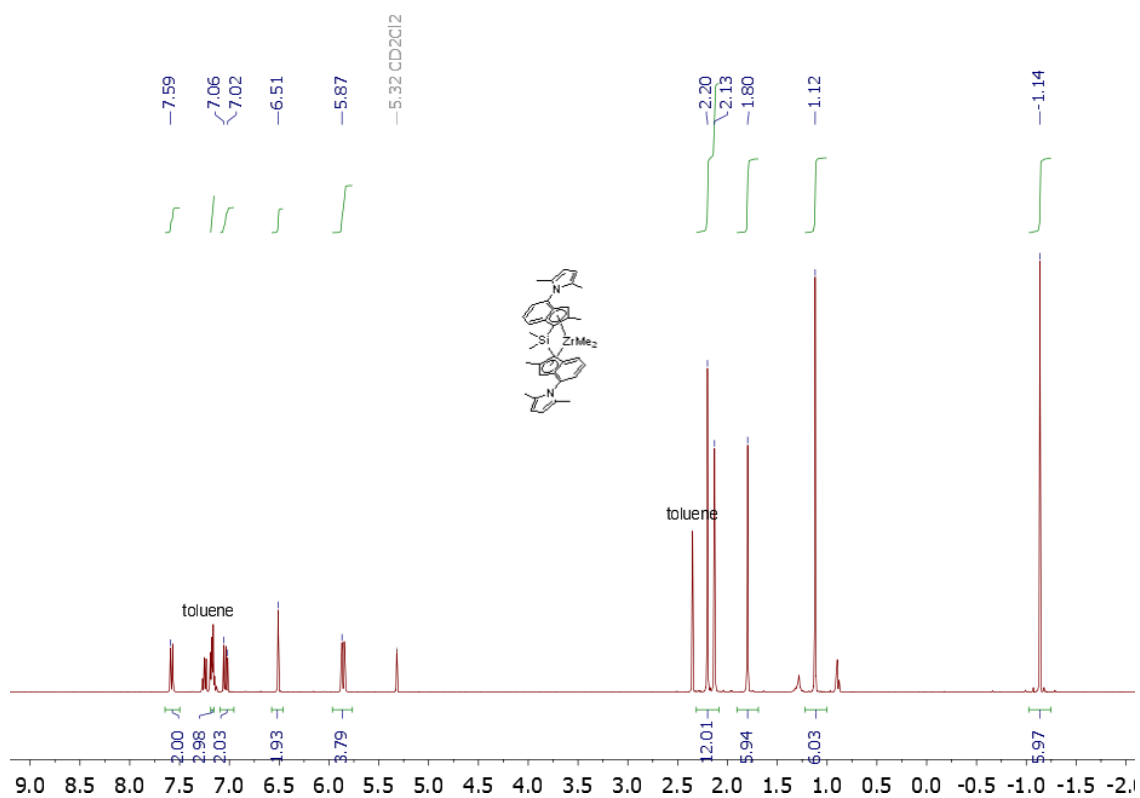

Figure S33. <sup>1</sup>H NMR (400 MHz, CD<sub>2</sub>Cl<sub>2</sub>) spectrum of complex M13.

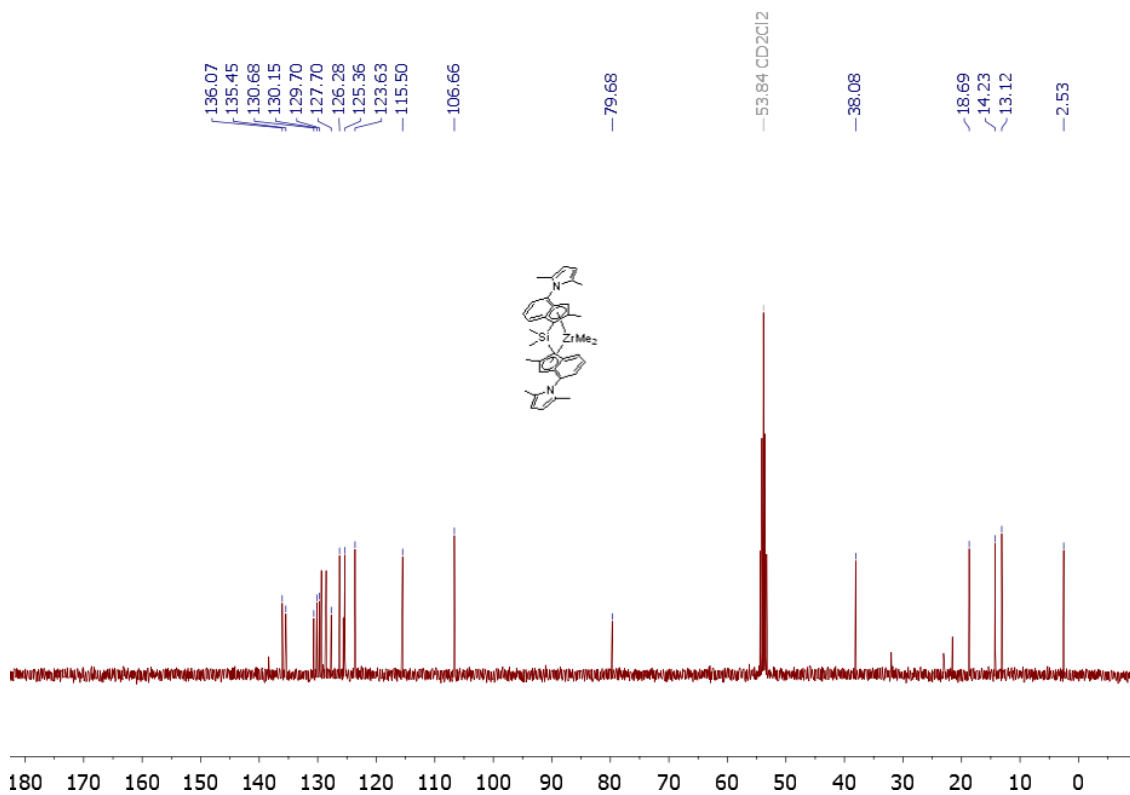

Figure S34. <sup>13</sup>C NMR (100 MHz, CD<sub>2</sub>Cl<sub>2</sub>) spectrum of complex M13.

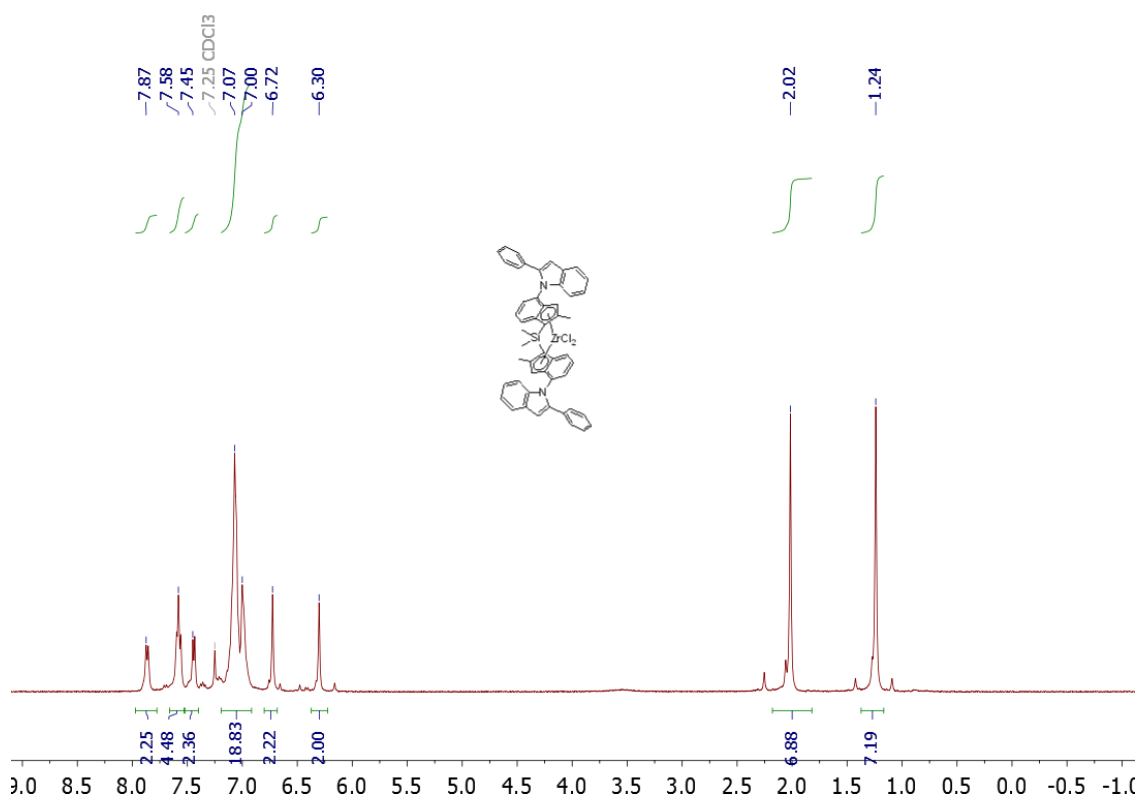

Figure S35.  $^1\text{H}$  NMR (400 MHz,  $\text{CDCl}_3$ ) spectrum of complex C15.

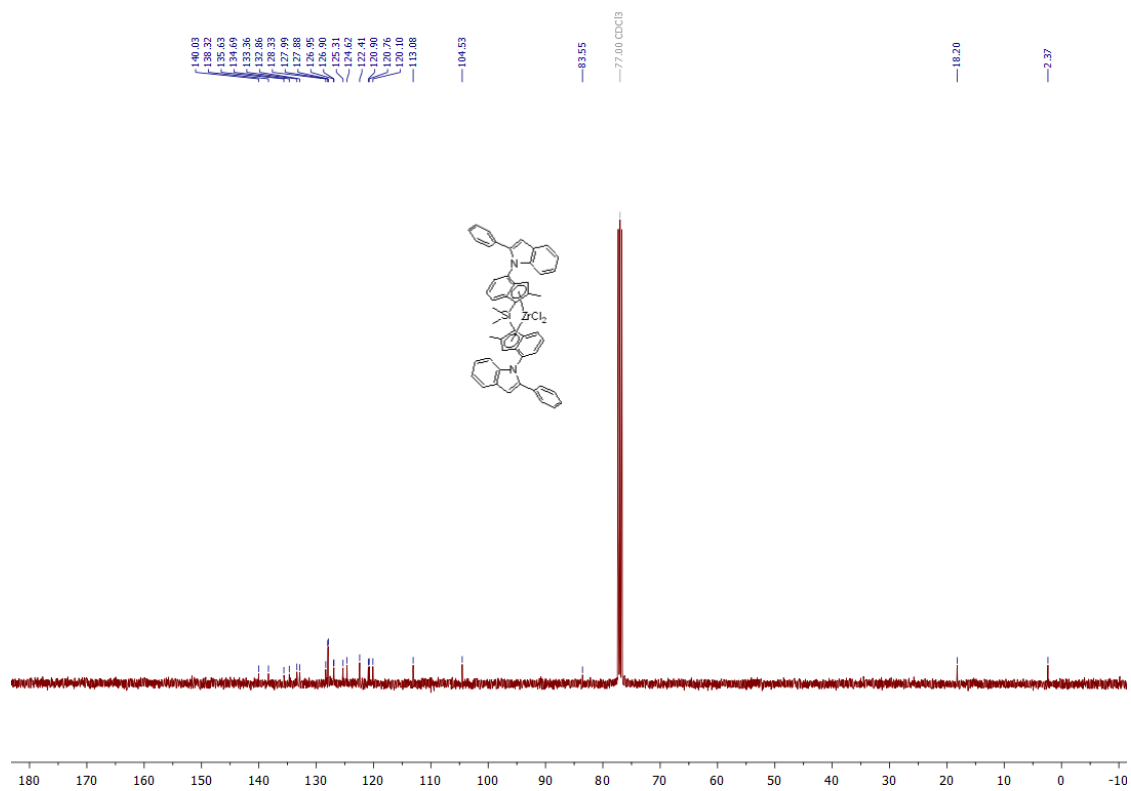

Figure S36.  $^{13}\text{C}$  NMR (100 MHz,  $\text{CDCl}_3$ ) spectrum of complex C15.

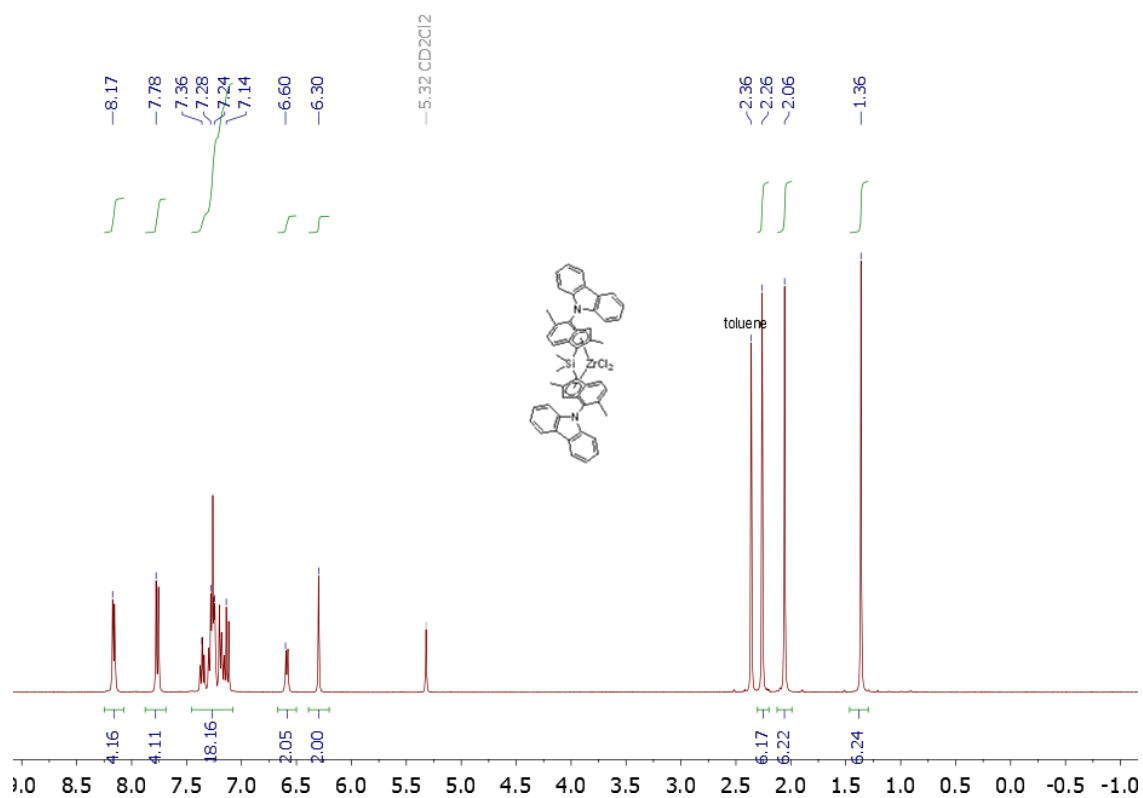

Figure S37. <sup>1</sup>H NMR (400 MHz, CD<sub>2</sub>Cl<sub>2</sub>) spectrum of complex C16.

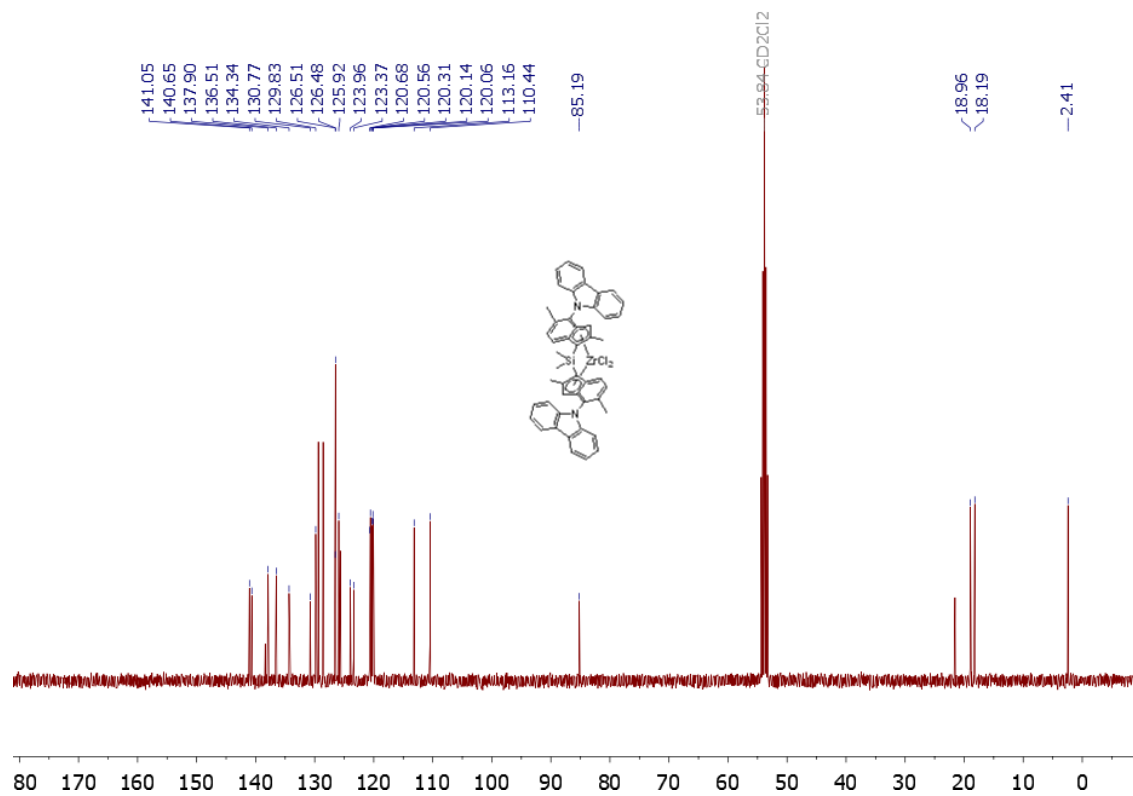

Figure S38. <sup>13</sup>C NMR (100 MHz, CD<sub>2</sub>Cl<sub>2</sub>) spectrum of complex C16.



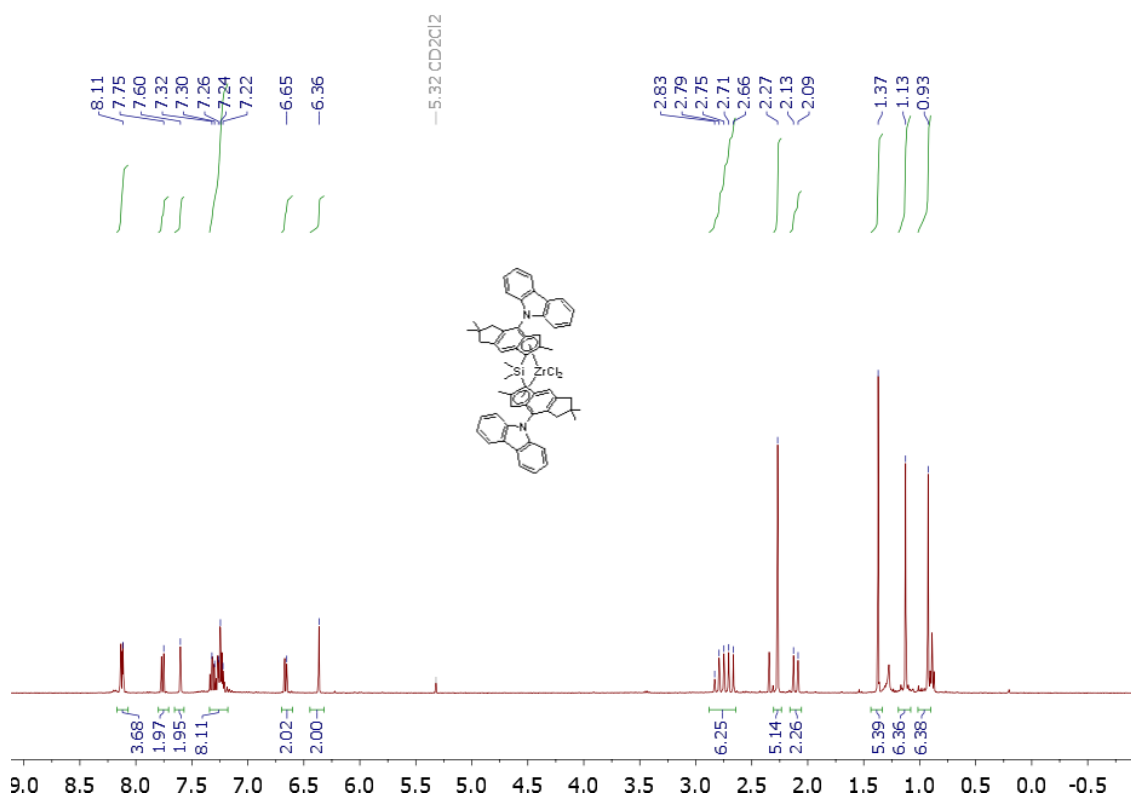

Figure S39.  $^1\text{H}$  NMR (400 MHz,  $\text{CD}_2\text{Cl}_2$ ) spectrum of complex C17.

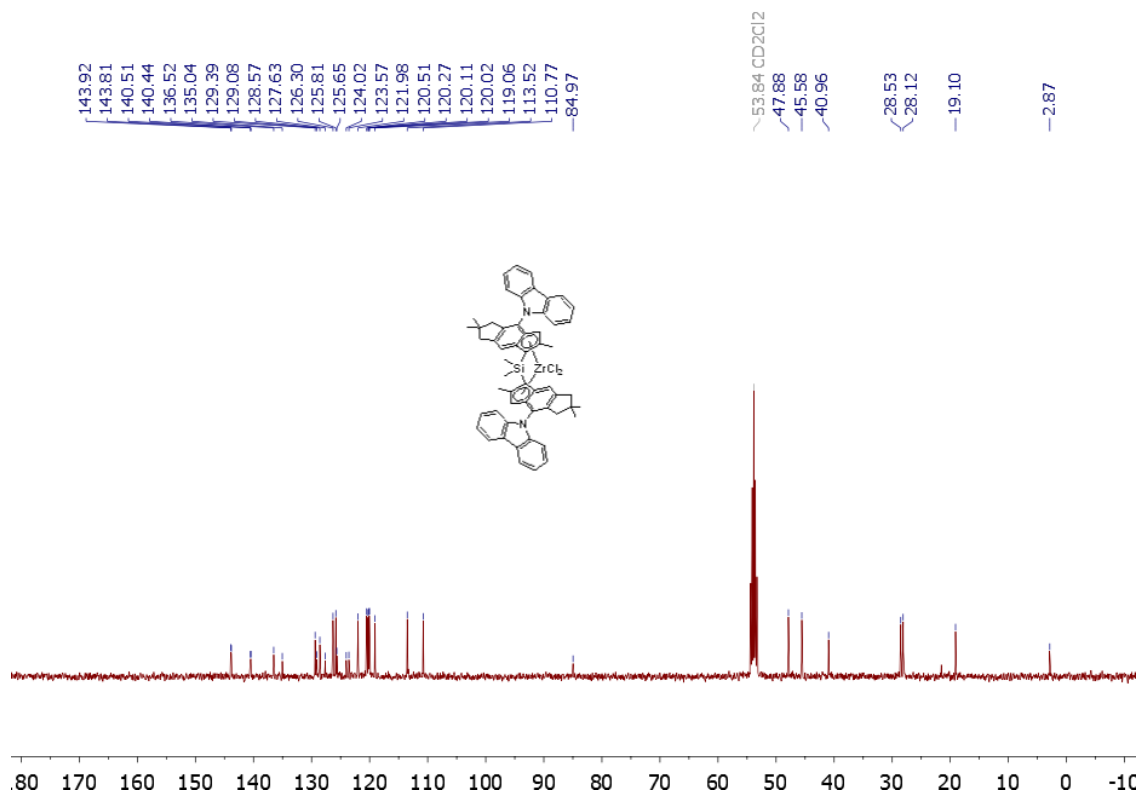

Figure S40.  $^{13}\text{C}$  NMR (100 MHz,  $\text{CD}_2\text{Cl}_2$ ) spectrum of complex C17.

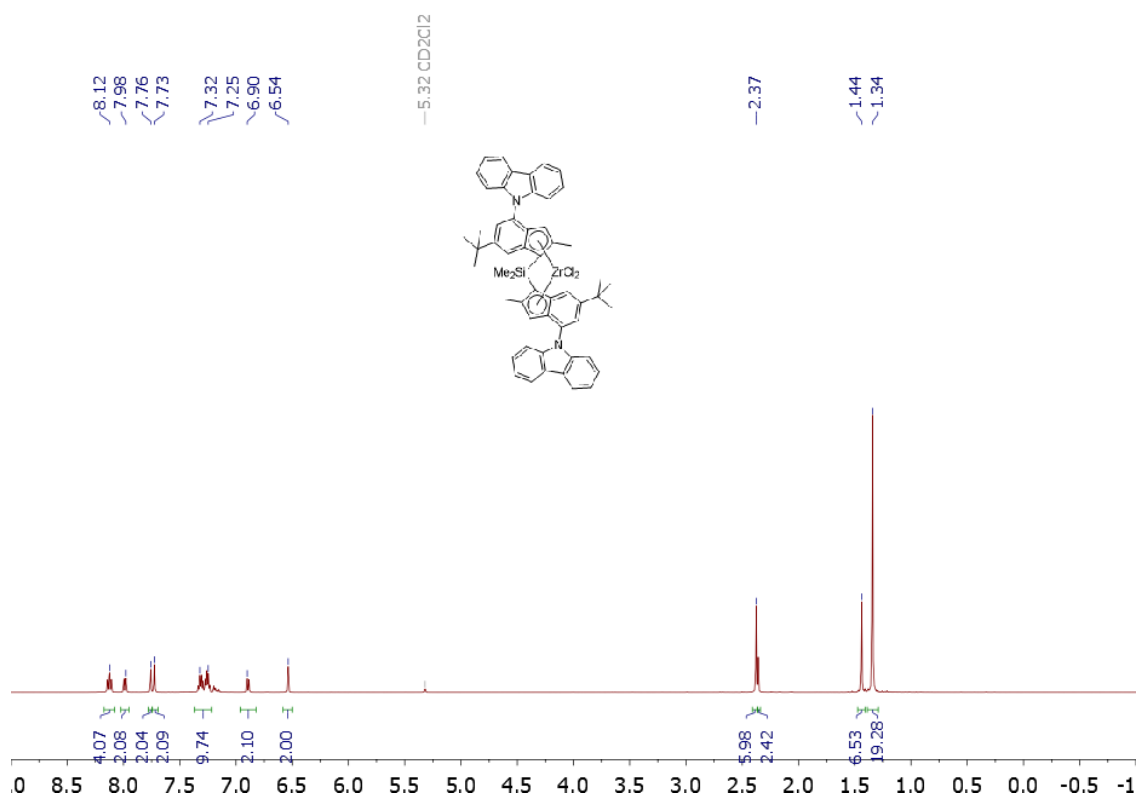

**Figure S41.** <sup>1</sup>H NMR (400 MHz, CD<sub>2</sub>Cl<sub>2</sub>) spectrum of complex **C18**.

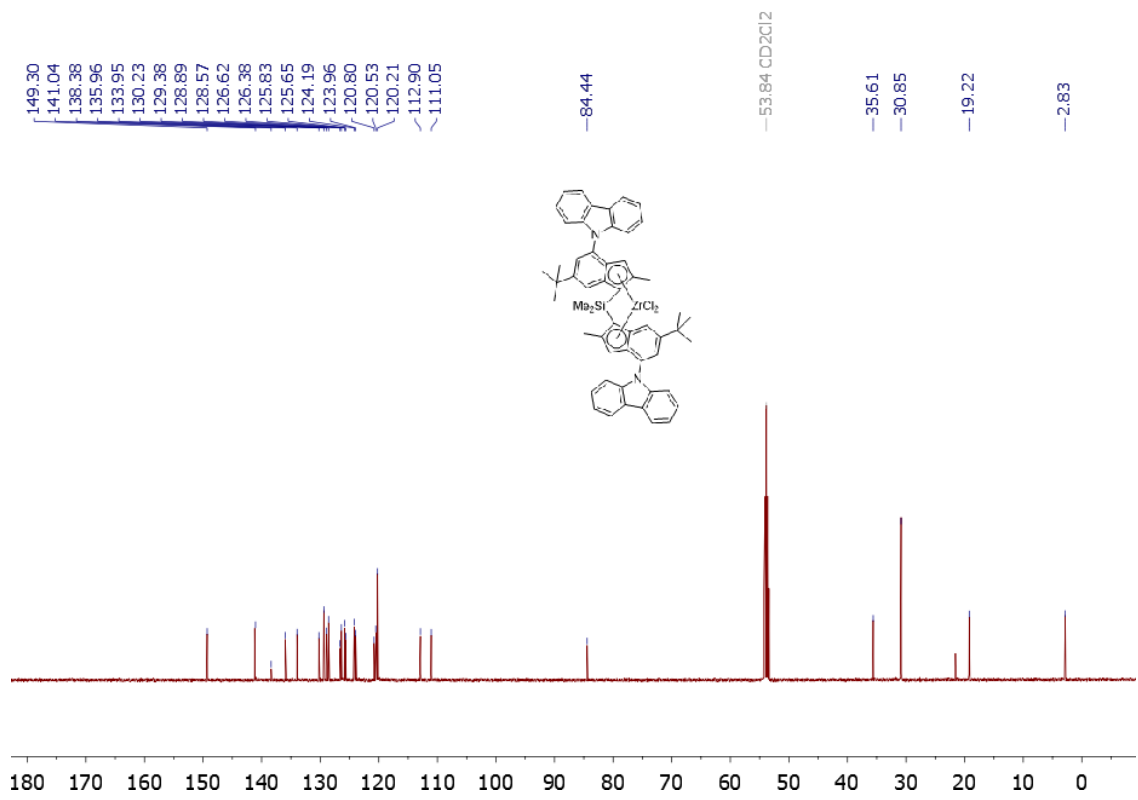

**Figure S42.** <sup>13</sup>C NMR (100 MHz, CD<sub>2</sub>Cl<sub>2</sub>) spectrum of complex **C18**.

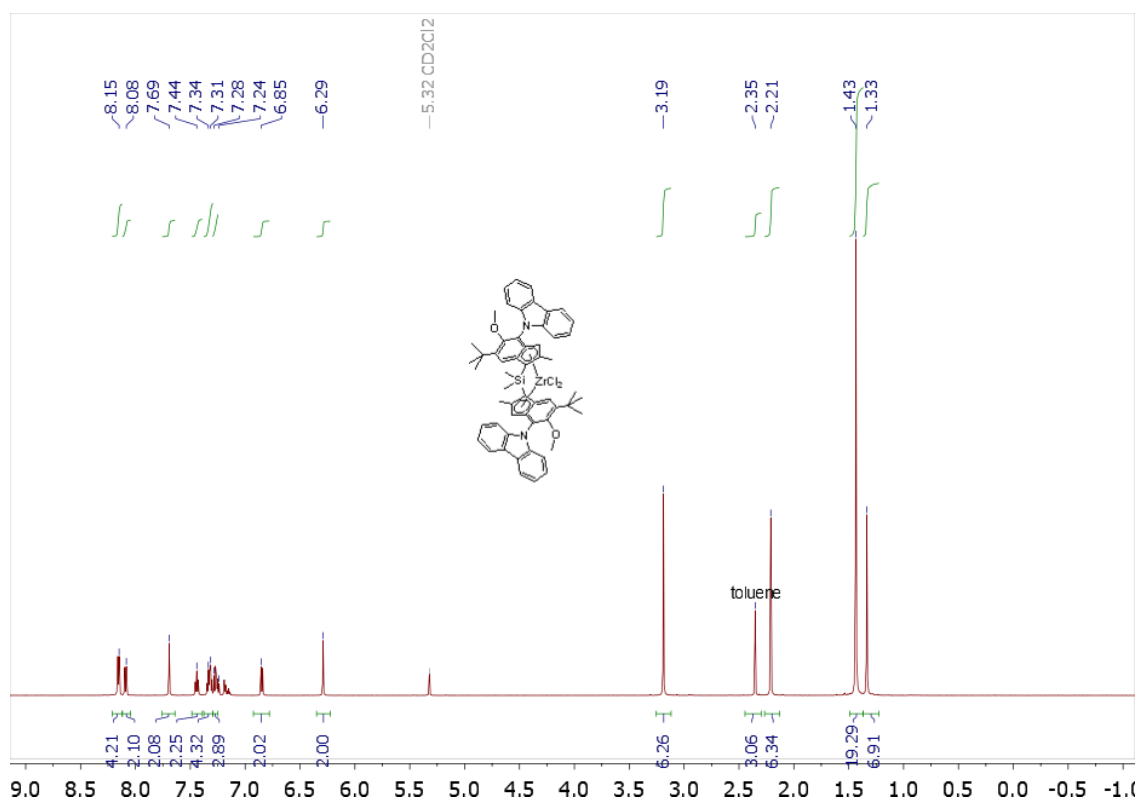

Figure S43.  $^1\text{H}$  NMR (400 MHz,  $\text{CD}_2\text{Cl}_2$ ) spectrum of complex C19.

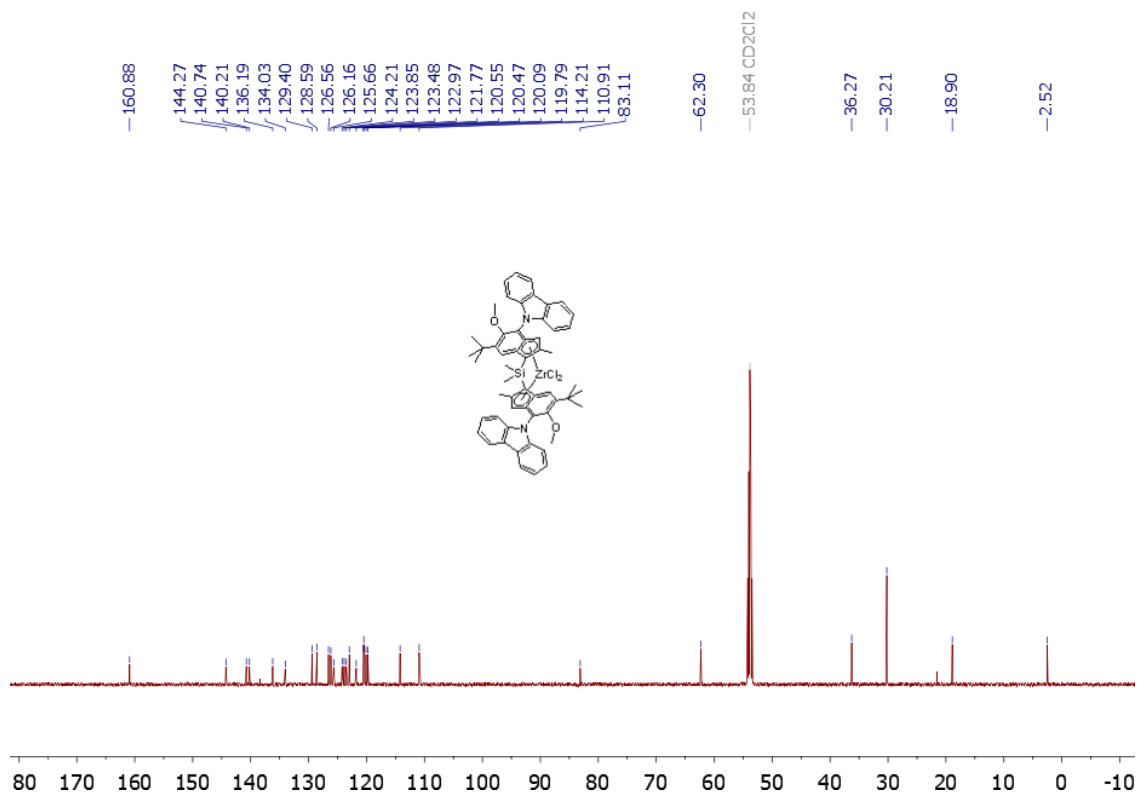

Figure S44.  $^{13}\text{C}$  NMR (100 MHz,  $\text{CD}_2\text{Cl}_2$ ) spectrum of complex C19.

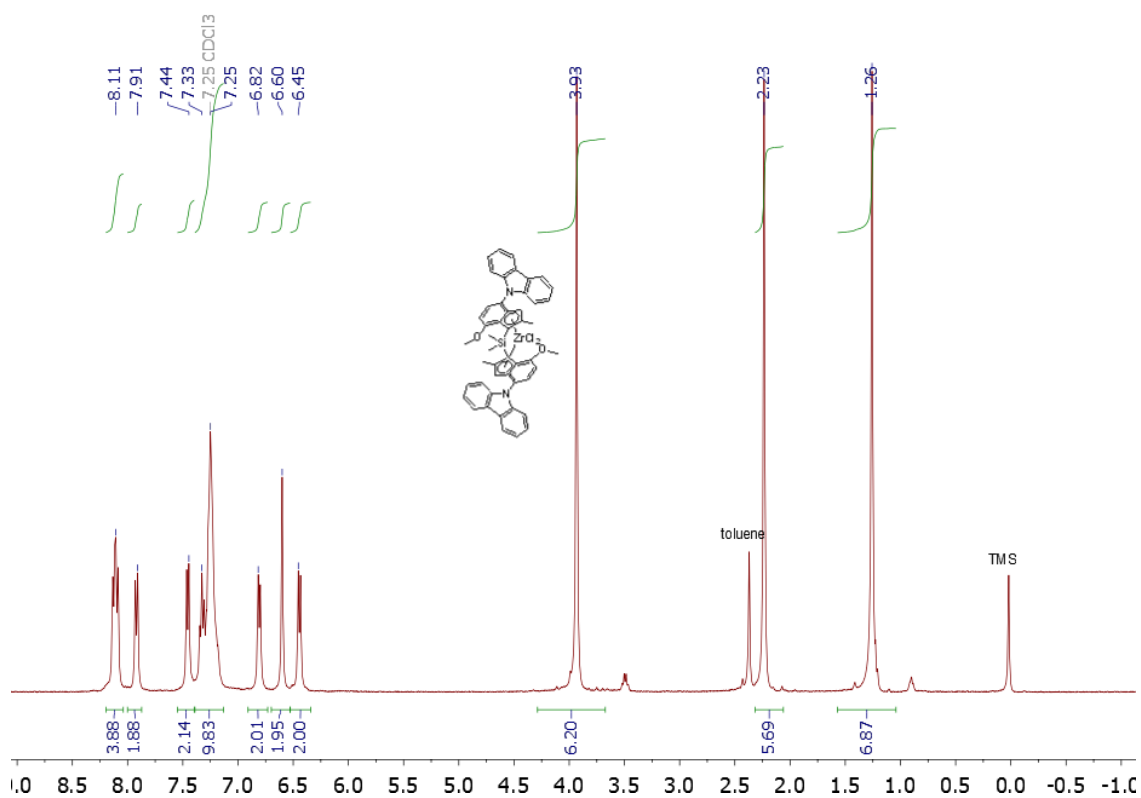

Figure S45.  $^1\text{H}$  NMR (400 MHz,  $\text{CDCl}_3$ ) spectrum of complex C20.

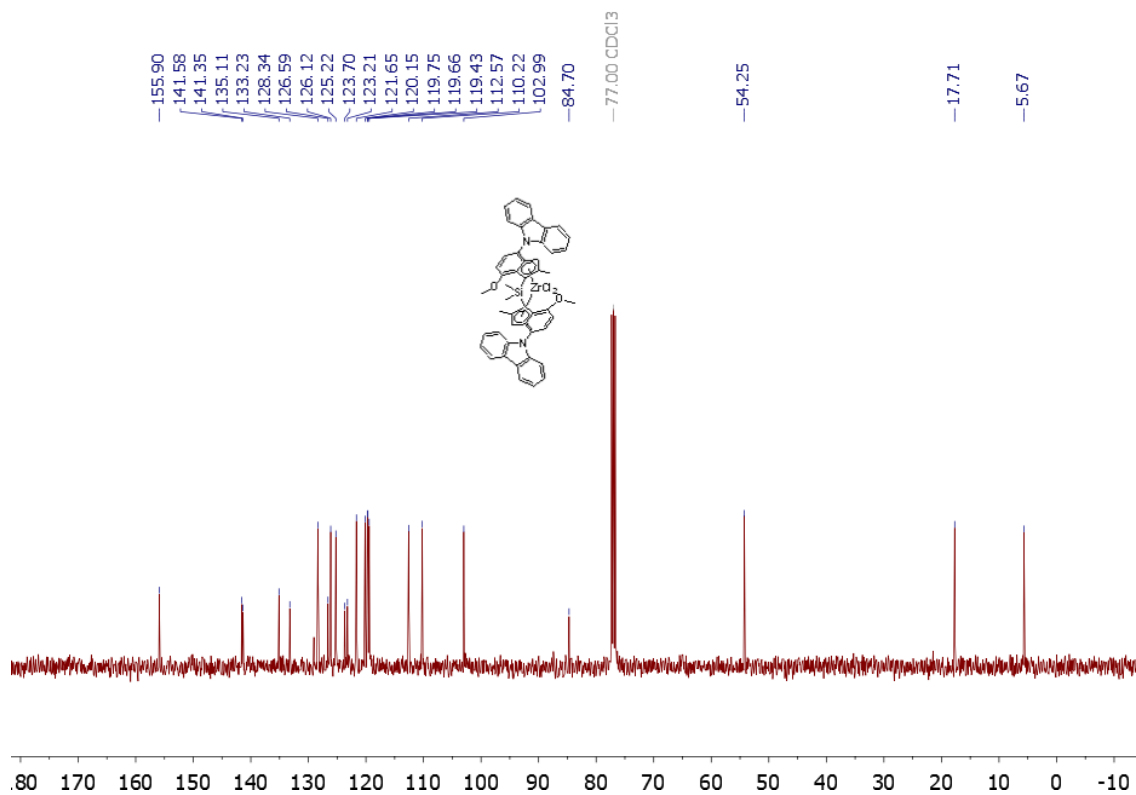

Figure S46.  $^{13}\text{C}$  NMR (100 MHz,  $\text{CDCl}_3$ ) spectrum of complex C20.

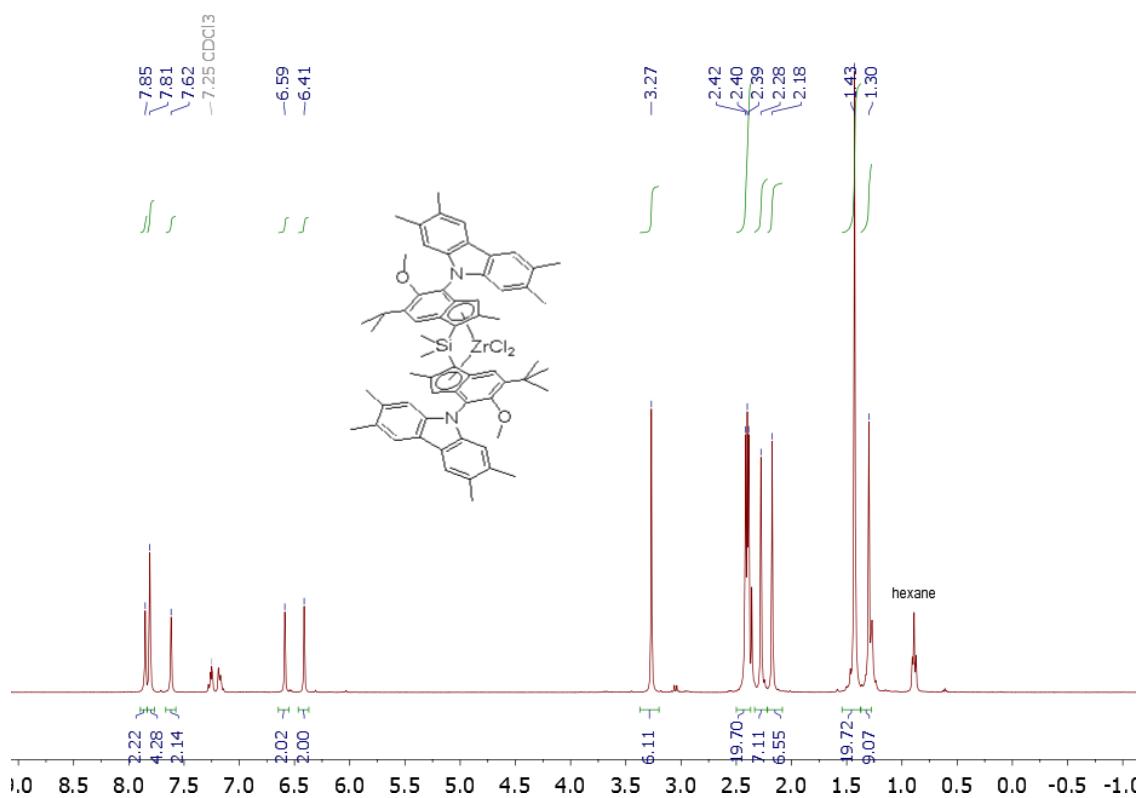

Figure S47.  $^1\text{H}$  NMR (400 MHz,  $\text{CDCl}_3$ ) spectrum of complex C21.

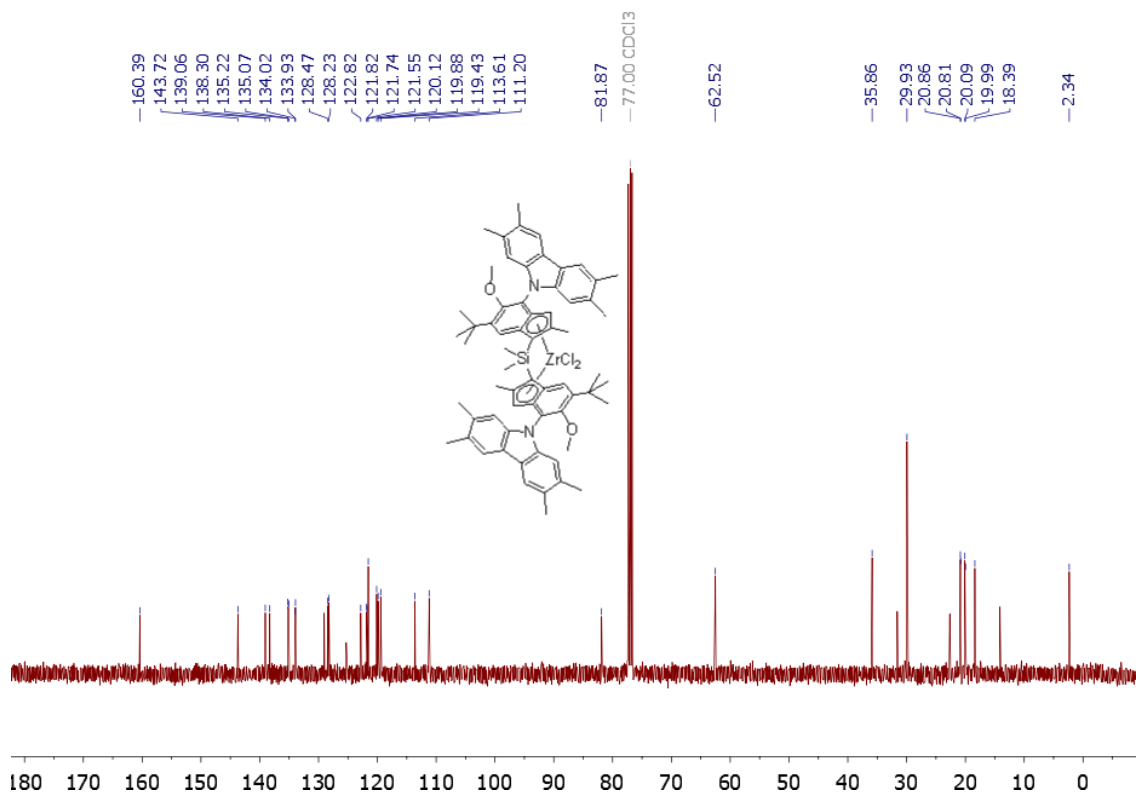

Figure S48.  $^{13}\text{C}$  NMR (100 MHz,  $\text{CDCl}_3$ ) spectrum of complex C21.

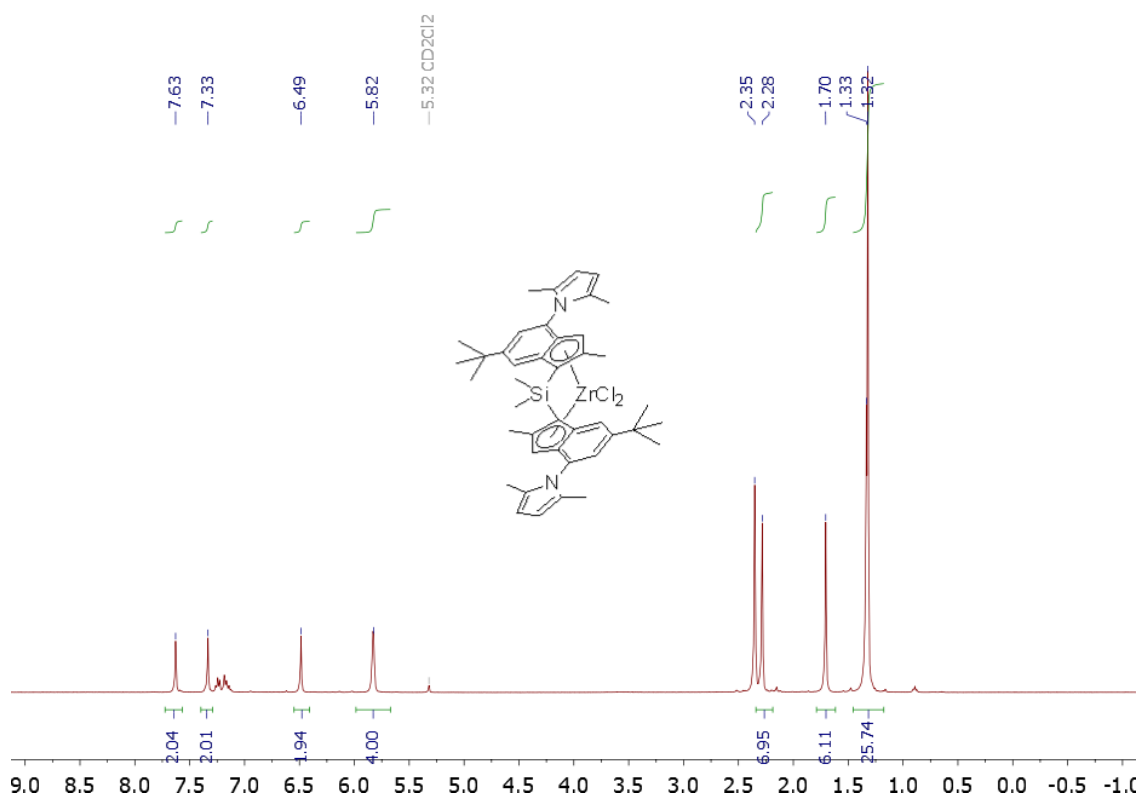

Figure S49. <sup>1</sup>H NMR (400 MHz, CD<sub>2</sub>Cl<sub>2</sub>) spectrum of complex C22.

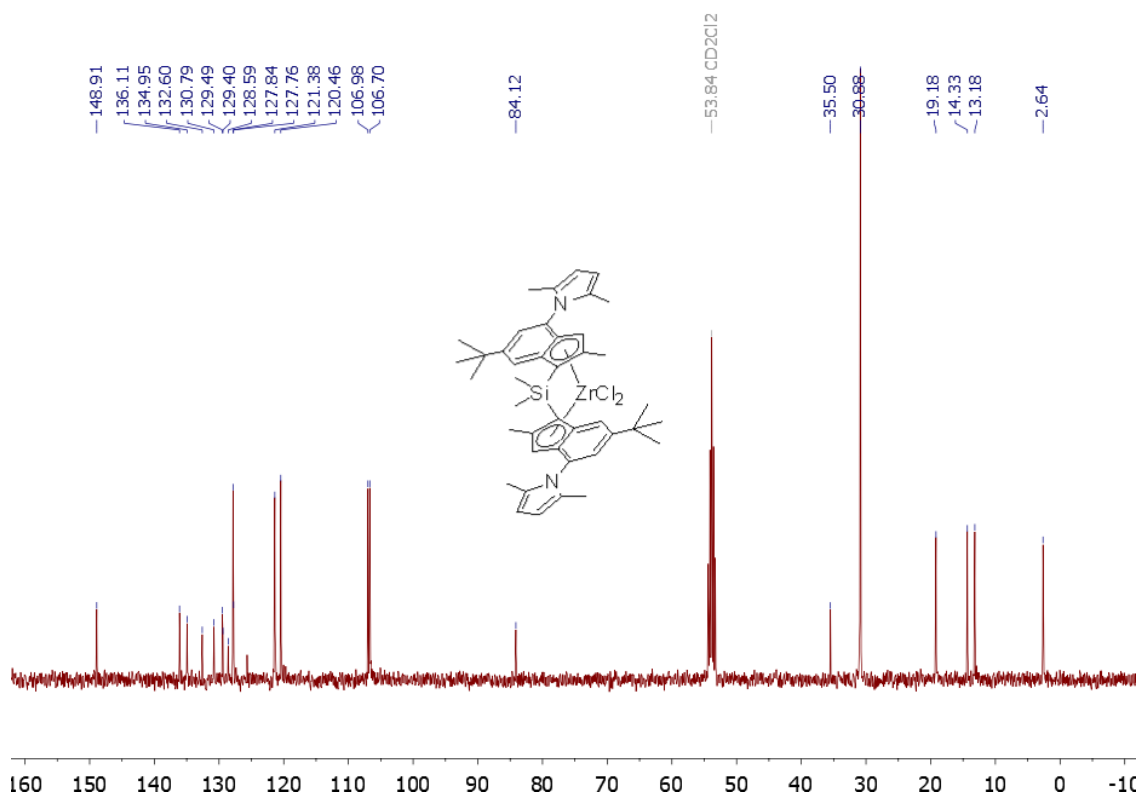

Figure S50. <sup>13</sup>C NMR (100 MHz, CDCl<sub>3</sub>) spectrum of complex C22.

<sup>13</sup>C NMR SPECTRA OF SELECTED POLYPROPYLENE SAMPLES

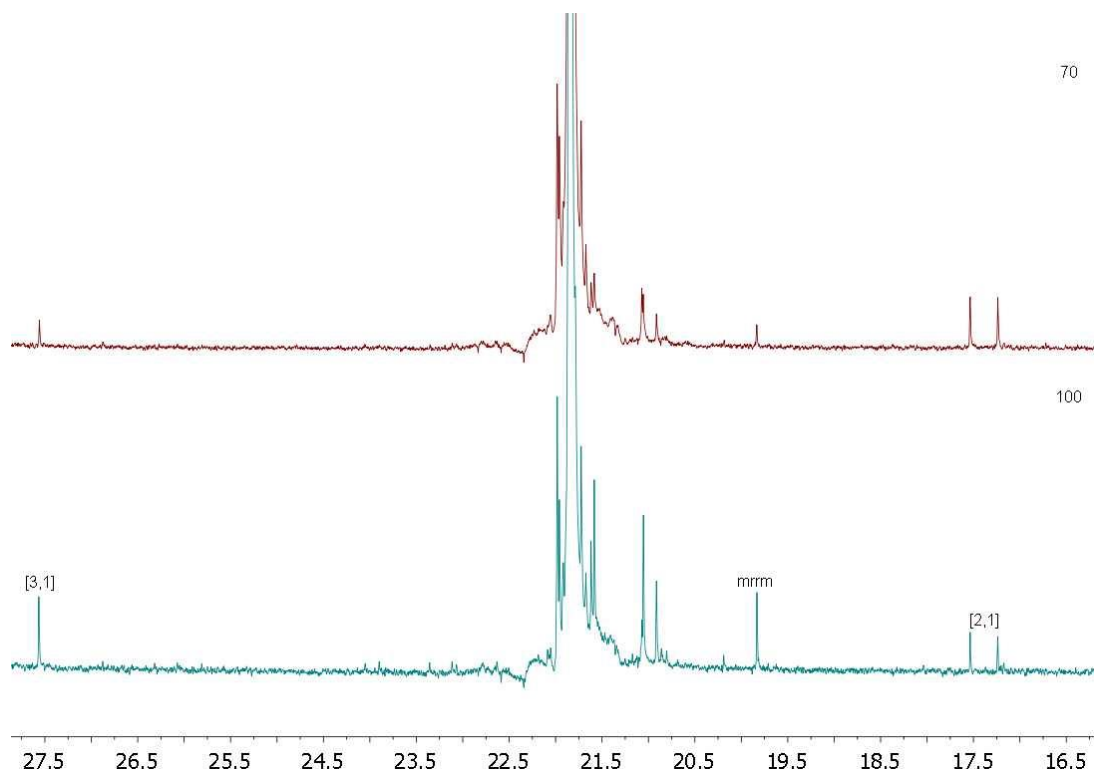

**Figure S51.** <sup>13</sup>C NMR (150 MHz, tetrachloroethane-d<sub>2</sub>, 120°C) spectra of iPP obtained with **MII/AB** (Table 6) at 70°C (top) and 100°C (bottom).

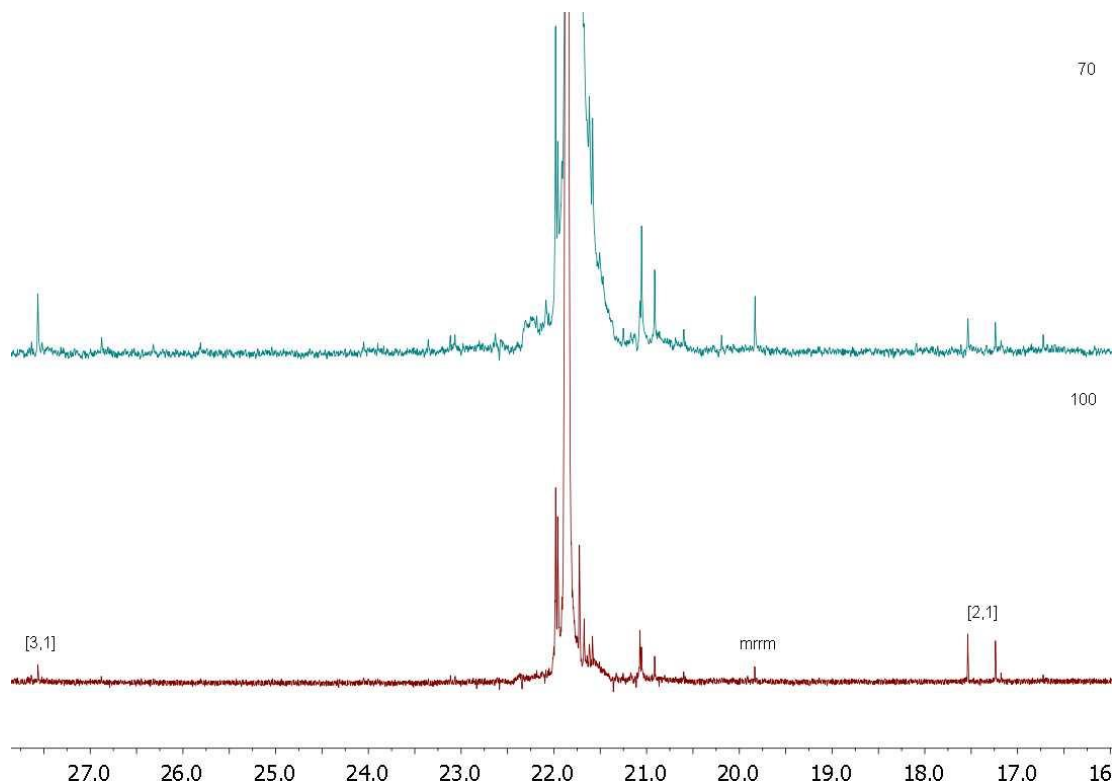

**Figure S52.** <sup>13</sup>C NMR (150 MHz, tetrachloroethane-d<sub>2</sub>, 120°C) spectra of iPP obtained with **M5/AB** (Table 6) at 70°C (top) and 100°C (bottom).

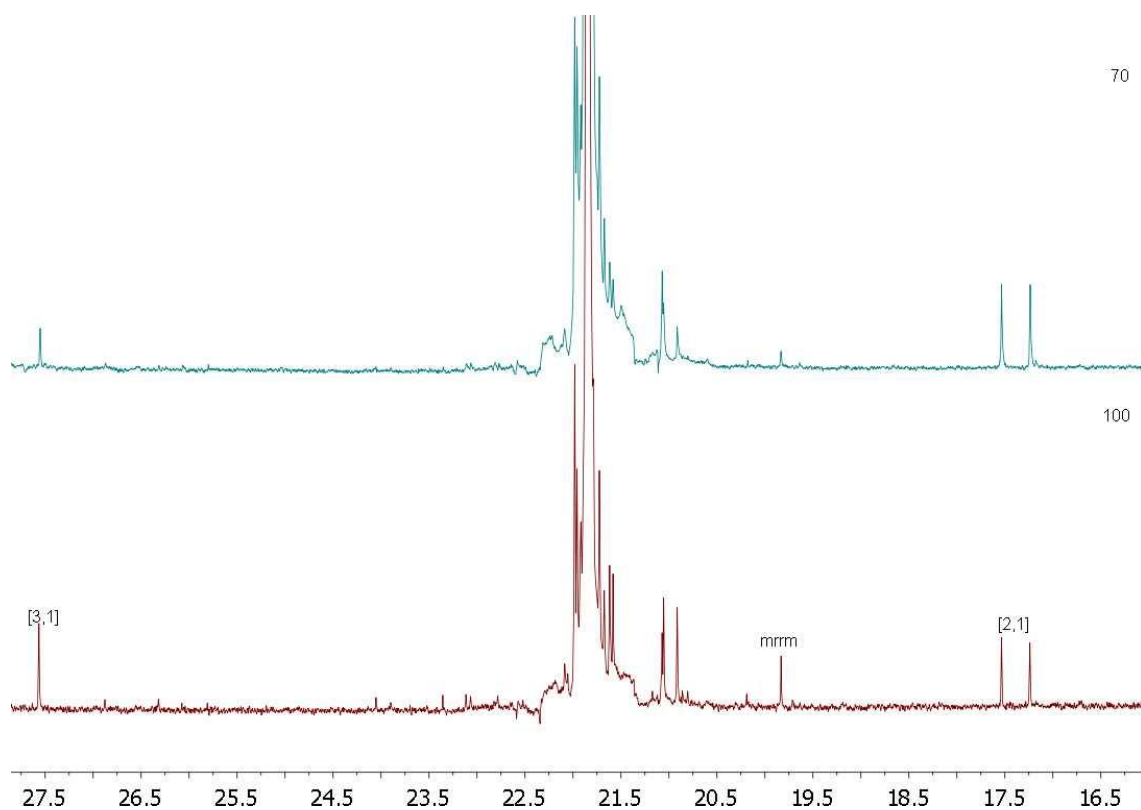

**Figure S53.**  $^{13}\text{C}$  NMR (150 MHz, tetrachloroethane- $d_2$ ,  $120^\circ\text{C}$ ) spectra of iPP obtained with **M8/AB** (Table 6) at  $70^\circ\text{C}$  (top) and  $100^\circ\text{C}$  (bottom).

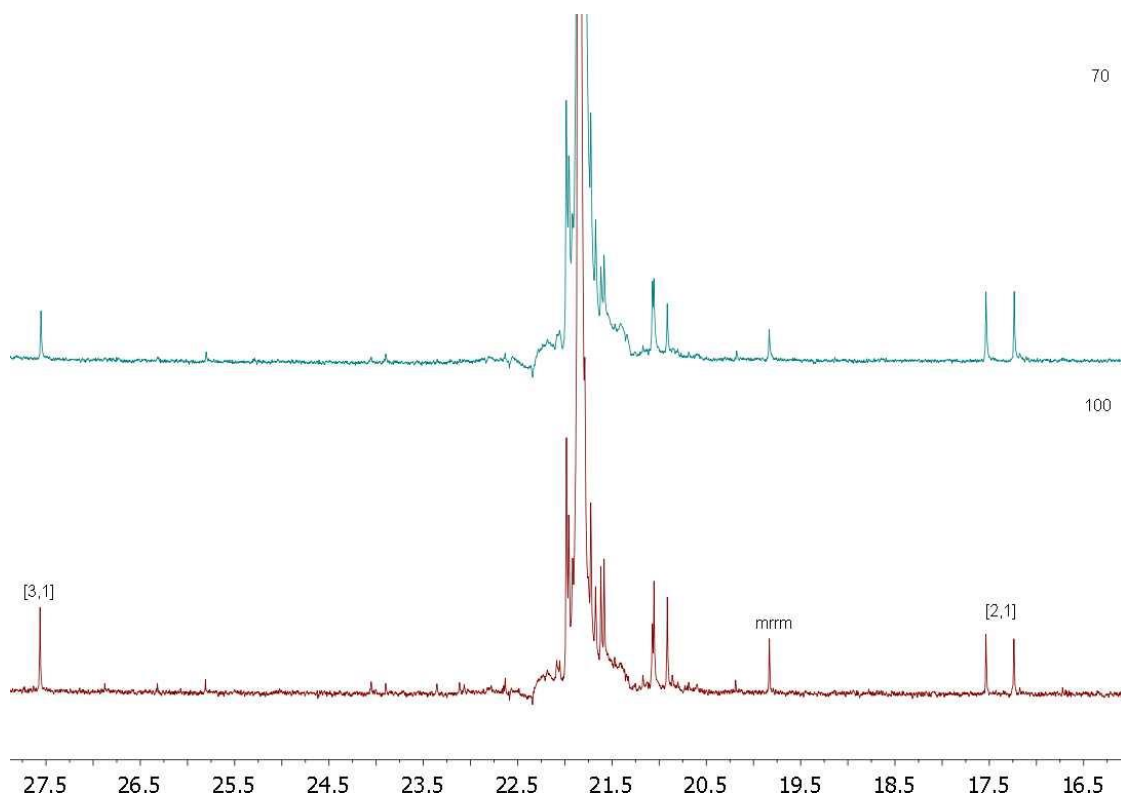

**Figure S54.**  $^{13}\text{C}$  NMR (150 MHz, tetrachloroethane- $d_2$ ,  $120^\circ\text{C}$ ) spectra of iPP obtained with **M9/AB** (Table 6) at  $70^\circ\text{C}$  (top) and  $100^\circ\text{C}$  (bottom).



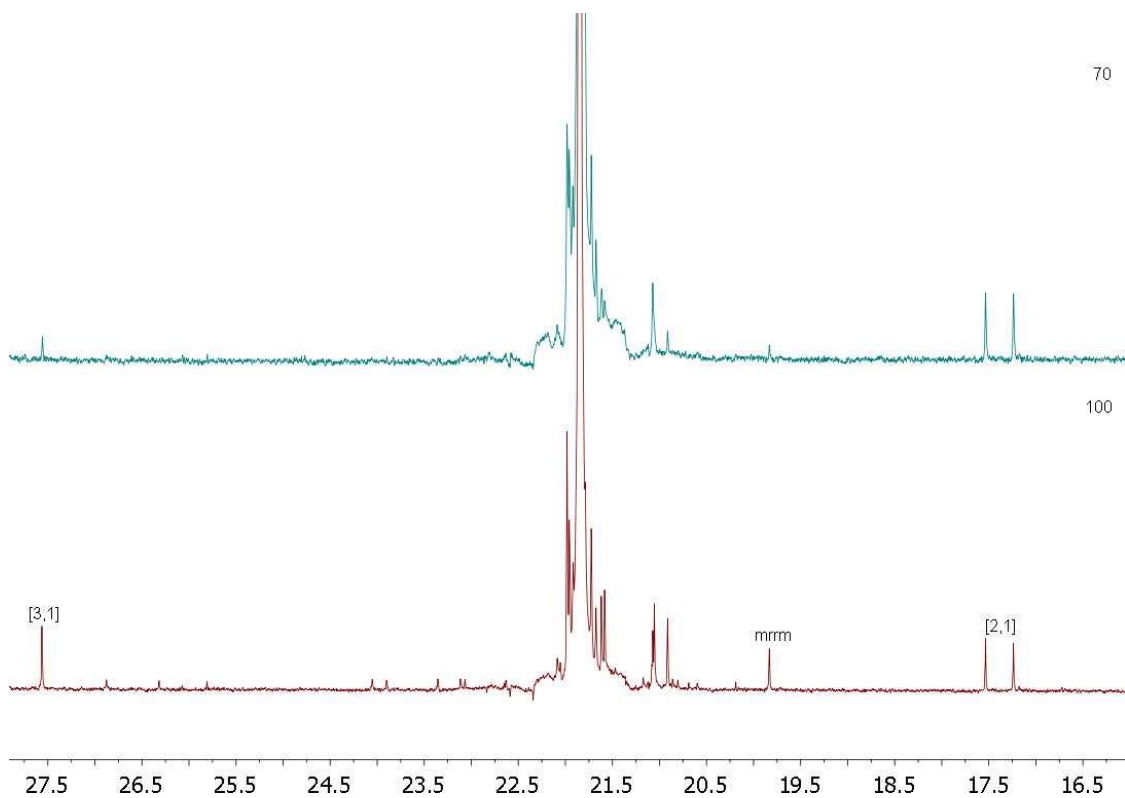

**Figure S55.** <sup>13</sup>C NMR (150 MHz, tetrachloroethane-d<sub>2</sub>, 120°C) spectra of iPP obtained with **M10/AB** (Table 6) at 70°C (top) and 100°C (bottom).
